# Supplementary material for: Year-round monitoring reveals prevalence of fatal bird-window collisions at the Virginia Tech Corporate Research Center
Source: PeerJ. 2018 Apr 4;6:e4562. doi: 10.7717/peerj.4562 (PMC5889704; doi:10.7717/peerj.4562)
Supplement: Supplemental Information 1 — Raw data. [file peerj-06-4562-s001.xlsx]

## Sheet: raw collision data
Observer	Date (mm/dd/yy)	Year	Month	Building #	Start Time (military)	End Time (military)	TOTAL TIME	Species	Building Side	NOTES
JC	2013-10-19	2013	october	15	08:25:00	08:47:00	00:22:00	NONE
JC	2013-10-19	2013	october	16	08:47:00	08:53:00	00:06:00	NONE
JC	2013-10-19	2013	october	9	08:57:00	09:00:00	00:03:00	NONE
JC	2013-10-19	2013	october	20	09:15:00	09:21:00	00:06:00	NONE
JC	2013-10-19	2013	october	21	09:21:00	09:27:00	00:06:00	NONE
JC	2013-10-19	2013	october	26	09:30:00	09:38:00	00:08:00	NONE
JC	2013-10-19	2013	october	17	09:39:00	09:42:00	00:03:00	NONE
KA	2013-10-19	2013	october	3	16:22:00	16:33:00	00:11:00	NONE
KA	2013-10-19	2013	october	8	16:33:00	16:35:00	00:02:00	NONE
KA	2013-10-19	2013	october	14	16:35:00	16:43:00	00:08:00	NONE
KA	2013-10-19	2013	october	12	16:46:00	16:56:00	00:10:00	Mourning dove	E
KA	2013-10-19	2013	october	10	16:57:00	17:04:00	00:07:00	NONE
KA	2013-10-19	2013	october	7	17:04:00	17:14:00	00:10:00	NONE
KA	2013-10-19	2013	october	1	17:16:00	17:23:00	00:07:00	NONE
KA	2013-10-19	2013	october	2	17:24:00	17:30:00	00:06:00	NONE
KA	2013-10-19	2013	october	4	17:30:00	17:35:00	00:05:00	NONE
KA	2013-10-19	2013	october	5	17:36:00	17:44:00	00:08:00	NONE
KA	2013-10-19	2013	october	30	17:50:00	17:59:00	00:09:00	NONE
CB	2013-10-20	2013	october	24	08:31:00	08:40:00	00:09:00	NONE
CB	2013-10-20	2013	october	27	08:42:00	08:47:00	00:05:00	NONE
CB	2013-10-20	2013	october	23	08:50:00	08:56:00	00:06:00	NONE
CB	2013-10-20	2013	october	9	09:05:00	09:11:00	00:06:00	NONE
CB	2013-10-20	2013	october	15	09:20:00	09:41:00	00:21:00	NONE
CB	2013-10-20	2013	october	16	09:30:00	09:41:00	00:11:00	none
CB	2013-10-20	2013	october	20	09:48:00	09:55:00	00:07:00	NONE
CB	2013-10-20	2013	october	21	09:55:00	10:02:00	00:07:00	NONE
CB	2013-10-20	2013	october	26	10:08:00	10:16:00	00:08:00	NONE
CB	2013-10-20	2013	october	17	10:19:00	10:26:00	00:07:00	NONE
JC	2013-10-20	2013	october	12	09:25:00	09:33:00	00:08:00	NONE
JC	2013-10-20	2013	october	7	09:34:00	09:53:00	00:19:00	NONE
JC	2013-10-20	2013	october	10	09:56:00	10:13:00	00:17:00	NONE
JC	2013-10-20	2013	october	2	10:17:00	10:25:00	00:08:00	NONE
JC	2013-10-20	2013	october	4	10:33:00	10:36:00	00:03:00	NONE
JC	2013-10-20	2013	october	5	10:42:00	10:54:00	00:12:00	NONE
JC	2013-10-20	2013	october	3	11:03:00	11:09:00	00:06:00	NONE
JC	2013-10-20	2013	october	8	11:12:00	11:15:00	00:03:00	NONE
JC	2013-10-20	2013	october	14	11:18:00	11:24:00	00:06:00	NONE
BK	2013-10-22	2013	october	27	17:07:00	17:20:00	00:13:00	NONE
BK	2013-10-22	2013	october	24	17:22:00	17:40:00	00:18:00	nONE
BK	2013-10-22	2013	october	23	17:43:00	17:55:00	00:12:00	NONE
BK	2013-10-22	2013	october	17	17:59:00	18:15:00	00:16:00	Eastern Towhee	C
BK	2013-10-22	2013	october	26	18:18:00	18:33:00	00:15:00	none
BK	2013-10-22	2013	october	21	18:36:00	18:45:00	00:09:00	NONE
CB	2013-10-22	2013	october	3	17:59:00	18:05:00	00:06:00	NONE
CB	2013-10-22	2013	october	8	18:05:00	18:08:00	00:03:00	NONE
CB	2013-10-22	2013	october	14	18:08:00	18:13:00	00:05:00	NONE
CB	2013-10-22	2013	october	12	18:16:00	18:23:00	00:07:00	NONE
CB	2013-10-22	2013	october	10	18:26:00	18:30:00	00:04:00	NONE
CB	2013-10-22	2013	october	7	18:30:00	18:35:00	00:05:00	NONE
CB	2013-10-22	2013	october	2	18:40:00	18:42:00	00:02:00	NONE
CB	2013-10-22	2013	october	4	18:42:00	18:46:00	00:04:00	NONE
CB	2013-10-22	2013	october	1	18:47:00	18:49:00	00:02:00	NONE
CB	2013-10-22	2013	october	5	18:51:00	18:57:00	00:06:00	NONE
CB	2013-10-22	2013	october	30	18:58:00	19:04:00	00:06:00	NONE
KA	2013-10-23	2013	october	26	16:50:00	17:00:00	00:10:00	NONE
KA	2013-10-23	2013	october	17	17:02:00	17:07:00	00:05:00	NONE
KA	2013-10-23	2013	october	21	17:10:00	17:16:00	00:06:00	NONE
KA	2013-10-23	2013	october	20	17:16:00	17:22:00	00:06:00	NONE
KA	2013-10-23	2013	october	9	17:24:00	17:29:00	00:05:00	NONE
KA	2013-10-23	2013	october	16	17:30:00	17:34:00	00:04:00	NONE
KA	2013-10-23	2013	october	15	17:34:00	17:41:00	00:07:00	NONE
KA	2013-10-23	2013	october	23	17:43:00	17:50:00	00:07:00	NONE
KA	2013-10-23	2013	october	24	17:53:00	18:05:00	00:12:00	NONE
KA	2013-10-23	2013	october	27	18:05:00	18:09:00	00:04:00	NONE
RMS	2013-10-23	2013	october	11	08:00:00	08:07:00	00:07:00	NONE
RMS	2013-10-23	2013	october	8	08:08:00	08:12:00	00:04:00	NONE
RMS	2013-10-23	2013	october	14	08:13:00	08:18:00	00:05:00	NONE
RMS	2013-10-23	2013	october	3	08:20:00	08:23:00	00:03:00	NONE
RMS	2013-10-23	2013	october	10	08:30:00	08:39:00	00:09:00	Hermit Thrush (juv)	D
RMS	2013-10-23	2013	october	12	08:40:00	08:46:00	00:06:00	none		same MODO, E
RMS	2013-10-23	2013	october	7	08:48:00	08:58:00	00:10:00	NONE
RMS	2013-10-23	2013	october	4	09:03:00	09:06:00	00:03:00	NONE
RMS	2013-10-23	2013	october	5	09:10:00	09:16:00	00:06:00	NONE
RMS	2013-10-23	2013	october	1	09:20:00	09:24:00	00:04:00	NONE
RMS	2013-10-23	2013	october	2	09:25:00	09:31:00	00:06:00	NONE
CB	2013-10-24	2013	october	26	17:36:00	17:42:00	00:06:00	NONE
CB	2013-10-24	2013	october	17	17:45:00	17:52:00	00:07:00	NONE
CB	2013-10-24	2013	october	9	17:55:00	18:00:00	00:05:00	NONE
CB	2013-10-24	2013	october	15	18:00:00	18:07:00	00:07:00	NONE
CB	2013-10-24	2013	october	16	18:07:00	18:14:00	00:07:00	NONE
CB	2013-10-24	2013	october	20	18:18:00	18:24:00	00:06:00	NONE
CB	2013-10-24	2013	october	21	18:24:00	18:29:00	00:05:00	NONE
CB	2013-10-24	2013	october	23	18:38:00	18:42:00	00:04:00	NONE
CB	2013-10-24	2013	october	24	18:43:00	18:49:00	00:06:00	NONE
CB	2013-10-24	2013	october	27	18:51:00	18:54:00	00:03:00	NONE
JC	2013-10-24	2013	october	2	09:11:00	09:16:00	00:05:00	NONE
JC	2013-10-24	2013	october	4	09:16:00	09:19:00	00:03:00	NONE
JC	2013-10-24	2013	october	5	09:22:00	09:28:00	00:06:00	NONE
JC	2013-10-24	2013	october	1	09:31:00	09:34:00	00:03:00	NONE
JC	2013-10-24	2013	october	10	09:40:00	09:45:00	00:05:00	NONE
JC	2013-10-24	2013	october	12	09:46:00	09:49:00	00:03:00	NONE
JC	2013-10-24	2013	october	7	09:50:00	09:56:00	00:06:00	NONE
JC	2013-10-24	2013	october	3	11:05:00	11:09:00	00:04:00	NONE
JC	2013-10-24	2013	october	8	11:12:00	11:17:00	00:05:00	NONE
JC	2013-10-24	2013	october	14	11:18:00	11:22:00	00:04:00	NONE
EF	2013-10-25	2013	october	17	08:07:00	08:20:00	00:13:00	none		couple body feathers, B
EF	2013-10-25	2013	october	26	08:24:00	08:40:00	00:16:00	NONE
EF	2013-10-25	2013	october	20	08:42:00	08:52:00	00:10:00	NONE
EF	2013-10-25	2013	october	21	08:53:00	09:10:00	00:17:00	NONE
EF	2013-10-25	2013	october	9	09:15:00	09:35:00	00:20:00	NONE
EF	2013-10-25	2013	october	15	09:36:00	09:45:00	00:09:00	NONE
EF	2013-10-25	2013	october	16	09:45:00	09:56:00	00:11:00	NONE
JC	2013-10-25	2013	october	21	09:15:00	09:21:00	00:06:00	NONE
JC	2013-10-25	2013	october	20	09:21:00	09:26:00	00:05:00	NONE
JC	2013-10-25	2013	october	17	09:37:00	09:42:00	00:05:00	NONE
JC	2013-10-25	2013	october	26	09:47:00	09:51:00	00:04:00	NONE
JC	2013-10-25	2013	october	9	09:55:00	09:58:00	00:03:00	NONE
JC	2013-10-25	2013	october	15	10:01:00	10:05:00	00:04:00	NONE
JC	2013-10-25	2013	october	16	10:05:00	10:10:00	00:05:00	NONE
JC	2013-10-25	2013	october	24	10:20:00	10:23:00	00:03:00	NONE
JC	2013-10-25	2013	october	23	10:25:00	10:28:00	00:03:00	NONE
JC	2013-10-25	2013	october	27	10:30:00	10:32:00	00:02:00	NONE
JC	2013-10-26	2013	october	8	09:38:00	09:43:00	00:05:00	NONE
JC	2013-10-26	2013	october	14	09:45:00	09:47:00	00:02:00	NONE
JC	2013-10-26	2013	october	3	09:47:00	09:51:00	00:04:00	NONE
JC	2013-10-26	2013	october	12	09:55:00	10:00:00	00:05:00	NONE
JC	2013-10-26	2013	october	10	10:01:00	10:05:00	00:04:00	NONE
JC	2013-10-26	2013	october	7	10:07:00	10:10:00	00:03:00	NONE
JC	2013-10-26	2013	october	1	10:21:00	10:23:00	00:02:00	NONE
JC	2013-10-26	2013	october	2	10:26:00	10:32:00	00:06:00	NONE
JC	2013-10-26	2013	october	4	10:33:00	10:37:00	00:04:00	NONE
JC	2013-10-26	2013	october	5	10:41:00	10:45:00	00:04:00	NONE
KM	2013-10-27	2013	october	7	15:35:00	15:38:00	00:03:00	Golden-crowned kinglet	B
CB	2013-10-27	2013	october	17	08:58:00	09:05:00	00:07:00	NONE
CB	2013-10-27	2013	october	26	09:07:00	09:15:00	00:08:00	NONE
CB	2013-10-27	2013	october	20	09:20:00	09:25:00	00:05:00	NONE
CB	2013-10-27	2013	october	21	09:25:00	09:31:00	00:06:00	NONE
CB	2013-10-27	2013	october	9	09:35:00	09:39:00	00:04:00	NONE
CB	2013-10-27	2013	october	15	09:40:00	09:45:00	00:05:00	NONE
CB	2013-10-27	2013	october	16	09:45:00	09:50:00	00:05:00	NONE
CB	2013-10-27	2013	october	24	09:55:00	10:00:00	00:05:00	NONE
CB	2013-10-27	2013	october	23	10:01:00	10:06:00	00:05:00	NONE		feather side D, black
CB	2013-10-27	2013	october	27	10:10:00	10:14:00	00:04:00	NONE
MSG	2013-10-28	2013	october	9	15:20:00	15:39:00	00:19:00	Gray Catbird	D
MSG	2013-10-28	2013	october	15	15:41:00	16:08:00	00:27:00	White-breasted Nuthatch	B
MSG	2013-10-28	2013	october	x	x	x	x	Carolina Chickadee	B
MSG	2013-10-28	2013	october	16	16:08:00	16:20:00	00:12:00	none
MSG	2013-10-28	2013	october	20	16:27:00	16:50:00	00:23:00	unknown	A
MSG	2013-10-28	2013	october	21	16:50:00	16:58:00	00:08:00	NONE
MSG	2013-10-28	2013	october	26	17:00:00	17:09:00	00:09:00	NONE
RMS	2013-10-28	2013	october	11	15:07:00	15:21:00	00:14:00	unknown	B
RMS	2013-10-28	2013	october	27	15:24:00	15:35:00	00:11:00	NONE
RMS	2013-10-28	2013	october	24	15:37:00	15:54:00	00:17:00	NONE
RMS	2013-10-28	2013	october	23	15:57:00	16:06:00	00:09:00	NONE
RMS	2013-10-28	2013	october	17	16:12:00	16:24:00	00:12:00	NONE
CB	2013-10-29	2013	october	26	17:38:00	17:46:00	00:08:00	none
CB	2013-10-29	2013	october	17	17:49:00	17:55:00	00:06:00	NONE
CB	2013-10-29	2013	october	21	17:55:00	17:59:00	00:04:00	NONE
CB	2013-10-29	2013	october	20	17:59:00	18:04:00	00:05:00	NONE
CB	2013-10-29	2013	october	15	18:08:00	18:14:00	00:06:00	NONE
CB	2013-10-29	2013	october	16	18:14:00	18:21:00	00:07:00	NONE
CB	2013-10-29	2013	october	9	18:22:00	18:26:00	00:04:00	NONE
CB	2013-10-29	2013	october	23	18:30:00	18:34:00	00:04:00	NONE
CB	2013-10-29	2013	october	24	18:34:00	18:42:00	00:08:00	none
CB	2013-10-29	2013	october	27	18:44:00	18:48:00	00:04:00	NONE
CK	2013-10-29	2013	october	15	14:58:00	15:47:00	00:49:00	none
CK	2013-10-29	2013	october	4	16:00:00	16:09:00	00:09:00	NONE
CK	2013-10-29	2013	october	2	16:10:00	16:33:00	00:23:00	none
CK	2013-10-29	2013	october	5	16:39:00	16:49:00	00:10:00	NONE
CK	2013-10-29	2013	october	1	16:54:00	17:00:00	00:06:00	NONE
CK	2013-10-29	2013	october	10	17:17:00	17:28:00	00:11:00	none
CK	2013-10-29	2013	october	7	17:30:00	17:35:00	00:05:00	NONE
RMS	2013-10-29	2013	october	11	15:53:00	16:05:00	00:12:00	NONE
KA	2013-10-30	2013	october	30	16:36:00	16:42:00	00:06:00	NONE
KA	2013-10-30	2013	october	3	16:46:00	16:50:00	00:04:00	NONE
KA	2013-10-30	2013	october	14	16:50:00	16:52:00	00:02:00	NONE
KA	2013-10-30	2013	october	8	16:52:00	16:56:00	00:04:00	NONE
KA	2013-10-30	2013	october	12	16:57:00	17:02:00	00:05:00	NONE
KA	2013-10-30	2013	october	10	17:02:00	17:07:00	00:05:00	NONE
KA	2013-10-30	2013	october	7	17:08:00	17:13:00	00:05:00	NONE
KA	2013-10-30	2013	october	1	17:13:00	17:17:00	00:04:00	NONE
KA	2013-10-30	2013	october	2	17:17:00	17:25:00	00:08:00	NONE
KA	2013-10-30	2013	october	4	17:25:00	17:31:00	00:06:00	NONE
KA	2013-10-30	2013	october	5	17:34:00	17:40:00	00:06:00	NONE
CB	2013-10-31	2013	october	1	17:15:00	17:17:00	00:02:00	NONE
CB	2013-10-31	2013	october	2	17:18:00	17:21:00	00:03:00	NONE
CB	2013-10-31	2013	october	4	17:21:00	17:24:00	00:03:00	NONE
CB	2013-10-31	2013	october	5	17:26:00	17:31:00	00:05:00	NONE
CB	2013-10-31	2013	october	12	17:33:00	17:39:00	00:06:00	none
CB	2013-10-31	2013	october	7	17:39:00	17:45:00	00:06:00	Mourning dove	B	Tons of feathers, no carcass
CB	2013-10-31	2013	october	10	17:45:00	17:49:00	00:04:00	NONE
CB	2013-10-31	2013	october	8	17:51:00	17:53:00	00:02:00	NONE
CB	2013-10-31	2013	october	14	17:53:00	17:56:00	00:03:00	NONE
CB	2013-10-31	2013	october	3	17:56:00	18:00:00	00:04:00	NONE
CB	2013-10-31	2013	october	30	18:03:00	18:06:00	00:03:00	NONE
CK	2013-10-31	2013	october	15	14:58:00	15:22:00	00:24:00	none
CK	2013-10-31	2013	october	9	15:27:00	15:50:00	00:23:00	none
CK	2013-10-31	2013	october	24	15:58:00	16:09:00	00:11:00	NONE
CK	2013-10-31	2013	october	23	16:13:00	16:19:00	00:06:00	NONE
CK	2013-10-31	2013	october	27	16:23:00	16:32:00	00:09:00	NONE
CK	2013-10-31	2013	october	17	16:42:00	16:47:00	00:05:00	NONE
CK	2013-10-31	2013	october	20	16:51:00	16:57:00	00:06:00	NONE
CK	2013-10-31	2013	october	21	16:57:00	17:08:00	00:11:00	NONE
CK	2013-10-31	2013	october	26	17:12:00	17:19:00	00:07:00	NONE
BK	2013-11-01	2013	november	8	14:57:00	15:02:00	00:05:00	NONE
BK	2013-11-01	2013	november	14	15:03:00	15:04:00	00:01:00	NONE
BK	2013-11-01	2013	november	3	15:10:00	15:16:00	00:06:00	NONE
BK	2013-11-01	2013	november	12	15:18:00	15:24:00	00:06:00	none
BK	2013-11-01	2013	november	7	15:26:00	15:46:00	00:20:00	none		same MODO
BK	2013-11-01	2013	november	10	15:48:00	15:53:00	00:05:00	NONE
BK	2013-11-01	2013	november	1	15:56:00	15:59:00	00:03:00	NONE
BK	2013-11-01	2013	november	2	16:01:00	16:08:00	00:07:00	NONE
BK	2013-11-01	2013	november	4	16:09:00	16:19:00	00:10:00	White-throated Sparrow HY	C
BK	2013-11-01	2013	november	5	16:25:00	16:31:00	00:06:00	NONE
RMS	2013-11-01	2013	november	11	16:02:00	16:14:00	00:12:00	NONE
EF	2013-11-02	2013	november	17	16:25:00	16:35:00	00:10:00	NONE
EF	2013-11-02	2013	november	26	16:38:00	16:49:00	00:11:00	NONE
EF	2013-11-02	2013	november	20	16:52:00	16:59:00	00:07:00	NONE
EF	2013-11-02	2013	november	21	17:00:00	17:11:00	00:11:00	NONE
EF	2013-11-02	2013	november	9	17:12:00	17:24:00	00:12:00	NONE
EF	2013-11-02	2013	november	15	17:26:00	17:42:00	00:16:00	NONE
EF	2013-11-02	2013	november	16	17:43:00	17:58:00	00:15:00	NONE
JC	2013-11-02	2013	november	27	10:24:00	10:28:00	00:04:00	NONE
JC	2013-11-02	2013	november	24	10:32:00	10:37:00	00:05:00	NONE
JC	2013-11-02	2013	november	23	10:39:00	10:42:00	00:03:00	NONE
JC	2013-11-02	2013	november	9	10:45:00	10:49:00	00:04:00	NONE
JC	2013-11-02	2013	november	15	10:52:00	10:57:00	00:05:00	NONE
JC	2013-11-02	2013	november	16	10:57:00	11:02:00	00:05:00	NONE
JC	2013-11-02	2013	november	20	11:05:00	11:10:00	00:05:00	NONE
JC	2013-11-02	2013	november	21	11:11:00	11:15:00	00:04:00	NONE
JC	2013-11-02	2013	november	17	11:20:00	11:23:00	00:03:00	NONE
JC	2013-11-02	2013	november	26	11:26:00	11:31:00	00:05:00	NONE
CB	2013-11-03	2013	november	5	08:37:00	08:42:00	00:05:00	NONE
CB	2013-11-03	2013	november	2	08:45:00	08:50:00	00:05:00	NONE
CB	2013-11-03	2013	november	4	08:50:00	08:55:00	00:05:00	none
CB	2013-11-03	2013	november	1	08:56:00	08:59:00	00:03:00	NONE
CB	2013-11-03	2013	november	10	09:02:00	09:07:00	00:05:00	NONE
CB	2013-11-03	2013	november	7	09:08:00	09:14:00	00:06:00	NONE
CB	2013-11-03	2013	november	12	09:15:00	09:19:00	00:04:00	NONE
CB	2013-11-03	2013	november	8	09:21:00	09:24:00	00:03:00	NONE
CB	2013-11-03	2013	november	14	09:24:00	09:27:00	00:03:00	NONE
CB	2013-11-03	2013	november	3	09:27:00	09:32:00	00:05:00	NONE
CB	2013-11-03	2013	november	30	09:35:00	09:38:00	00:03:00	NONE
BK	2013-11-04	2013	november	10	15:19:00	15:29:00	00:10:00	none
BK	2013-11-04	2013	november	7	15:30:00	15:40:00	00:10:00	none		Old MODO
BK	2013-11-04	2013	november	12	15:41:00	15:47:00	00:06:00	none		Old MODO, D
BK	2013-11-04	2013	november	3	15:49:00	15:57:00	00:08:00	NONE		1 juv tail feather, C
BK	2013-11-04	2013	november	8	15:58:00	16:01:00	00:03:00	NONE
BK	2013-11-04	2013	november	14	16:02:00	16:07:00	00:05:00	NONE		crow feather, D
RMS	2013-11-04	2013	november	5	15:25:00	15:34:00	00:09:00	NONE
RMS	2013-11-04	2013	november	4	15:35:00	15:47:00	00:12:00	NONE
RMS	2013-11-04	2013	november	2	15:56:00	16:03:00	00:07:00	NONE
RMS	2013-11-04	2013	november	1	16:04:00	16:13:00	00:09:00	NONE
RMS	2013-11-04	2013	november	11	16:15:00	16:39:00	00:24:00	Fox Sparrow	D
RMS	2013-11-04	2013	november	x	x	x	x	unknown	C
CB	2013-11-05	2013	november	17	16:29:00	16:33:00	00:04:00	NONE
CB	2013-11-05	2013	november	26	16:36:00	16:41:00	00:05:00	NONE
CB	2013-11-05	2013	november	21	16:43:00	16:48:00	00:05:00	NONE
CB	2013-11-05	2013	november	20	16:48:00	16:53:00	00:05:00	none
CB	2013-11-05	2013	november	9	16:56:00	16:59:00	00:03:00	NONE
CB	2013-11-05	2013	november	16	17:00:00	17:08:00	00:08:00	hermit thrush	A
CB	2013-11-05	2013	november	x	x	x	x	song sparrow	D
CB	2013-11-05	2013	november	15	17:08:00	17:16:00	00:08:00	NONE
CB	2013-11-05	2013	november	23	17:20:00	17:24:00	00:04:00	NONE
CB	2013-11-05	2013	november	24	17:25:00	17:29:00	00:04:00	NONE
CB	2013-11-05	2013	november	27	17:31:00	17:34:00	00:03:00	NONE
CK	2013-11-05	2013	november	2	15:13:00	15:22:00	00:09:00	none
CK	2013-11-05	2013	november	4	15:23:00	15:31:00	00:08:00	none
CK	2013-11-05	2013	november	5	15:36:00	15:44:00	00:08:00	NONE
CK	2013-11-05	2013	november	1	15:48:00	15:59:00	00:11:00	none
CK	2013-11-05	2013	november	10	16:03:00	16:16:00	00:13:00	none
CK	2013-11-05	2013	november	7	16:18:00	16:25:00	00:07:00	NONE
CK	2013-11-05	2013	november	12	16:30:00	16:35:00	00:05:00	NONE
CK	2013-11-05	2013	november	3	16:39:00	16:45:00	00:06:00	NONE
CK	2013-11-05	2013	november	8	16:46:00	16:51:00	00:05:00	NONE
CK	2013-11-05	2013	november	14	16:57:00	17:05:00	00:08:00	NONE
KA	2013-11-06	2013	november	26	15:37:00	15:46:00	00:09:00	NONE
KA	2013-11-06	2013	november	17	14:47:00	15:52:00	01:05:00	NONE
KA	2013-11-06	2013	november	21	15:54:00	15:59:00	00:05:00	NONE
KA	2013-11-06	2013	november	20	16:00:00	16:06:00	00:06:00	NONE
KA	2013-11-06	2013	november	9	16:08:00	16:11:00	00:03:00	NONE
KA	2013-11-06	2013	november	16	16:12:00	16:18:00	00:06:00	NONE
KA	2013-11-06	2013	november	15	16:18:00	16:23:00	00:05:00	NONE
KA	2013-11-06	2013	november	23	16:25:00	16:30:00	00:05:00	NONE
KA	2013-11-06	2013	november	24	16:32:00	16:39:00	00:07:00	NONE
KA	2013-11-06	2013	november	27	16:40:00	16:44:00	00:04:00	NONE
RMS	2013-11-06	2013	november	11	16:03:00	16:09:00	00:06:00	NONE
CB	2013-11-07	2013	november	30	16:24:00	16:28:00	00:04:00	NONE
CB	2013-11-07	2013	november	8	16:31:00	16:33:00	00:02:00	NONE
CB	2013-11-07	2013	november	14	16:33:00	16:37:00	00:04:00	NONE
CB	2013-11-07	2013	november	3	16:37:00	16:43:00	00:06:00	Golden-crowned kinglet	C
CB	2013-11-07	2013	november	10	16:46:00	16:50:00	00:04:00	NONE
CB	2013-11-07	2013	november	12	16:50:00	16:56:00	00:06:00	dark-eyed junco	C
CB	2013-11-07	2013	november	7	16:58:00	17:01:00	00:03:00	NONE
CB	2013-11-07	2013	november	2	17:05:00	17:11:00	00:06:00	NONE
CB	2013-11-07	2013	november	4	17:11:00	17:14:00	00:03:00	NONE
CB	2013-11-07	2013	november	1	17:15:00	17:17:00	00:02:00	NONE
CB	2013-11-07	2013	november	5	17:20:00	17:24:00	00:04:00	NONE
CK	2013-11-07	2013	november	15	09:13:00	09:28:00	00:15:00	none
CK	2013-11-07	2013	november	9	09:31:00	09:36:00	00:05:00	NONE
CK	2013-11-07	2013	november	23	09:42:00	09:47:00	00:05:00	NONE
CK	2013-11-07	2013	november	24	09:51:00	09:59:00	00:08:00	NONE
CK	2013-11-07	2013	november	27	10:03:00	10:07:00	00:04:00	NONE
CK	2013-11-07	2013	november	17	10:17:00	10:23:00	00:06:00	NONE
CK	2013-11-07	2013	november	26	10:28:00	10:36:00	00:08:00	NONE
CK	2013-11-07	2013	november	20	10:40:00	10:48:00	00:08:00	none
CK	2013-11-07	2013	november	21	10:48:00	10:54:00	00:06:00	NONE
JC	2013-11-08	2013	november	8	09:35:00	09:37:00	00:02:00	NONE
JC	2013-11-08	2013	november	14	09:38:00	09:44:00	00:06:00	NONE
JC	2013-11-08	2013	november	3	09:45:00	09:47:00	00:02:00	NONE
JC	2013-11-08	2013	november	12	09:51:00	09:54:00	00:03:00	NONE
JC	2013-11-08	2013	november	10	09:56:00	09:59:00	00:03:00	NONE
JC	2013-11-08	2013	november	7	10:00:00	10:04:00	00:04:00	NONE
JC	2013-11-08	2013	november	1	10:07:00	10:12:00	00:05:00	NONE
JC	2013-11-08	2013	november	2	10:14:00	10:17:00	00:03:00	NONE
JC	2013-11-08	2013	november	4	10:17:00	10:20:00	00:03:00	NONE
JC	2013-11-08	2013	november	5	10:22:00	10:25:00	00:03:00	NONE
LV	2013-11-08	2013	november	27	13:36:00	13:45:00	00:09:00	NONE
LV	2013-11-08	2013	november	24	13:46:00	14:30:00	00:44:00	none
LV	2013-11-08	2013	november	23	14:35:00	14:55:00	00:20:00	NONE
LV	2013-11-08	2013	november	17	15:00:00	15:26:00	00:26:00	none
RMS	2013-11-08	2013	november	11	15:55:00	16:08:00	00:13:00	White-throated Sparrow	C
JC	2013-11-09	2013	november	27	09:36:00	09:39:00	00:03:00	NONE
JC	2013-11-09	2013	november	24	09:41:00	09:45:00	00:04:00	NONE
JC	2013-11-09	2013	november	23	09:48:00	09:52:00	00:04:00	NONE
JC	2013-11-09	2013	november	9	09:55:00	09:58:00	00:03:00	NONE
JC	2013-11-09	2013	november	16	10:00:00	10:02:00	00:02:00	NONE
JC	2013-11-09	2013	november	15	10:02:00	10:06:00	00:04:00	NONE
JC	2013-11-09	2013	november	21	10:10:00	10:13:00	00:03:00	NONE
JC	2013-11-09	2013	november	20	10:14:00	10:17:00	00:03:00	NONE
JC	2013-11-09	2013	november	17	10:20:00	10:24:00	00:04:00	NONE
JC	2013-11-09	2013	november	26	10:26:00	10:30:00	00:04:00	NONE
CB	2013-11-10	2013	november	17	08:09:00	08:14:00	00:05:00	NONE
CB	2013-11-10	2013	november	26	08:17:00	08:22:00	00:05:00	NONE
CB	2013-11-10	2013	november	20	08:24:00	08:28:00	00:04:00	NONE
CB	2013-11-10	2013	november	21	08:28:00	08:32:00	00:04:00	NONE
CB	2013-11-10	2013	november	9	08:35:00	08:38:00	00:03:00	NONE
CB	2013-11-10	2013	november	15	08:39:00	08:44:00	00:05:00	none
CB	2013-11-10	2013	november	16	08:44:00	08:54:00	00:10:00	NONE
CB	2013-11-10	2013	november	23	08:58:00	09:00:00	00:02:00	NONE
CB	2013-11-10	2013	november	24	09:02:00	09:05:00	00:03:00	NONE
CB	2013-11-10	2013	november	27	09:07:00	09:09:00	00:02:00	NONE
MSG	2013-11-11	2013	november	15	12:12:00	12:26:00	00:14:00	NONE
MSG	2013-11-11	2013	november	16	12:26:00	12:36:00	00:10:00	NONE
MSG	2013-11-11	2013	november	20	12:39:00	12:48:00	00:09:00	NONE
MSG	2013-11-11	2013	november	21	12:48:00	12:57:00	00:09:00	NONE
MSG	2013-11-11	2013	november	9	15:45:00	15:51:00	00:06:00	NONE
MSG	2013-11-11	2013	november	2	15:53:00	15:57:00	00:04:00	NONE
MSG	2013-11-11	2013	november	4	15:57:00	16:02:00	00:05:00	NONE
MSG	2013-11-11	2013	november	10	16:38:00	16:45:00	00:07:00	NONE
MSG	2013-11-11	2013	november	12	16:46:00	17:00:00	00:14:00	NONE
MSG	2013-11-11	2013	november	1	17:10:00	17:16:00	00:06:00	NONE
RMS	2013-11-11	2013	november	23	12:19:00	12:28:00	00:09:00	NONE
RMS	2013-11-11	2013	november	24	12:29:00	12:49:00	00:20:00	unknown	C	feather pile
RMS	2013-11-11	2013	november	11	13:24:00	13:36:00	00:12:00	NONE
RMS	2013-11-11	2013	november	27	13:37:00	13:43:00	00:06:00	NONE
RMS	2013-11-11	2013	november	7	16:18:00	16:31:00	00:13:00	NONE
RMS	2013-11-11	2013	november	3	16:34:00	16:44:00	00:10:00	NONE
RMS	2013-11-11	2013	november	14	16:46:00	16:54:00	00:08:00	NONE
CB	2013-11-12	2013	november	17	16:33:00	16:36:00	00:03:00	NONE
CB	2013-11-12	2013	november	26	16:38:00	16:42:00	00:04:00	NONE
CB	2013-11-12	2013	november	20	16:45:00	16:49:00	00:04:00	NONE
CB	2013-11-12	2013	november	21	16:49:00	16:52:00	00:03:00	NONE
CB	2013-11-12	2013	november	9	16:56:00	16:58:00	00:02:00	NONE
CB	2013-11-12	2013	november	15	17:06:00	17:08:00	00:02:00	NONE
CB	2013-11-12	2013	november	16	17:06:00	17:08:00	00:02:00	NONE
CB	2013-11-12	2013	november	23	17:13:00	17:16:00	00:03:00	NONE
CB	2013-11-12	2013	november	24	17:20:00	17:26:00	00:06:00	none
CB	2013-11-12	2013	november	27	17:27:00	17:28:00	00:01:00	NONE
CK	2013-11-12	2013	november	2	14:58:00	15:03:00	00:05:00	NONE
CK	2013-11-12	2013	november	4	15:03:00	15:08:00	00:05:00	NONE
CK	2013-11-12	2013	november	5	15:11:00	15:20:00	00:09:00	NONE
CK	2013-11-12	2013	november	1	15:24:00	15:29:00	00:05:00	NONE
CK	2013-11-12	2013	november	10	15:32:00	15:38:00	00:06:00	none
CK	2013-11-12	2013	november	7	15:39:00	15:48:00	00:09:00	none
CK	2013-11-12	2013	november	12	15:49:00	15:55:00	00:06:00	none
CK	2013-11-12	2013	november	3	15:57:00	16:05:00	00:08:00	none
CK	2013-11-12	2013	november	8	16:07:00	16:09:00	00:02:00	NONE
CK	2013-11-12	2013	november	14	16:09:00	16:17:00	00:08:00	none
RMS	2013-11-12	2013	november	11	13:24:00	13:34:00	00:10:00	NONE
RMS	2013-11-13	2013	november	11	13:24:00	13:39:00	00:15:00	Indigo Bunting	B
CB	2013-11-14	2013	november	30	15:57:00	16:00:00	00:03:00	NONE
CB	2013-11-14	2013	november	8	16:03:00	16:07:00	00:04:00	none		Tiny fluffy grey feather, D
CB	2013-11-14	2013	november	14	16:07:00	16:10:00	00:03:00	NONE
CB	2013-11-14	2013	november	3	16:10:00	16:21:00	00:11:00	northern cardinal	B	partially decayed carcass
CB	2013-11-14	2013	november	12	16:24:00	16:28:00	00:04:00	NONE
CB	2013-11-14	2013	november	10	16:28:00	16:31:00	00:03:00	NONE
CB	2013-11-14	2013	november	7	16:32:00	16:37:00	00:05:00	none
CB	2013-11-14	2013	november	5	16:39:00	16:42:00	00:03:00	NONE
CB	2013-11-14	2013	november	2	16:46:00	16:48:00	00:02:00	NONE
CB	2013-11-14	2013	november	4	16:48:00	16:51:00	00:03:00	NONE
CB	2013-11-14	2013	november	1	16:52:00	16:55:00	00:03:00	Golden-crowned kinglet	B
CK	2013-11-14	2013	november	15	14:58:00	15:09:00	00:11:00	none
CK	2013-11-14	2013	november	9	15:18:00	15:21:00	00:03:00	NONE
CK	2013-11-14	2013	november	21	15:28:00	15:32:00	00:04:00	NONE
CK	2013-11-14	2013	november	20	15:32:00	15:38:00	00:06:00	NONE
CK	2013-11-14	2013	november	26	15:46:00	15:53:00	00:07:00	NONE
CK	2013-11-14	2013	november	17	15:56:00	16:01:00	00:05:00	NONE
CK	2013-11-14	2013	november	23	16:09:00	16:13:00	00:04:00	NONE
CK	2013-11-14	2013	november	24	16:13:00	16:19:00	00:06:00	NONE
CK	2013-11-14	2013	november	27	16:22:00	16:28:00	00:06:00	none
RMS	2013-11-14	2013	november	11	13:28:00	13:38:00	00:10:00	NONE
LV	2013-11-15	2013	november	3	13:05:00	13:25:00	00:20:00	none		old cardinal, B
LV	2013-11-15	2013	november	8	13:34:00	13:42:00	00:08:00	white-throated sparrow	C
LV	2013-11-15	2013	november	14	13:43:00	13:58:00	00:15:00	NONE
LV	2013-11-15	2013	november	12	14:00:00	14:30:00	00:30:00	none
LV	2013-11-15	2013	november	7	14:32:00	14:50:00	00:18:00	none
LV	2013-11-15	2013	november	10	14:54:00	15:10:00	00:16:00	none
LV	2013-11-15	2013	november	1	15:15:00	15:24:00	00:09:00	none
LV	2013-11-15	2013	november	2	15:26:00	15:35:00	00:09:00	NONE
LV	2013-11-15	2013	november	4	15:36:00	15:44:00	00:08:00	NONE
LV	2013-11-15	2013	november	5	15:45:00	16:00:00	00:15:00	NONE
RMS	2013-11-15	2013	november	11	13:24:00	13:35:00	00:11:00	NONE
EF	2013-11-16	2013	november	17	15:30:00	15:45:00	00:15:00	NONE
EF	2013-11-16	2013	november	26	15:48:00	16:17:00	00:29:00	NONE
EF	2013-11-16	2013	november	20	16:18:00	16:28:00	00:10:00	NONE
EF	2013-11-16	2013	november	21	16:29:00	16:43:00	00:14:00	NONE
EF	2013-11-16	2013	november	9	16:46:00	16:55:00	00:09:00	NONE
EF	2013-11-16	2013	november	15	16:57:00	17:15:00	00:18:00	NONE
EF	2013-11-16	2013	november	16	17:16:00	17:30:00	00:14:00	NONE
JC	2013-11-16	2013	november	8	09:19:00	09:23:00	00:04:00	NONE
JC	2013-11-16	2013	november	14	09:24:00	09:26:00	00:02:00	NONE
JC	2013-11-16	2013	november	3	09:27:00	09:30:00	00:03:00	NONE
JC	2013-11-16	2013	november	12	09:33:00	09:36:00	00:03:00	NONE
JC	2013-11-16	2013	november	7	09:37:00	09:40:00	00:03:00	NONE
JC	2013-11-16	2013	november	10	09:42:00	09:46:00	00:04:00	NONE
JC	2013-11-16	2013	november	1	09:50:00	09:52:00	00:02:00	NONE
JC	2013-11-16	2013	november	2	09:55:00	09:57:00	00:02:00	NONE
JC	2013-11-16	2013	november	4	09:58:00	10:01:00	00:03:00	NONE
JC	2013-11-16	2013	november	5	10:04:00	10:07:00	00:03:00	NONE
CB	2013-11-17	2013	november	2	08:54:00	09:01:00	00:07:00	NONE
CB	2013-11-17	2013	november	4	09:02:00	09:05:00	00:03:00	NONE
CB	2013-11-17	2013	november	1	09:06:00	09:08:00	00:02:00	NONE
CB	2013-11-17	2013	november	5	09:11:00	09:15:00	00:04:00	NONE
CB	2013-11-17	2013	november	12	09:17:00	09:22:00	00:05:00	NONE
CB	2013-11-17	2013	november	10	09:22:00	09:26:00	00:04:00	NONE
CB	2013-11-17	2013	november	7	09:26:00	09:29:00	00:03:00	NONE
CB	2013-11-17	2013	november	8	09:33:00	09:35:00	00:02:00	NONE
CB	2013-11-17	2013	november	14	09:35:00	09:39:00	00:04:00	NONE
CB	2013-11-17	2013	november	3	09:39:00	09:44:00	00:05:00	NONE
CB	2013-11-17	2013	november	30	09:46:00	09:50:00	00:04:00	NONE
BK	2013-11-18	2013	november	2	13:16:00	13:19:00	00:03:00	NONE
BK	2013-11-18	2013	november	4	13:20:00	13:25:00	00:05:00	NONE
BK	2013-11-18	2013	november	5	13:27:00	13:35:00	00:08:00	NONE
BK	2013-11-18	2013	november	1	13:38:00	13:42:00	00:04:00	NONE
KK	2013-11-18	2013	november	17	15:03:00	15:23:00	00:20:00	none
KK	2013-11-18	2013	november	26	15:25:00	15:45:00	00:20:00	NONE
KK	2013-11-18	2013	november	20	15:49:00	16:02:00	00:13:00	none
KK	2013-11-18	2013	november	21	16:02:00	16:13:00	00:11:00	NONE
KK	2013-11-18	2013	november	9	16:20:00	16:27:00	00:07:00	NONE
KK	2013-11-18	2013	november	16	16:28:00	16:53:00	00:25:00	none
KK	2013-11-18	2013	november	15	16:53:00	17:04:00	00:11:00	NONE
KK	2013-11-18	2013	november	27	17:10:00	17:15:00	00:05:00	NONE
KK	2013-11-18	2013	november	24	17:16:00	17:26:00	00:10:00	NONE
KK	2013-11-18	2013	november	23	17:29:00	17:35:00	00:06:00	NONE
MSG	2013-11-18	2013	november	10	13:06:00	13:16:00	00:10:00	NONE
MSG	2013-11-18	2013	november	7	13:18:00	13:29:00	00:11:00	NONE
MSG	2013-11-18	2013	november	12	13:30:00	13:38:00	00:08:00	NONE
MSG	2013-11-18	2013	november	3	13:39:00	13:47:00	00:08:00	NONE
MSG	2013-11-18	2013	november	14	13:49:00	13:55:00	00:06:00	NONE
MSG	2013-11-18	2013	november	8	13:55:00	14:00:00	00:05:00	NONE
RMS	2013-11-18	2013	november	11	13:34:00	13:44:00	00:10:00	NONE
CB	2013-11-19	2013	november	17	16:20:00	16:23:00	00:03:00	NONE
CB	2013-11-19	2013	november	26	16:25:00	16:30:00	00:05:00	NONE
CB	2013-11-19	2013	november	20	16:32:00	16:36:00	00:04:00	NONE
CB	2013-11-19	2013	november	21	16:36:00	16:40:00	00:04:00	NONE
CB	2013-11-19	2013	november	9	16:42:00	16:45:00	00:03:00	NONE
CB	2013-11-19	2013	november	15	16:46:00	16:52:00	00:06:00	none
CB	2013-11-19	2013	november	16	16:52:00	16:58:00	00:06:00	none
CB	2013-11-19	2013	november	24	17:03:00	17:08:00	00:05:00	NONE
CB	2013-11-19	2013	november	23	17:09:00	17:12:00	00:03:00	NONE
CB	2013-11-19	2013	november	27	17:15:00	17:16:00	00:01:00	NONE
KK	2013-11-20	2013	november	3	14:21:00	14:39:00	00:18:00	none		old cardinal, B
KK	2013-11-20	2013	november	8	14:40:00	14:52:00	00:12:00	none		old white-throated sparrow, C
KK	2013-11-20	2013	november	5	15:25:00	15:34:00	00:09:00	NONE
KK	2013-11-20	2013	november	14	15:38:00	15:46:00	00:08:00	NONE
KK	2013-11-20	2013	november	12	15:49:00	16:14:00	00:25:00	none
KK	2013-11-20	2013	november	7	16:15:00	16:26:00	00:11:00	none
KK	2013-11-20	2013	november	10	16:27:00	16:33:00	00:06:00	NONE
KK	2013-11-20	2013	november	1	16:34:00	16:41:00	00:07:00	NONE
KK	2013-11-20	2013	november	2	16:42:00	16:47:00	00:05:00	NONE
KK	2013-11-20	2013	november	4	16:47:00	16:52:00	00:05:00	NONE
RMS	2013-11-20	2013	november	11	07:25:00	07:34:00	00:09:00	NONE
CB	2013-11-21	2013	november	2	16:08:00	16:11:00	00:03:00	NONE
CB	2013-11-21	2013	november	4	16:11:00	16:15:00	00:04:00	NONE
CB	2013-11-21	2013	november	1	16:16:00	16:19:00	00:03:00	NONE
CB	2013-11-21	2013	november	5	16:21:00	16:27:00	00:06:00	NONE
CB	2013-11-21	2013	november	12	16:30:00	16:33:00	00:03:00	NONE
CB	2013-11-21	2013	november	10	16:34:00	16:38:00	00:04:00	NONE
CB	2013-11-21	2013	november	7	16:39:00	16:43:00	00:04:00	NONE
CB	2013-11-21	2013	november	3	16:52:00	16:57:00	00:05:00	NONE
CB	2013-11-21	2013	november	14	16:57:00	17:00:00	00:03:00	NONE
CB	2013-11-21	2013	november	8	17:00:00	17:02:00	00:02:00	NONE
CB	2013-11-21	2013	november	30	17:06:00	17:10:00	00:04:00	NONE
CK	2013-11-21	2013	november	15	14:03:00	14:22:00	00:19:00	none
CK	2013-11-21	2013	november	9	14:22:00	14:26:00	00:04:00	NONE
CK	2013-11-21	2013	november	20	14:31:00	14:40:00	00:09:00	NONE
CK	2013-11-21	2013	november	21	14:41:00	14:56:00	00:15:00	none
CK	2013-11-21	2013	november	26	15:03:00	15:12:00	00:09:00	NONE
CK	2013-11-21	2013	november	17	15:18:00	15:24:00	00:06:00	NONE
CK	2013-11-21	2013	november	23	15:30:00	15:35:00	00:05:00	NONE
CK	2013-11-21	2013	november	24	15:36:00	15:43:00	00:07:00	NONE
CK	2013-11-21	2013	november	27	15:46:00	15:52:00	00:06:00	none
CB	2013-11-24	2013	november	17	08:04:00	08:07:00	00:03:00	NONE
CB	2013-11-24	2013	november	26	08:10:00	08:20:00	00:10:00	NONE
CB	2013-11-24	2013	november	20	08:22:00	08:27:00	00:05:00	NONE
CB	2013-11-24	2013	november	21	08:27:00	08:31:00	00:04:00	NONE
CB	2013-11-24	2013	november	9	08:34:00	08:38:00	00:04:00	NONE
CB	2013-11-24	2013	november	15	08:39:00	08:45:00	00:06:00	NONE
CB	2013-11-24	2013	november	16	08:45:00	08:51:00	00:06:00	none
CB	2013-11-24	2013	november	23	08:54:00	08:58:00	00:04:00	NONE
CB	2013-11-24	2013	november	24	09:00:00	09:05:00	00:05:00	NONE
CB	2013-11-24	2013	november	27	09:05:00	09:08:00	00:03:00	NONE
RMS	2013-11-25	2013	november	11	16:05:00	16:17:00	00:12:00	unknown	A	large feather pile
KK	2013-12-02	2013	december	2	15:00:00	15:06:00	00:06:00	NONE
KK	2013-12-02	2013	december	4	15:06:00	15:12:00	00:06:00	NONE
KK	2013-12-02	2013	december	5	15:13:00	15:19:00	00:06:00	NONE
KK	2013-12-02	2013	december	1	15:22:00	15:27:00	00:05:00	NONE
KK	2013-12-02	2013	december	10	15:29:00	15:36:00	00:07:00	NONE
KK	2013-12-02	2013	december	7	15:38:00	15:49:00	00:11:00	none
KK	2013-12-02	2013	december	12	15:50:00	15:57:00	00:07:00	NONE
KK	2013-12-02	2013	december	3	15:59:00	16:06:00	00:07:00	NONE
KK	2013-12-02	2013	december	14	16:07:00	16:15:00	00:08:00	NONE
KK	2013-12-02	2013	december	8	16:15:00	16:22:00	00:07:00	NONE
CK	2013-12-03	2013	december	2	14:44:00	14:48:00	00:04:00	NONE
CK	2013-12-03	2013	december	4	14:49:00	14:59:00	00:10:00	none
CK	2013-12-03	2013	december	5	15:03:00	15:09:00	00:06:00	NONE
CK	2013-12-03	2013	december	1	15:14:00	15:19:00	00:05:00	NONE
CK	2013-12-03	2013	december	10	15:21:00	15:27:00	00:06:00	NONE
CK	2013-12-03	2013	december	7	15:28:00	15:35:00	00:07:00	NONE
CK	2013-12-03	2013	december	12	15:37:00	15:47:00	00:10:00	none
CK	2013-12-03	2013	december	3	15:49:00	15:55:00	00:06:00	NONE
CK	2013-12-03	2013	december	8	15:57:00	16:00:00	00:03:00	NONE
CK	2013-12-03	2013	december	14	16:00:00	16:05:00	00:05:00	NONE
CB	2013-12-03	2013	december	16	16:52:00	17:00:00	00:08:00	Dark-eyed Junco	D	feather pile
CB	2013-12-03	2013	december	15	16:44:00	16:52:00	00:08:00	none
CB	2013-12-03	2013	december	17	16:13:00	16:17:00	00:04:00	none
CB	2013-12-03	2013	december	26	16:19:00	16:25:00	00:06:00	none
CB	2013-12-03	2013	december	21	16:27:00	16:32:00	00:05:00	NONE
CB	2013-12-03	2013	december	20	16:32:00	16:36:00	00:04:00	none
CB	2013-12-03	2013	december	9	16:39:00	16:43:00	00:04:00	none
CB	2013-12-03	2013	december	23	17:04:00	17:07:00	00:03:00	none
CB	2013-12-03	2013	december	24	17:08:00	17:13:00	00:05:00	none
CB	2013-12-03	2013	december	27	17:16:00	17:19:00	00:03:00	none
CB	2013-12-05	2013	december	30	14:47:00	14:52:00	00:05:00	none		unknown single feather
CB	2013-12-05	2013	december	8	14:54:00	14:59:00	00:05:00	none
CB	2013-12-05	2013	december	14	14:59:00	15:02:00	00:03:00	none
CB	2013-12-05	2013	december	3	15:03:00	15:08:00	00:05:00	none
CB	2013-12-05	2013	december	10	15:11:00	15:20:00	00:09:00	none
CB	2013-12-05	2013	december	7	15:21:00	15:25:00	00:04:00	none
CB	2013-12-05	2013	december	12	15:31:00	15:34:00	00:03:00	none
CB	2013-12-05	2013	december	1	15:38:00	15:42:00	00:04:00	none
CB	2013-12-05	2013	december	2	15:43:00	15:49:00	00:06:00	none
CB	2013-12-05	2013	december	4	15:49:00	15:56:00	00:07:00	NONE
KK	2013-12-04	2013	december	17	14:58:00	15:05:00	00:07:00	NONE
KK	2013-12-04	2013	december	26	15:08:00	15:21:00	00:13:00	NONE
KK	2013-12-04	2013	december	20	15:24:00	15:31:00	00:07:00	NONE
KK	2013-12-04	2013	december	21	15:31:00	15:47:00	00:16:00	none
KK	2013-12-04	2013	december	9	15:51:00	15:57:00	00:06:00	NONE
KK	2013-12-04	2013	december	16	15:59:00	16:10:00	00:11:00	none
KK	2013-12-04	2013	december	15	16:10:00	16:20:00	00:10:00	NONE
KK	2013-12-04	2013	december	27	16:24:00	16:30:00	00:06:00	NONE
KK	2013-12-04	2013	december	24	16:31:00	16:39:00	00:08:00	NONE
KK	2013-12-04	2013	december	23	16:41:00	16:47:00	00:06:00	NONE
RMS	2013-12-04	2013	december	11	12:48:00	13:00:00	00:12:00	NONE
CK	2013-12-05	2013	december	15	14:58:00	15:13:00	00:15:00	none
CK	2013-12-05	2013	december	9	15:15:00	15:23:00	00:08:00	none
CK	2013-12-05	2013	december	21	15:28:00	15:35:00	00:07:00	none
CK	2013-12-05	2013	december	20	15:35:00	15:40:00	00:05:00	NONE
CK	2013-12-05	2013	december	26	15:45:00	15:52:00	00:07:00	NONE
CK	2013-12-05	2013	december	17	15:56:00	16:04:00	00:08:00	none
CK	2013-12-05	2013	december	23	16:08:00	16:13:00	00:05:00	none
CK	2013-12-05	2013	december	24	16:14:00	16:21:00	00:07:00	NONE
CK	2013-12-05	2013	december	27	16:24:00	16:27:00	00:03:00	NONE
KK	2013-12-09	2013	december	17	14:51:00	15:00:00	00:09:00	NONE
KK	2013-12-09	2013	december	26	15:02:00	15:14:00	00:12:00	NONE
KK	2013-12-09	2013	december	20	15:16:00	15:24:00	00:08:00	NONE
KK	2013-12-09	2013	december	21	15:24:00	15:32:00	00:08:00	NONE
KK	2013-12-09	2013	december	9	15:36:00	15:42:00	00:06:00	NONE
KK	2013-12-09	2013	december	16	15:43:00	15:50:00	00:07:00	NONE
KK	2013-12-09	2013	december	15	15:51:00	16:03:00	00:12:00	NONE
KK	2013-12-09	2013	december	27	16:08:00	16:15:00	00:07:00	NONE
KK	2013-12-09	2013	december	24	16:16:00	16:24:00	00:08:00	NONE
KK	2013-12-09	2013	december	23	16:27:00	16:34:00	00:07:00	NONE
CB	2013-12-10	2013	december	17	16:15:00	16:20:00	00:05:00	NONE
CB	2013-12-10	2013	december	26	16:22:00	16:27:00	00:05:00	NONE
CB	2013-12-10	2013	december	20	16:31:00	16:35:00	00:04:00	NONE
CB	2013-12-10	2013	december	21	16:35:00	16:38:00	00:03:00	NONE
CB	2013-12-10	2013	december	9	16:44:00	16:47:00	00:03:00	NONE
CB	2013-12-10	2013	december	15	16:48:00	16:54:00	00:06:00	NONE
CB	2013-12-10	2013	december	16	16:54:00	17:00:00	00:06:00	NONE
CB	2013-12-10	2013	december	23	17:04:00	17:07:00	00:03:00	NONE
CB	2013-12-10	2013	december	24	17:15:00	17:19:00	00:04:00	NONE
KK	2013-12-11	2013	december	2	15:07:00	15:15:00	00:08:00	NONE
KK	2013-12-11	2013	december	4	15:15:00	15:22:00	00:07:00	NONE
KK	2013-12-11	2013	december	1	15:24:00	15:31:00	00:07:00	NONE
KK	2013-12-11	2013	december	10	15:32:00	15:40:00	00:08:00	NONE
KK	2013-12-11	2013	december	7	15:41:00	15:56:00	00:15:00	Golden Crowned Kinglet	D
KK	2013-12-11	2013	december	12	15:57:00	16:05:00	00:08:00	NONE
KK	2013-12-11	2013	december	3	16:09:00	16:16:00	00:07:00	NONE
KK	2013-12-11	2013	december	14	16:17:00	16:24:00	00:07:00	NONE
KK	2013-12-11	2013	december	8	16:24:00	16:30:00	00:06:00	NONE
RMS	2013-12-13	2013	december	11	15:48:00	15:57:00	00:09:00	NONE
CB	2013-12-15	2013	december	17	14:00:00	14:05:00	00:05:00	NONE
CB	2013-12-15	2013	december	26	14:06:00	14:11:00	00:05:00	NONE
CB	2013-12-15	2013	december	21	14:12:00	14:17:00	00:05:00	NONE
CB	2013-12-15	2013	december	20	14:17:00	14:21:00	00:04:00	NONE
CB	2013-12-15	2013	december	9	14:23:00	14:27:00	00:04:00	NONE
CB	2013-12-15	2013	december	15	14:28:00	14:33:00	00:05:00	NONE
CB	2013-12-15	2013	december	16	14:33:00	14:37:00	00:04:00	NONE
CB	2013-12-15	2013	december	23	14:40:00	14:44:00	00:04:00	NONE
CB	2013-12-15	2013	december	24	14:45:00	14:49:00	00:04:00	NONE
CB	2013-12-15	2013	december	27	14:49:00	14:52:00	00:03:00	NONE
KK	2013-12-16	2013	december	2	15:13:00	15:21:00	00:08:00	NONE
KK	2013-12-16	2013	december	4	15:21:00	15:37:00	00:16:00	Dark-eyed junco	A
KK	2013-12-16	2013	december	1	15:28:00	15:46:00	00:18:00	NONE
KK	2013-12-16	2013	december	10	15:47:00	15:55:00	00:08:00	NONE
KK	2013-12-16	2013	december	7	15:56:00	16:04:00	00:08:00	NONE
KK	2013-12-16	2013	december	12	16:05:00	16:14:00	00:09:00	NONE
KK	2013-12-16	2013	december	3	16:15:00	16:22:00	00:07:00	NONE
KK	2013-12-16	2013	december	14	16:23:00	16:30:00	00:07:00	NONE
KK	2013-12-16	2013	december	8	16:30:00	16:36:00	00:06:00	NONE
CB	2013-12-17	2013	december	17	15:51:00	15:57:00	00:06:00	NONE
CB	2013-12-17	2013	december	26	15:59:00	16:06:00	00:07:00	NONE
CB	2013-12-17	2013	december	20	16:09:00	16:13:00	00:04:00	NONE
CB	2013-12-17	2013	december	21	16:13:00	16:18:00	00:05:00	NONE
CB	2013-12-17	2013	december	9	16:20:00	16:25:00	00:05:00	NONE
CB	2013-12-17	2013	december	15	16:26:00	16:32:00	00:06:00	NONE
CB	2013-12-17	2013	december	16	16:32:00	16:37:00	00:05:00	NONE
CB	2013-12-17	2013	december	23	16:42:00	16:45:00	00:03:00	NONE
CB	2013-12-17	2013	december	24	16:46:00	16:51:00	00:05:00	NONE
CB	2013-12-17	2013	december	27	16:53:00	16:56:00	00:03:00	NONE
RMS	2013-12-17	2013	december	11	13:21:00	13:29:00	00:08:00	NONE
CB	2013-12-19	2013	december	17	16:27:00	16:32:00	00:05:00	NONE
CB	2013-12-19	2013	december	26	16:34:00	16:40:00	00:06:00	NONE
CB	2013-12-19	2013	december	20	16:43:00	16:47:00	00:04:00	NONE
CB	2013-12-19	2013	december	21	16:47:00	16:51:00	00:04:00	NONE
CB	2013-12-19	2013	december	9	16:53:00	16:57:00	00:04:00	NONE
CB	2013-12-19	2013	december	15	16:57:00	17:02:00	00:05:00	NONE
CB	2013-12-19	2013	december	16	17:02:00	17:07:00	00:05:00	NONE
CB	2013-12-19	2013	december	23	17:12:00	17:15:00	00:03:00	NONE
CB	2013-12-19	2013	december	24	17:15:00	17:20:00	00:05:00	NONE
CB	2013-12-19	2013	december	27	17:22:00	17:25:00	00:03:00	NONE
RMS	2014-01-02	2014	january	11	13:23:00	13:31:00	00:08:00	NONE
RMS	2014-01-03	2014	january	11	13:36:00	13:43:00	00:07:00	NONE
KK	2014-01-06	2014	january	2	14:35:00	14:40:00	00:05:00	NONE
KK	2014-01-06	2014	january	4	14:41:00	14:46:00	00:05:00	NONE
KK	2014-01-06	2014	january	1	14:48:00	14:53:00	00:05:00	NONE
KK	2014-01-06	2014	january	10	14:55:00	15:02:00	00:07:00	NONE
KK	2014-01-06	2014	january	7	15:03:00	15:13:00	00:10:00	NONE
KK	2014-01-06	2014	january	12	15:15:00	15:21:00	00:06:00	NONE
KK	2014-01-06	2014	january	3	15:24:00	15:31:00	00:07:00	NONE
KK	2014-01-06	2014	january	14	15:32:00	15:38:00	00:06:00	NONE
KK	2014-01-06	2014	january	8	15:38:00	15:43:00	00:05:00	NONE
KK	2014-01-08	2014	january	17	14:43:00	14:52:00	00:09:00	NONE
KK	2014-01-08	2014	january	26	14:55:00	15:06:00	00:11:00	NONE
KK	2014-01-08	2014	january	20	15:09:00	15:16:00	00:07:00	NONE
KK	2014-01-08	2014	january	21	15:16:00	15:23:00	00:07:00	NONE
KK	2014-01-08	2014	january	9	15:26:00	15:33:00	00:07:00	NONE
KK	2014-01-08	2014	january	16	15:34:00	15:47:00	00:13:00	none
KK	2014-01-08	2014	january	15	15:47:00	15:59:00	00:12:00	NONE
KK	2014-01-08	2014	january	27	16:03:00	16:09:00	00:06:00	NONE
KK	2014-01-08	2014	january	24	16:10:00	16:19:00	00:09:00	NONE
KK	2014-01-08	2014	january	23	16:23:00	16:30:00	00:07:00	NONE
CB	2014-01-09	2014	january	2	15:58:00	16:01:00	00:03:00	NONE
CB	2014-01-09	2014	january	4	16:01:00	16:05:00	00:04:00	NONE
CB	2014-01-09	2014	january	1	16:06:00	16:08:00	00:02:00	NONE
CB	2014-01-09	2014	january	10	16:12:00	16:16:00	00:04:00	NONE
CB	2014-01-09	2014	january	7	16:17:00	16:27:00	00:10:00	Golden-crowned kinglet	C
CB	2014-01-09	2014	january	12	16:28:00	16:33:00	00:05:00	NONE
CB	2014-01-09	2014	january	8	16:41:00	16:45:00	00:04:00	NONE
CB	2014-01-09	2014	january	14	16:45:00	16:49:00	00:04:00	NONE
CB	2014-01-09	2014	january	3	16:49:00	16:54:00	00:05:00	NONE
CB	2014-01-09	2014	january	30	16:58:00	17:02:00	00:04:00	NONE
RMS	2014-01-09	2014	january	11	13:21:00	13:30:00	00:09:00	NONE
RMS	2014-01-10	2014	january	11	13:21:00	13:30:00	00:09:00	NONE
CB	2014-01-12	2014	january	17	14:42:00	14:49:00	00:07:00	NONE
CB	2014-01-12	2014	january	26	14:52:00	14:58:00	00:06:00	NONE
CB	2014-01-12	2014	january	20	15:00:00	15:05:00	00:05:00	NONE
CB	2014-01-12	2014	january	21	15:05:00	15:10:00	00:05:00	NONE
CB	2014-01-12	2014	january	9	15:13:00	15:17:00	00:04:00	NONE
CB	2014-01-12	2014	january	15	15:17:00	15:22:00	00:05:00	NONE
CB	2014-01-12	2014	january	16	15:22:00	15:27:00	00:05:00	NONE
CB	2014-01-12	2014	january	23	15:36:00	15:38:00	00:02:00	NONE
CB	2014-01-12	2014	january	24	15:40:00	15:44:00	00:04:00	NONE
CB	2014-01-12	2014	january	27	15:46:00	15:49:00	00:03:00	NONE
KK	2014-01-13	2014	january	2	15:24:00	15:30:00	00:06:00	NONE
KK	2014-01-13	2014	january	4	15:31:00	15:36:00	00:05:00	NONE
KK	2014-01-13	2014	january	1	15:37:00	15:43:00	00:06:00	NONE
KK	2014-01-13	2014	january	10	15:45:00	15:52:00	00:07:00	NONE
KK	2014-01-13	2014	january	7	15:54:00	16:04:00	00:10:00	none		same GCKI, C
KK	2014-01-13	2014	january	12	16:06:00	16:13:00	00:07:00	NONE
KK	2014-01-13	2014	january	3	16:15:00	16:21:00	00:06:00	NONE
KK	2014-01-13	2014	january	14	16:23:00	16:28:00	00:05:00	NONE
KK	2014-01-13	2014	january	8	16:28:00	16:34:00	00:06:00	NONE
CB	2014-01-14	2014	january	30	13:34:00	13:38:00	00:04:00	NONE
CB	2014-01-14	2014	january	8	13:43:00	13:44:00	00:01:00	NONE
CB	2014-01-14	2014	january	14	13:45:00	13:49:00	00:04:00	NONE
CB	2014-01-14	2014	january	3	13:49:00	13:55:00	00:06:00	NONE
CB	2014-01-14	2014	january	10	13:58:00	14:03:00	00:05:00	NONE
CB	2014-01-14	2014	january	12	14:08:00	14:11:00	00:03:00	NONE
CB	2014-01-14	2014	january	7	14:12:00	14:16:00	00:04:00	NONE		carcass still there from last survey (gc kinglet)
CB	2014-01-14	2014	january	1	14:19:00	14:22:00	00:03:00	NONE
CB	2014-01-14	2014	january	2	14:22:00	14:25:00	00:03:00	NONE
CB	2014-01-14	2014	january	4	14:25:00	14:29:00	00:04:00	NONE
KK	2014-01-15	2014	january	17	14:26:00	14:35:00	00:09:00	NONE
KK	2014-01-15	2014	january	26	14:39:00	14:51:00	00:12:00	NONE
KK	2014-01-15	2014	january	20	14:54:00	15:00:00	00:06:00	NONE
KK	2014-01-15	2014	january	21	15:00:00	15:07:00	00:07:00	NONE
KK	2014-01-15	2014	january	9	15:11:00	15:16:00	00:05:00	NONE
KK	2014-01-15	2014	january	16	15:17:00	15:25:00	00:08:00	NONE
KK	2014-01-15	2014	january	15	15:25:00	15:50:00	00:25:00	none
KK	2014-01-15	2014	january	27	15:54:00	16:00:00	00:06:00	NONE
KK	2014-01-15	2014	january	24	16:01:00	16:09:00	00:08:00	NONE
KK	2014-01-15	2014	january	23	16:12:00	16:17:00	00:05:00	NONE
CB	2014-01-16	2014	january	7	15:31:00	15:36:00	00:05:00	NONE
CB	2014-01-16	2014	january	1	15:38:00	15:41:00	00:03:00	NONE
CB	2014-01-16	2014	january	2	15:43:00	15:46:00	00:03:00	NONE
CB	2014-01-16	2014	january	4	15:46:00	15:50:00	00:04:00	NONE
CB	2014-01-16	2014	january	10	15:52:00	15:57:00	00:05:00	NONE
CB	2014-01-16	2014	january	12	15:59:00	16:03:00	00:04:00	NONE		crow feather, D
CB	2014-01-16	2014	january	3	16:11:00	16:17:00	00:06:00	NONE
CB	2014-01-16	2014	january	14	16:17:00	16:21:00	00:04:00	NONE
CB	2014-01-16	2014	january	8	16:21:00	16:23:00	00:02:00	NONE
CB	2014-01-16	2014	january	30	16:26:00	16:32:00	00:06:00	NONE
RMS	2014-01-17	2014	january	11	15:41:00	15:51:00	00:10:00	NONE
CB	2014-01-19	2014	january	17	14:10:00	14:15:00	00:05:00	NONE
CB	2014-01-19	2014	january	26	14:17:00	14:23:00	00:06:00	NONE
CB	2014-01-19	2014	january	20	14:25:00	14:30:00	00:05:00	NONE
CB	2014-01-19	2014	january	21	14:30:00	14:34:00	00:04:00	NONE
CB	2014-01-19	2014	january	9	14:37:00	14:41:00	00:04:00	NONE
CB	2014-01-19	2014	january	15	14:42:00	14:47:00	00:05:00	NONE
CB	2014-01-19	2014	january	16	14:47:00	14:52:00	00:05:00	NONE
CB	2014-01-19	2014	january	23	14:57:00	15:00:00	00:03:00	NONE
CB	2014-01-19	2014	january	24	15:01:00	15:06:00	00:05:00	NONE
CB	2014-01-19	2014	january	27	15:08:00	15:10:00	00:02:00	NONE
KK	2014-01-20	2014	january	2	15:24:00	15:30:00	00:06:00	NONE
KK	2014-01-20	2014	january	4	15:31:00	15:36:00	00:05:00	NONE
KK	2014-01-20	2014	january	1	15:37:00	15:43:00	00:06:00	NONE
KK	2014-01-20	2014	january	10	15:45:00	15:52:00	00:07:00	NONE
KK	2014-01-20	2014	january	7	15:54:00	16:04:00	00:10:00	NONE
KK	2014-01-20	2014	january	12	16:06:00	16:13:00	00:07:00	NONE
KK	2014-01-20	2014	january	3	16:15:00	16:21:00	00:06:00	NONE
KK	2014-01-20	2014	january	14	16:23:00	16:28:00	00:05:00	NONE
KK	2014-01-20	2014	january	8	16:28:00	16:34:00	00:06:00	NONE
KK	2014-01-22	2014	january	17	14:54:00	15:01:00	00:07:00	NONE
KK	2014-01-22	2014	january	26	15:06:00	15:17:00	00:11:00	NONE
KK	2014-01-22	2014	january	20	15:23:00	15:30:00	00:07:00	NONE
KK	2014-01-22	2014	january	21	15:30:00	15:38:00	00:08:00	NONE
KK	2014-01-22	2014	january	9	15:42:00	15:50:00	00:08:00	NONE
KK	2014-01-22	2014	january	16	15:51:00	16:02:00	00:11:00	NONE
KK	2014-01-22	2014	january	15	16:02:00	16:12:00	00:10:00	NONE
KK	2014-01-22	2014	january	27	16:16:00	16:23:00	00:07:00	NONE
KK	2014-01-22	2014	january	24	16:25:00	16:33:00	00:08:00	NONE
KK	2014-01-22	2014	january	23	16:36:00	16:42:00	00:06:00	NONE
CB	2014-01-23	2014	january	1	16:08:00	16:11:00	00:03:00	NONE
CB	2014-01-23	2014	january	2	16:12:00	16:15:00	00:03:00	NONE
CB	2014-01-23	2014	january	4	16:15:00	16:19:00	00:04:00	NONE
CB	2014-01-23	2014	january	10	16:22:00	16:26:00	00:04:00	NONE
CB	2014-01-23	2014	january	7	16:27:00	16:32:00	00:05:00	NONE
CB	2014-01-23	2014	january	12	16:33:00	16:37:00	00:04:00	NONE
CB	2014-01-23	2014	january	3	16:43:00	16:48:00	00:05:00	NONE
CB	2014-01-23	2014	january	14	16:48:00	16:51:00	00:03:00	NONE
CB	2014-01-23	2014	january	8	16:51:00	16:53:00	00:02:00	NONE
CB	2014-01-23	2014	january	30	16:56:00	17:02:00	00:06:00	none
RMS	2014-01-23	2014	january	11	15:46:00	15:53:00	00:07:00	NONE
RMS	2014-01-24	2014	january	11	15:44:00	15:52:00	00:08:00	NONE
KK	2014-01-27	2014	january	2	12:49:00	12:55:00	00:06:00	NONE
KK	2014-01-27	2014	january	4	12:56:00	13:02:00	00:06:00	NONE
KK	2014-01-27	2014	january	1	13:03:00	13:08:00	00:05:00	NONE
KK	2014-01-27	2014	january	10	13:10:00	13:16:00	00:06:00	NONE
KK	2014-01-27	2014	january	7	13:17:00	13:25:00	00:08:00	NONE
KK	2014-01-27	2014	january	12	13:27:00	13:35:00	00:08:00	NONE
KK	2014-01-27	2014	january	3	13:38:00	13:45:00	00:07:00	NONE
KK	2014-01-27	2014	january	14	13:46:00	13:53:00	00:07:00	NONE
KK	2014-01-27	2014	january	8	13:53:00	13:58:00	00:05:00	NONE
RMS	2014-01-27	2014	january	11	15:50:00	15:57:00	00:07:00	NONE
CB	2014-01-28	2014	january	17	16:03:00	16:08:00	00:05:00	NONE
CB	2014-01-28	2014	january	26	16:11:00	16:17:00	00:06:00	NONE
CB	2014-01-28	2014	january	20	16:19:00	16:23:00	00:04:00	NONE
CB	2014-01-28	2014	january	21	16:23:00	16:29:00	00:06:00	NONE
CB	2014-01-28	2014	january	9	16:36:00	16:40:00	00:04:00	NONE
CB	2014-01-28	2014	january	15	16:41:00	16:47:00	00:06:00	NONE
CB	2014-01-28	2014	january	16	16:47:00	16:53:00	00:06:00	NONE
CB	2014-01-28	2014	january	23	17:03:00	17:05:00	00:02:00	NONE
CB	2014-01-28	2014	january	24	17:06:00	17:11:00	00:05:00	NONE
CB	2014-01-28	2014	january	27	17:12:00	17:15:00	00:03:00	NONE
RMS	2014-01-31	2014	january	11	15:55:00	16:02:00	00:07:00	NONE
KK	2014-02-03	2014	february	2	14:35:00	14:40:00	00:05:00	NONE
KK	2014-02-03	2014	february	4	14:41:00	14:46:00	00:05:00	NONE
KK	2014-02-03	2014	february	1	14:47:00	15:03:00	00:16:00	Eastern Towhee	D
KK	2014-02-03	2014	february	10	15:06:00	15:12:00	00:06:00	NONE
KK	2014-02-03	2014	february	7	15:13:00	15:19:00	00:06:00	NONE
KK	2014-02-03	2014	february	12	15:21:00	15:27:00	00:06:00	NONE
KK	2014-02-03	2014	february	3	15:29:00	15:35:00	00:06:00	NONE
KK	2014-02-03	2014	february	14	15:36:00	15:41:00	00:05:00	NONE
KK	2014-02-03	2014	february	8	15:41:00	15:45:00	00:04:00	NONE
RMS	2014-02-03	2014	february	11	15:56:00	16:03:00	00:07:00	NONE
CB	2014-02-04	2014	february	17	16:18:00	16:23:00	00:05:00	NONE
CB	2014-02-04	2014	february	26	16:24:00	16:33:00	00:09:00	NONE
CB	2014-02-04	2014	february	20	16:35:00	16:41:00	00:06:00	NONE
CB	2014-02-04	2014	february	21	16:41:00	16:46:00	00:05:00	NONE
CB	2014-02-04	2014	february	9	16:48:00	16:52:00	00:04:00	NONE
CB	2014-02-04	2014	february	15	16:52:00	17:00:00	00:08:00	NONE
CB	2014-02-04	2014	february	16	17:00:00	17:08:00	00:08:00	NONE
CB	2014-02-04	2014	february	23	17:11:00	17:14:00	00:03:00	NONE
CB	2014-02-04	2014	february	24	17:15:00	17:20:00	00:05:00	NONE
CB	2014-02-04	2014	february	27	17:21:00	17:23:00	00:02:00	NONE
RMS	2014-02-04	2014	february	11	15:53:00	16:00:00	00:07:00	NONE
KK	2014-02-05	2014	february	17	10:59:00	11:06:00	00:07:00	NONE
KK	2014-02-05	2014	february	26	11:10:00	11:23:00	00:13:00	NONE
KK	2014-02-05	2014	february	20	11:27:00	11:36:00	00:09:00	NONE
KK	2014-02-05	2014	february	21	11:36:00	11:44:00	00:08:00	NONE
KK	2014-02-05	2014	february	9	11:47:00	11:53:00	00:06:00	NONE
KK	2014-02-05	2014	february	16	11:55:00	12:01:00	00:06:00	NONE
KK	2014-02-05	2014	february	15	12:01:00	12:12:00	00:11:00	NONE
KK	2014-02-05	2014	february	27	12:16:00	12:22:00	00:06:00	NONE
KK	2014-02-05	2014	february	24	12:23:00	12:30:00	00:07:00	NONE
KK	2014-02-05	2014	february	23	12:33:00	12:37:00	00:04:00	NONE
CB	2014-02-06	2014	february	17	16:00:00	16:05:00	00:05:00	NONE
CB	2014-02-06	2014	february	26	16:07:00	16:16:00	00:09:00	NONE
CB	2014-02-06	2014	february	20	16:19:00	16:24:00	00:05:00	NONE
CB	2014-02-06	2014	february	21	16:24:00	16:29:00	00:05:00	NONE
CB	2014-02-06	2014	february	9	16:35:00	16:38:00	00:03:00	NONE
CB	2014-02-06	2014	february	15	16:39:00	16:46:00	00:07:00	NONE
CB	2014-02-06	2014	february	16	16:46:00	16:52:00	00:06:00	nONE
CB	2014-02-06	2014	february	23	17:00:00	17:03:00	00:03:00	NONE
CB	2014-02-06	2014	february	24	17:04:00	17:10:00	00:06:00	NONE
CB	2014-02-06	2014	february	27	17:12:00	17:15:00	00:03:00	NONE
CB	2014-02-09	2014	february	1	16:18:00	16:22:00	00:04:00	none		small grey feather, D
CB	2014-02-09	2014	february	2	16:24:00	16:27:00	00:03:00	NONE
CB	2014-02-09	2014	february	4	16:27:00	16:32:00	00:05:00	NONE
CB	2014-02-09	2014	february	10	16:35:00	16:47:00	00:12:00	none
CB	2014-02-09	2014	february	12	16:47:00	16:53:00	00:06:00	NONE
CB	2014-02-09	2014	february	7	16:53:00	17:00:00	00:07:00	none		Med grey feather, B
CB	2014-02-09	2014	february	8	17:04:00	17:06:00	00:02:00	NONE
CB	2014-02-09	2014	february	14	17:06:00	17:12:00	00:06:00	none		small feather, grey, white tip, 4 ft from wall, A
CB	2014-02-09	2014	february	3	17:12:00	17:17:00	00:05:00	NONE
CB	2014-02-09	2014	february	30	17:20:00	17:25:00	00:05:00	NONE
KK	2014-02-10	2014	february	2	11:49:00	11:55:00	00:06:00	NONE
KK	2014-02-10	2014	february	4	11:55:00	12:00:00	00:05:00	NONE
KK	2014-02-10	2014	february	1	12:01:00	12:06:00	00:05:00	NONE
KK	2014-02-10	2014	february	10	12:10:00	12:16:00	00:06:00	NONE
KK	2014-02-10	2014	february	7	12:17:00	12:25:00	00:08:00	NONE
KK	2014-02-10	2014	february	12	12:27:00	12:34:00	00:07:00	NONE
KK	2014-02-10	2014	february	3	12:36:00	12:42:00	00:06:00	NONE
KK	2014-02-10	2014	february	14	12:43:00	12:48:00	00:05:00	NONE
KK	2014-02-10	2014	february	8	12:48:00	12:52:00	00:04:00	NONE
RMS	2014-02-10	2014	february	11	15:53:00	16:02:00	00:09:00	NONE
CB	2014-02-11	2014	february	17	16:16:00	16:22:00	00:06:00	NONE
CB	2014-02-11	2014	february	26	16:24:00	16:33:00	00:09:00	NONE
CB	2014-02-11	2014	february	20	16:36:00	16:41:00	00:05:00	NONE
CB	2014-02-11	2014	february	21	16:41:00	16:46:00	00:05:00	NONE
CB	2014-02-11	2014	february	9	16:51:00	16:55:00	00:04:00	NONE
CB	2014-02-11	2014	february	15	16:56:00	17:02:00	00:06:00	NONE
CB	2014-02-11	2014	february	16	17:02:00	17:07:00	00:05:00	NONE
CB	2014-02-11	2014	february	23	17:15:00	17:18:00	00:03:00	NONE
CB	2014-02-11	2014	february	24	17:19:00	17:25:00	00:06:00	NONE
CB	2014-02-11	2014	february	27	17:26:00	17:28:00	00:02:00	NONE
KK	2014-02-17	2014	february	2	14:12:00	14:17:00	00:05:00	NONE
KK	2014-02-17	2014	february	4	14:18:00	14:26:00	00:08:00	NONE
KK	2014-02-17	2014	february	1	14:28:00	14:34:00	00:06:00	NONE
KK	2014-02-17	2014	february	10	14:37:00	14:55:00	00:18:00	none
KK	2014-02-17	2014	february	7	14:58:00	15:06:00	00:08:00	NONE
KK	2014-02-17	2014	february	12	15:09:00	15:30:00	00:21:00	none
KK	2014-02-17	2014	february	14	15:48:00	15:53:00	00:05:00	NONE
KK	2014-02-17	2014	february	8	15:54:00	15:58:00	00:04:00	NONE
KK	2014-02-19	2014	february	17	11:36:00	11:41:00	00:05:00	NONE
KK	2014-02-19	2014	february	26	11:45:00	11:54:00	00:09:00	NONE
KK	2014-02-19	2014	february	20	11:58:00	12:04:00	00:06:00	NONE
KK	2014-02-19	2014	february	21	12:04:00	12:11:00	00:07:00	NONE
KK	2014-02-19	2014	february	9	12:15:00	12:21:00	00:06:00	NONE
KK	2014-02-19	2014	february	16	12:23:00	12:30:00	00:07:00	NONE
KK	2014-02-19	2014	february	15	12:30:00	12:40:00	00:10:00	NONE
KK	2014-02-19	2014	february	27	12:45:00	12:50:00	00:05:00	NONE
KK	2014-02-19	2014	february	24	12:51:00	12:59:00	00:08:00	NONE
KK	2014-02-19	2014	february	23	13:01:00	13:06:00	00:05:00	NONE
CB	2014-02-20	2014	february	1	16:21:00	16:27:00	00:06:00	none		feathers on window- grey/tan/white , D
CB	2014-02-20	2014	february	2	16:28:00	16:31:00	00:03:00	NONE
CB	2014-02-20	2014	february	4	16:31:00	16:36:00	00:05:00	NONE
CB	2014-02-20	2014	february	10	16:38:00	16:45:00	00:07:00	NONE
CB	2014-02-20	2014	february	12	16:46:00	16:55:00	00:09:00	NONE
CB	2014-02-20	2014	february	7	16:56:00	17:01:00	00:05:00	unknown	E	feather pile
CB	2014-02-20	2014	february	3	17:04:00	17:10:00	00:06:00	NONE
CB	2014-02-20	2014	february	14	17:10:00	17:16:00	00:06:00	NONE
CB	2014-02-20	2014	february	8	17:16:00	17:19:00	00:03:00	NONE
CB	2014-02-20	2014	february	30	17:22:00	17:26:00	00:04:00	NONE
CB	2014-02-23	2014	february	17	14:04:00	14:09:00	00:05:00	NONE
CB	2014-02-23	2014	february	26	14:12:00	14:19:00	00:07:00	NONE
CB	2014-02-23	2014	february	20	14:21:00	14:26:00	00:05:00	NONE
CB	2014-02-23	2014	february	21	14:27:00	14:33:00	00:06:00	NONE
CB	2014-02-23	2014	february	15	14:36:00	14:43:00	00:07:00	NONE
CB	2014-02-23	2014	february	16	14:43:00	14:50:00	00:07:00	nONE
CB	2014-02-23	2014	february	9	14:51:00	14:55:00	00:04:00	NONE
CB	2014-02-23	2014	february	27	14:59:00	15:03:00	00:04:00	NONE
CB	2014-02-23	2014	february	24	15:04:00	15:09:00	00:05:00	NONE
CB	2014-02-23	2014	february	23	15:11:00	15:14:00	00:03:00	NONE
KK	2014-02-24	2014	february	2	10:58:00	11:03:00	00:05:00	NONE
KK	2014-02-24	2014	february	4	11:03:00	11:07:00	00:04:00	NONE
KK	2014-02-24	2014	february	1	11:08:00	11:14:00	00:06:00	NONE
KK	2014-02-24	2014	february	10	11:15:00	11:20:00	00:05:00	NONE
KK	2014-02-24	2014	february	7	11:21:00	11:29:00	00:08:00	NONE
KK	2014-02-24	2014	february	12	11:30:00	11:36:00	00:06:00	NONE
KK	2014-02-24	2014	february	3	11:38:00	11:44:00	00:06:00	NONE
KK	2014-02-24	2014	february	14	11:45:00	11:50:00	00:05:00	NONE
KK	2014-02-24	2014	february	8	11:50:00	11:55:00	00:05:00	NONE
KK	2014-02-26	2014	february	17	10:38:00	10:47:00	00:09:00	NONE
KK	2014-02-26	2014	february	26	10:51:00	11:02:00	00:11:00	NONE
KK	2014-02-26	2014	february	20	11:06:00	11:13:00	00:07:00	NONE
KK	2014-02-26	2014	february	21	11:15:00	11:22:00	00:07:00	NONE
KK	2014-02-26	2014	february	9	11:26:00	11:34:00	00:08:00	NONE
KK	2014-02-26	2014	february	16	11:35:00	11:42:00	00:07:00	NONE
KK	2014-02-26	2014	february	15	11:42:00	12:00:00	00:18:00	none
KK	2014-02-26	2014	february	27	12:04:00	12:08:00	00:04:00	NONE
KK	2014-02-26	2014	february	24	12:09:00	12:24:00	00:15:00	Ruby-crowned Kinglet	C
KK	2014-02-26	2014	february	23	12:00:00	12:33:00	00:33:00	NONE
RMS	2014-02-28	2014	february	11	15:44:00	15:52:00	00:08:00	NONE
CB	2014-03-04	2014	march	17	15:53:00	15:59:00	00:06:00	NONE
CB	2014-03-04	2014	march	26	16:03:00	16:12:00	00:09:00	NONE
CB	2014-03-04	2014	march	20	16:14:00	16:22:00	00:08:00	NONE
CB	2014-03-04	2014	march	21	16:22:00	16:27:00	00:05:00	NONE
CB	2014-03-04	2014	march	9	16:30:00	16:35:00	00:05:00	NONE
CB	2014-03-04	2014	march	15	16:36:00	16:41:00	00:05:00	NONE
CB	2014-03-04	2014	march	16	16:41:00	16:47:00	00:06:00	nONE
CB	2014-03-04	2014	march	23	16:50:00	16:54:00	00:04:00	NONE
CB	2014-03-04	2014	march	24	16:56:00	17:01:00	00:05:00	NONE
CB	2014-03-07	2014	march	7	16:24:00	16:28:00	00:04:00	NONE
CB	2014-03-07	2014	march	12	16:30:00	16:35:00	00:05:00	NONE
CB	2014-03-07	2014	march	10	16:36:00	16:41:00	00:05:00	NONE
CB	2014-03-07	2014	march	1	16:44:00	16:47:00	00:03:00	NONE
CB	2014-03-07	2014	march	2	16:48:00	16:51:00	00:03:00	NONE
CB	2014-03-07	2014	march	4	16:51:00	16:56:00	00:05:00	NONE
CB	2014-03-07	2014	march	8	17:04:00	17:06:00	00:02:00	NONE
CB	2014-03-07	2014	march	14	17:07:00	17:12:00	00:05:00	NONE
CB	2014-03-07	2014	march	3	17:12:00	17:17:00	00:05:00	NONE
CB	2014-03-07	2014	march	30	17:22:00	17:27:00	00:05:00	NONE
RMS	2014-03-07	2014	march	11	15:49:00	15:55:00	00:06:00	NONE
KK	2014-03-10	2014	march	2	15:22:00	15:27:00	00:05:00	NONE
KK	2014-03-10	2014	march	4	15:28:00	15:33:00	00:05:00	NONE
KK	2014-03-10	2014	march	1	15:35:00	15:40:00	00:05:00	NONE
KK	2014-03-10	2014	march	10	15:41:00	15:47:00	00:06:00	NONE
KK	2014-03-10	2014	march	7	15:48:00	16:00:00	00:12:00	none
KK	2014-03-10	2014	march	12	16:02:00	16:11:00	00:09:00	none
KK	2014-03-10	2014	march	3	16:13:00	16:18:00	00:05:00	NONE
KK	2014-03-10	2014	march	14	16:19:00	16:24:00	00:05:00	NONE
KK	2014-03-10	2014	march	8	16:24:00	16:28:00	00:04:00	NONE
CB	2014-03-11	2014	march	26	15:49:00	15:55:00	00:06:00	NONE
CB	2014-03-11	2014	march	20	15:58:00	16:02:00	00:04:00	NONE
CB	2014-03-11	2014	march	21	16:02:00	16:11:00	00:09:00	none
CB	2014-03-11	2014	march	17	16:13:00	16:19:00	00:06:00	NONE
CB	2014-03-11	2014	march	9	16:23:00	16:27:00	00:04:00	NONE
CB	2014-03-11	2014	march	15	16:28:00	16:39:00	00:11:00	none
CB	2014-03-11	2014	march	16	16:39:00	16:50:00	00:11:00	nONE
CB	2014-03-11	2014	march	23	16:58:00	17:02:00	00:04:00	NONE
CB	2014-03-11	2014	march	24	17:03:00	17:09:00	00:06:00	NONE
CB	2014-03-11	2014	march	27	17:10:00	17:13:00	00:03:00	NONE
RMS	2014-03-11	2014	march	11	15:53:00	15:59:00	00:06:00	NONE
KK	2014-03-12	2014	march	17	12:30:00	12:36:00	00:06:00	NONE
KK	2014-03-12	2014	march	26	12:40:00	12:51:00	00:11:00	none
KK	2014-03-12	2014	march	20	12:54:00	13:00:00	00:06:00	NONE
KK	2014-03-12	2014	march	21	13:00:00	13:15:00	00:15:00	Eastern bluebird	A
KK	2014-03-12	2014	march	x	x	x	x	Dark-eyed Junco	A
KK	2014-03-12	2014	march	9	13:20:00	13:25:00	00:05:00	NONE
KK	2014-03-12	2014	march	16	13:27:00	13:33:00	00:06:00	NONE
KK	2014-03-12	2014	march	15	13:33:00	13:40:00	00:07:00	NONE
KK	2014-03-12	2014	march	27	13:45:00	13:50:00	00:05:00	NONE
KK	2014-03-12	2014	march	24	13:51:00	13:57:00	00:06:00	NONE
KK	2014-03-12	2014	march	23	13:59:00	14:04:00	00:05:00	NONE
CB	2014-03-13	2014	march	1	16:03:00	16:06:00	00:03:00	NONE
CB	2014-03-13	2014	march	2	16:06:00	16:09:00	00:03:00	NONE
CB	2014-03-13	2014	march	4	16:09:00	16:13:00	00:04:00	NONE
CB	2014-03-13	2014	march	10	16:16:00	16:21:00	00:05:00	NONE
CB	2014-03-13	2014	march	12	16:21:00	16:27:00	00:06:00	NONE		New feeder side D
CB	2014-03-13	2014	march	7	16:28:00	16:33:00	00:05:00	NONE
CB	2014-03-13	2014	march	3	16:39:00	16:48:00	00:09:00	NONE
CB	2014-03-13	2014	march	14	16:48:00	16:55:00	00:07:00	NONE
CB	2014-03-13	2014	march	8	16:55:00	16:59:00	00:04:00	NONE
CB	2014-03-13	2014	march	30	17:03:00	17:08:00	00:05:00	NONE
RMS	2014-03-13	2014	march	11	16:07:00	16:13:00	00:06:00	NONE
CB	2014-03-16	2014	march	17	15:40:00	15:46:00	00:06:00	NONE
CB	2014-03-16	2014	march	26	15:48:00	15:57:00	00:09:00	NONE
CB	2014-03-16	2014	march	20	16:00:00	16:06:00	00:06:00	NONE
CB	2014-03-16	2014	march	21	16:06:00	16:18:00	00:12:00	white-throated sparrow	D
CB	2014-03-16	2014	march	15	16:25:00	16:31:00	00:06:00	NONE
CB	2014-03-16	2014	march	16	16:31:00	16:37:00	00:06:00	NONE
KK	2014-03-17	2014	march	2	12:31:00	12:36:00	00:05:00	NONE
KK	2014-03-17	2014	march	4	12:37:00	12:43:00	00:06:00	NONE
KK	2014-03-17	2014	march	1	12:45:00	12:49:00	00:04:00	NONE
KK	2014-03-17	2014	march	10	12:52:00	12:57:00	00:05:00	NONE
KK	2014-03-17	2014	march	7	12:59:00	13:05:00	00:06:00	NONE
KK	2014-03-17	2014	march	12	13:07:00	13:14:00	00:07:00	NONE
KK	2014-03-17	2014	march	3	13:15:00	13:21:00	00:06:00	NONE
KK	2014-03-17	2014	march	14	13:23:00	13:28:00	00:05:00	NONE
KK	2014-03-17	2014	march	8	13:29:00	13:33:00	00:04:00	NONE
CB	2014-03-18	2014	march	2	16:35:00	16:38:00	00:03:00	none
CB	2014-03-18	2014	march	4	16:38:00	16:42:00	00:04:00	none
CB	2014-03-18	2014	march	1	16:43:00	16:54:00	00:11:00	American Robin	B	feather pile
CB	2014-03-18	2014	march	19	17:02:00	17:08:00	00:06:00	None
CB	2014-03-18	2014	march	12	17:08:00	17:14:00	00:06:00	none
CB	2014-03-18	2014	march	7	17:15:00	17:19:00	00:04:00	none
CB	2014-03-18	2014	march	3	17:26:00	17:33:00	00:07:00	none
CB	2014-03-18	2014	march	14	17:33:00	17:37:00	00:04:00	none
CB	2014-03-18	2014	march	8	17:37:00	17:39:00	00:02:00	none
CB	2014-03-18	2014	march	30	17:42:00	17:47:00	00:05:00	none
KK	2014-03-19	2014	march	17	14:58:00	15:15:00	00:17:00	none
KK	2014-03-19	2014	march	26	15:19:00	15:30:00	00:11:00	none
KK	2014-03-19	2014	march	20	15:35:00	15:41:00	00:06:00	NONE
KK	2014-03-19	2014	march	21	15:41:00	15:51:00	00:10:00	none		old WTSP
KK	2014-03-19	2014	march	9	15:56:00	16:01:00	00:05:00	NONE
KK	2014-03-19	2014	march	16	16:02:00	16:15:00	00:13:00	none
KK	2014-03-19	2014	march	15	16:15:00	16:24:00	00:09:00	NONE
KK	2014-03-19	2014	march	27	16:29:00	16:34:00	00:05:00	NONE
KK	2014-03-19	2014	march	24	16:35:00	16:43:00	00:08:00	NONE
KK	2014-03-19	2014	march	23	16:46:00	16:51:00	00:05:00	NONE
RMS	2014-03-19	2014	march	11	17:24:00	17:31:00	00:07:00	American Robin	D
CB	2014-03-20	2014	march	17	16:52:00	17:02:00	00:10:00	none
CB	2014-03-20	2014	march	26	17:11:00	17:20:00	00:09:00	none
CB	2014-03-20	2014	march	20	17:22:00	17:29:00	00:07:00	none
CB	2014-03-20	2014	march	21	17:29:00	17:35:00	00:06:00	none
CB	2014-03-20	2014	march	9	17:37:00	17:42:00	00:05:00	none
CB	2014-03-20	2014	march	15	17:43:00	17:50:00	00:07:00	none
CB	2014-03-20	2014	march	16	17:50:00	17:59:00	00:09:00	song sparrow	D
CB	2014-03-20	2014	march	23	18:01:00	18:05:00	00:05:00	none
CB	2014-03-20	2014	march	24	18:05:00	18:10:00	00:05:00	none
CB	2014-03-20	2014	march	27	18:10:00	18:15:00	00:05:00	none
RMS	2014-03-21	2014	march	11	13:03:00	13:08:00	00:05:00	NONE
CB	2014-03-23	2014	march	30	16:15:00	16:19:00	00:04:00	None
CB	2014-03-23	2014	march	8	16:20:00	16:23:00	00:03:00	None
CB	2014-03-23	2014	march	14	16:23:00	16:27:00	00:04:00	none
CB	2014-03-23	2014	march	3	16:27:00	16:34:00	00:07:00	none
CB	2014-03-23	2014	march	12	16:36:00	16:40:00	00:04:00	none
CB	2014-03-23	2014	march	7	16:41:00	16:45:00	00:04:00	none
CB	2014-03-23	2014	march	10	16:45:00	16:49:00	00:04:00	none
CB	2014-03-23	2014	march	1	16:52:00	16:56:00	00:04:00	none
CB	2014-03-23	2014	march	2	16:56:00	16:59:00	00:03:00	none
CB	2014-03-23	2014	march	4	16:59:00	17:04:00	00:05:00	none
KK	2014-03-24	2014	march	2	15:47:00	15:55:00	00:08:00	NONE
KK	2014-03-24	2014	march	4	15:06:00	15:17:00	00:11:00	Dark-eyed Junco	C
KK	2014-03-24	2014	march	1	15:20:00	15:40:00	00:20:00	Mourning dove	A
KK	2014-03-24	2014	march	x	x	x	x	unknown	B
KK	2014-03-24	2014	march	10	15:47:00	15:55:00	00:08:00	NONE
KK	2014-03-24	2014	march	7	15:56:00	16:04:00	00:08:00	NONE
KK	2014-03-24	2014	march	12	16:05:00	16:12:00	00:07:00	NONE
KK	2014-03-24	2014	march	3	16:15:00	16:20:00	00:05:00	NONE
KK	2014-03-24	2014	march	14	16:22:00	16:29:00	00:07:00	none
KK	2014-03-24	2014	march	8	16:30:00	16:35:00	00:05:00	NONE
RMS	2014-03-24	2014	march	11	14:00:00	14:05:00	00:05:00	NONE
JM	2014-03-26	2014	march	3	14:51:00	14:58:00	00:07:00	NONE
JM	2014-03-26	2014	march	14	15:04:00	15:08:00	00:04:00	NONE
JM	2014-03-26	2014	march	8	15:08:00	15:13:00	00:05:00	NONE
JM	2014-03-26	2014	march	10	15:18:00	15:24:00	00:06:00	NONE
JM	2014-03-26	2014	march	12	15:27:00	15:32:00	00:05:00	NONE
JM	2014-03-26	2014	march	7	15:34:00	15:40:00	00:06:00	NONE
JM	2014-03-26	2014	march	4	15:45:00	15:51:00	00:06:00	NONE
JM	2014-03-26	2014	march	2	15:52:00	15:57:00	00:05:00	NONE
JM	2014-03-26	2014	march	1	15:58:00	16:03:00	00:05:00	NONE
JM	2014-03-26	2014	march	30	16:10:00	16:16:00	00:06:00	NONE
JM	2014-03-26	2014	march	31	16:21:00	16:28:00	00:07:00	NONE
CB	2014-03-27	2014	march	17	16:37:00	16:45:00	00:08:00	NONE
CB	2014-03-27	2014	march	26	16:46:00	16:53:00	00:07:00	NONE
CB	2014-03-27	2014	march	20	16:55:00	16:59:00	00:04:00	NONE
CB	2014-03-27	2014	march	21	16:59:00	17:04:00	00:05:00	NONE
CB	2014-03-27	2014	march	9	17:07:00	17:11:00	00:04:00	NONE
CB	2014-03-27	2014	march	15	17:11:00	17:17:00	00:06:00	NONE
CB	2014-03-27	2014	march	16	17:17:00	17:23:00	00:06:00	NONE
CB	2014-03-27	2014	march	23	17:29:00	17:32:00	00:03:00	NONE
CB	2014-03-27	2014	march	24	17:33:00	17:38:00	00:05:00	NONE
CB	2014-03-27	2014	march	27	17:39:00	17:42:00	00:03:00	NONE
CB	2014-03-30	2014	march	2	16:27:00	16:30:00	00:03:00	NONE
CB	2014-03-30	2014	march	4	16:30:00	16:34:00	00:04:00	NONE
CB	2014-03-30	2014	march	1	16:35:00	16:38:00	00:03:00	NONE
CB	2014-03-30	2014	march	7	16:41:00	16:50:00	00:09:00	none
CB	2014-03-30	2014	march	10	16:51:00	16:56:00	00:05:00	NONE
CB	2014-03-30	2014	march	12	16:57:00	17:07:00	00:10:00	none
CB	2014-03-30	2014	march	3	17:12:00	17:17:00	00:05:00	NONE
CB	2014-03-30	2014	march	14	17:17:00	17:21:00	00:04:00	NONE
CB	2014-03-30	2014	march	8	17:21:00	17:24:00	00:03:00	NONE
CB	2014-03-30	2014	march	30	17:26:00	17:30:00	00:04:00	NONE
JM	2014-03-31	2014	march	27	15:11:00	15:16:00	00:05:00	NONE
JM	2014-03-31	2014	march	24	15:17:00	15:26:00	00:09:00	NONE
JM	2014-03-31	2014	march	23	15:29:00	15:35:00	00:06:00	NONE
JM	2014-03-31	2014	march	21	15:43:00	15:51:00	00:08:00	NONE
JM	2014-03-31	2014	march	20	15:51:00	15:58:00	00:07:00	NONE
JM	2014-03-31	2014	march	15	16:02:00	16:10:00	00:08:00	NONE
JM	2014-03-31	2014	march	16	16:10:00	16:19:00	00:09:00	NONE
JM	2014-03-31	2014	march	9	16:21:00	16:28:00	00:07:00	NONE
JM	2014-03-31	2014	march	17	16:33:00	16:41:00	00:08:00	NONE
JM	2014-03-31	2014	march	26	16:45:00	16:56:00	00:11:00	NONE
KK	2014-03-31	2014	march	2	14:51:00	15:09:00	00:18:00	American Robin	D
KK	2014-03-31	2014	march	4	15:09:00	15:15:00	00:06:00	NONE
KK	2014-03-31	2014	march	1	15:17:00	15:26:00	00:09:00	none
KK	2014-03-31	2014	march	10	15:29:00	15:35:00	00:06:00	NONE
KK	2014-03-31	2014	march	7	15:36:00	15:43:00	00:07:00	NONE
KK	2014-03-31	2014	march	12	15:45:00	15:50:00	00:05:00	NONE
KK	2014-03-31	2014	march	3	15:53:00	15:58:00	00:05:00	NONE
KK	2014-03-31	2014	march	14	15:59:00	16:04:00	00:05:00	NONE
KK	2014-03-31	2014	march	8	16:04:00	16:08:00	00:04:00	NONE
RMS	2014-03-31	2014	march	11	15:52:00	16:00:00	00:08:00	NONE
CB	2014-04-01	2014	april	20	16:32:00	16:37:00	00:05:00	NONE
CB	2014-04-01	2014	april	21	16:37:00	16:42:00	00:05:00	NONE
CB	2014-04-01	2014	april	26	16:45:00	16:58:00	00:13:00	NONE
CB	2014-04-01	2014	april	17	17:01:00	17:05:00	00:04:00	NONE
CB	2014-04-01	2014	april	23	17:10:00	17:13:00	00:03:00	NONE
CB	2014-04-01	2014	april	24	17:14:00	17:21:00	00:07:00	NONE
CB	2014-04-01	2014	april	27	17:22:00	17:25:00	00:03:00	NONE
CB	2014-04-01	2014	april	9	17:27:00	17:32:00	00:05:00	NONE
CB	2014-04-01	2014	april	15	17:33:00	17:40:00	00:07:00	NONE
CB	2014-04-01	2014	april	16	17:40:00	17:46:00	00:06:00	NONE
RMS	2014-04-01	2014	april	11	15:53:00	16:01:00	00:08:00	NONE
KK	2014-04-02	2014	april	17	15:42:00	15:48:00	00:06:00	NONE
KK	2014-04-02	2014	april	26	15:51:00	16:06:00	00:15:00	none
KK	2014-04-02	2014	april	20	16:08:00	16:15:00	00:07:00	NONE
KK	2014-04-02	2014	april	21	16:15:00	16:31:00	00:16:00	european starling	A
KK	2014-04-02	2014	april	9	16:35:00	16:40:00	00:05:00	NONE
KK	2014-04-02	2014	april	16	16:41:00	16:55:00	00:14:00	none
KK	2014-04-02	2014	april	15	16:55:00	17:03:00	00:08:00	NONE
KK	2014-04-02	2014	april	27	17:07:00	17:11:00	00:04:00	NONE
KK	2014-04-02	2014	april	24	17:13:00	17:19:00	00:06:00	NONE
KK	2014-04-02	2014	april	23	17:21:00	17:25:00	00:04:00	NONE
CG	2014-04-03	2014	april	14	14:10:00	14:20:00	00:10:00	NONE
CG	2014-04-03	2014	april	3	14:21:00	14:28:00	00:07:00	NONE
CG	2014-04-03	2014	april	8	14:28:00	14:32:00	00:04:00	NONE
CG	2014-04-03	2014	april	10	14:32:00	14:45:00	00:13:00	NONE
CG	2014-04-03	2014	april	12	14:45:00	14:59:00	00:14:00	none
CG	2014-04-03	2014	april	7	15:00:00	15:15:00	00:15:00	American Robin	C
CG	2014-04-03	2014	april	4	15:18:00	15:24:00	00:06:00	NONE
CG	2014-04-03	2014	april	2	15:24:00	15:32:00	00:08:00	none
CG	2014-04-03	2014	april	1	15:33:00	15:40:00	00:07:00	none
CG	2014-04-03	2014	april	30	15:44:00	15:52:00	00:08:00	NONE
RMS	2014-04-03	2014	april	11	15:52:00	15:59:00	00:07:00	NONE
CA	2014-04-04	2014	april	2	14:35:00	14:42:00	00:07:00	NONE
CA	2014-04-04	2014	april	1	14:43:00	14:49:00	00:06:00	NONE
CA	2014-04-04	2014	april	4	14:52:00	14:59:00	00:07:00	NONE
CA	2014-04-04	2014	april	10	15:03:00	15:13:00	00:10:00	NONE
CA	2014-04-04	2014	april	7	15:16:00	15:24:00	00:08:00	none		old AMRO, C
CG	2014-04-04	2014	april	27	16:46:00	16:53:00	00:07:00	NONE
CG	2014-04-04	2014	april	24	16:54:00	17:01:00	00:07:00	NONE
CG	2014-04-04	2014	april	23	17:01:00	17:12:00	00:11:00	Dark-eyed Junco	B
CG	2014-04-04	2014	april	9	17:17:00	17:21:00	00:04:00	NONE
CG	2014-04-04	2014	april	15	17:21:00	17:35:00	00:14:00	NONE
CG	2014-04-04	2014	april	20	17:37:00	17:43:00	00:06:00	NONE
CG	2014-04-04	2014	april	21	17:43:00	17:49:00	00:06:00	NONE
CG	2014-04-04	2014	april	17	17:51:00	17:58:00	00:07:00	NONE
CG	2014-04-04	2014	april	26	17:59:00	18:07:00	00:08:00	NONE
CB	2014-04-06	2014	april	30	18:03:00	18:08:00	00:05:00	NONE
CB	2014-04-06	2014	april	8	18:10:00	18:13:00	00:03:00	NONE
CB	2014-04-06	2014	april	14	18:13:00	18:17:00	00:04:00	NONE
CB	2014-04-06	2014	april	3	18:17:00	18:23:00	00:06:00	NONE
CB	2014-04-06	2014	april	12	18:25:00	18:31:00	00:06:00	NONE
CB	2014-04-06	2014	april	7	18:31:00	18:41:00	00:10:00	none		old robin, C
CB	2014-04-06	2014	april	10	18:42:00	18:45:00	00:03:00	NONE
CB	2014-04-06	2014	april	1	18:47:00	18:51:00	00:04:00	NONE
CB	2014-04-06	2014	april	2	18:52:00	18:54:00	00:02:00	NONE
CB	2014-04-06	2014	april	4	18:54:00	19:00:00	00:06:00	NONE
LS	2014-04-06	2014	april	27	14:20:00	14:32:00	00:12:00	NONE
LS	2014-04-06	2014	april	24	14:33:00	14:41:00	00:08:00	NONE
LS	2014-04-06	2014	april	23	14:42:00	14:47:00	00:05:00	NONE
LS	2014-04-06	2014	april	17	14:49:00	14:54:00	00:05:00	NONE
LS	2014-04-06	2014	april	26	14:56:00	15:02:00	00:06:00	NONE
LS	2014-04-06	2014	april	20	15:04:00	15:11:00	00:07:00	none		Window Feather, B
LS	2014-04-06	2014	april	21	15:11:00	15:16:00	00:05:00	NONE
LS	2014-04-06	2014	april	16	15:18:00	15:24:00	00:06:00	NONE
LS	2014-04-06	2014	april	15	15:24:00	15:33:00	00:09:00	unknown feather pile	F
LS	2014-04-06	2014	april	x	x	x	x	none		Window Feather, D
LS	2014-04-06	2014	april	9	15:33:00	15:42:00	00:09:00	savannah sparrow	B	whole bird
JM	2014-04-07	2014	april	27	15:17:00	15:22:00	00:05:00	NONE
JM	2014-04-07	2014	april	24	15:22:00	15:31:00	00:09:00	NONE
JM	2014-04-07	2014	april	23	15:34:00	15:45:00	00:11:00	none		old junco, B
JM	2014-04-07	2014	april	15	15:53:00	16:08:00	00:15:00	none
JM	2014-04-07	2014	april	16	16:08:00	16:20:00	00:12:00	NONE
JM	2014-04-07	2014	april	9	16:21:00	16:28:00	00:07:00	NONE
JM	2014-04-07	2014	april	20	16:33:00	16:40:00	00:07:00	NONE
JM	2014-04-07	2014	april	21	16:40:00	16:46:00	00:06:00	NONE
JM	2014-04-07	2014	april	17	16:49:00	16:57:00	00:08:00	NONE
JM	2014-04-07	2014	april	26	17:00:00	17:06:00	00:06:00	NONE
RMS	2014-04-07	2014	april	11	15:56:00	16:04:00	00:08:00	NONE
CB	2014-04-08	2014	april	17	16:02:00	16:08:00	00:06:00	NONE
CB	2014-04-08	2014	april	26	16:12:00	16:20:00	00:08:00	NONE
CB	2014-04-08	2014	april	20	16:23:00	16:32:00	00:09:00	none		feathers stuck to window, C
CB	2014-04-08	2014	april	21	16:32:00	16:38:00	00:06:00	NONE
CB	2014-04-08	2014	april	15	16:43:00	16:53:00	00:10:00	unknown feather pile	E
CB	2014-04-08	2014	april	16	16:54:00	17:02:00	00:08:00	NONE
CB	2014-04-08	2014	april	9	17:03:00	17:14:00	00:11:00	none
CB	2014-04-08	2014	april	27	17:18:00	17:23:00	00:05:00	NONE
CB	2014-04-08	2014	april	24	17:23:00	17:33:00	00:10:00	NONE
CB	2014-04-08	2014	april	23	17:36:00	17:45:00	00:09:00	none
JM	2014-04-09	2014	april	3	14:55:00	15:01:00	00:06:00	NONE
JM	2014-04-09	2014	april	8	15:02:00	15:06:00	00:04:00	NONE
JM	2014-04-09	2014	april	14	15:07:00	15:11:00	00:04:00	NONE
JM	2014-04-09	2014	april	12	15:17:00	15:22:00	00:05:00	NONE
JM	2014-04-09	2014	april	7	15:22:00	15:35:00	00:13:00	none
JM	2014-04-09	2014	april	10	15:35:00	15:43:00	00:08:00	NONE
JM	2014-04-09	2014	april	4	15:47:00	15:53:00	00:06:00	NONE
JM	2014-04-09	2014	april	2	15:54:00	15:58:00	00:04:00	NONE
JM	2014-04-09	2014	april	1	15:59:00	16:04:00	00:05:00	NONE
JM	2014-04-09	2014	april	30	16:08:00	16:14:00	00:06:00	NONE
JM	2014-04-09	2014	april	31	16:25:00	16:32:00	00:07:00	NONE
CG	2014-04-10	2014	april	26	14:32:00	14:40:00	00:08:00	NONE
CG	2014-04-10	2014	april	20	14:43:00	14:48:00	00:05:00	NONE
CG	2014-04-10	2014	april	21	14:48:00	14:52:00	00:04:00	NONE
CG	2014-04-10	2014	april	17	15:08:00	15:13:00	00:05:00	NONE
CG	2014-04-10	2014	april	15	15:16:00	15:24:00	00:08:00	none
CG	2014-04-10	2014	april	16	15:24:00	15:32:00	00:08:00	NONE
CG	2014-04-10	2014	april	9	15:33:00	15:39:00	00:06:00	NONE
CG	2014-04-10	2014	april	27	15:41:00	15:47:00	00:06:00	NONE
CG	2014-04-10	2014	april	24	15:48:00	15:55:00	00:07:00	NONE
CG	2014-04-10	2014	april	23	15:57:00	16:04:00	00:07:00	NONE
CB	2014-04-10	2014	april	1	18:15:00	18:18:00	00:03:00	NONE
CB	2014-04-10	2014	april	2	18:19:00	18:22:00	00:03:00	NONE
CB	2014-04-10	2014	april	4	18:22:00	18:26:00	00:04:00	NONE
CB	2014-04-10	2014	april	10	18:28:00	18:33:00	00:05:00	NONE
CB	2014-04-10	2014	april	7	18:33:00	18:38:00	00:05:00	NONE
CB	2014-04-10	2014	april	12	18:39:00	18:46:00	00:07:00	none
CB	2014-04-10	2014	april	3	18:48:00	18:53:00	00:05:00	NONE
CB	2014-04-10	2014	april	14	18:53:00	18:56:00	00:03:00	NONE
CB	2014-04-10	2014	april	8	18:56:00	18:58:00	00:02:00	NONE
CB	2014-04-10	2014	april	30	18:59:00	19:03:00	00:04:00	NONE
CG	2014-04-11	2014	april	4	16:43:00	16:49:00	00:06:00	NONE
CG	2014-04-11	2014	april	2	16:49:00	16:53:00	00:04:00	NONE
CG	2014-04-11	2014	april	1	16:55:00	17:05:00	00:10:00	none
CG	2014-04-11	2014	april	7	17:07:00	17:12:00	00:05:00	NONE
CG	2014-04-11	2014	april	10	17:12:00	17:18:00	00:06:00	NONE
CG	2014-04-11	2014	april	12	17:18:00	17:25:00	00:07:00	NONE
CG	2014-04-11	2014	april	3	17:28:00	17:35:00	00:07:00	NONE
CG	2014-04-11	2014	april	14	17:35:00	17:41:00	00:06:00	NONE
CG	2014-04-11	2014	april	8	17:41:00	17:46:00	00:05:00	NONE
CG	2014-04-11	2014	april	30	17:50:00	17:56:00	00:06:00	NONE
JM	2014-04-14	2014	april	27	14:50:00	14:57:00	00:07:00	NONE
JM	2014-04-14	2014	april	24	15:05:00	15:08:00	00:03:00	NONE
JM	2014-04-14	2014	april	23	15:08:00	15:15:00	00:07:00	NONE
JM	2014-04-14	2014	april	21	15:16:00	15:26:00	00:10:00	NONE
JM	2014-04-14	2014	april	20	15:26:00	15:31:00	00:05:00	NONE
JM	2014-04-14	2014	april	15	15:40:00	15:45:00	00:05:00	NONE
JM	2014-04-14	2014	april	16	15:47:00	15:55:00	00:08:00	NONE
JM	2014-04-14	2014	april	9	16:01:00	16:06:00	00:05:00	NONE
JM	2014-04-14	2014	april	17	16:09:00	16:15:00	00:06:00	NONE
JM	2014-04-14	2014	april	26	16:18:00	16:24:00	00:06:00	NONE
JM	2014-04-14	2014	april	31	16:30:00	16:35:00	00:05:00	NONE
KK	2014-04-14	2014	april	2	12:56:00	13:01:00	00:05:00	NONE
KK	2014-04-14	2014	april	4	13:02:00	13:19:00	00:17:00	none
KK	2014-04-14	2014	april	x	x	x	x	American Robin	A
KK	2014-04-14	2014	april	1	13:21:00	13:31:00	00:10:00	brown thrasher	C
KK	2014-04-14	2014	april	10	13:34:00	13:51:00	00:17:00	none
KK	2014-04-14	2014	april	7	13:52:00	13:57:00	00:05:00	NONE
KK	2014-04-14	2014	april	12	13:58:00	14:05:00	00:07:00	NONE
KK	2014-04-14	2014	april	3	14:07:00	14:12:00	00:05:00	NONE
KK	2014-04-14	2014	april	14	14:13:00	14:17:00	00:04:00	NONE
KK	2014-04-14	2014	april	8	14:17:00	14:21:00	00:04:00	NONE
CB	2014-04-15	2014	april	2	16:33:00	16:36:00	00:03:00	NONE
CB	2014-04-15	2014	april	4	16:36:00	16:40:00	00:04:00	NONE
CB	2014-04-15	2014	april	1	16:41:00	16:46:00	00:05:00	none
CB	2014-04-15	2014	april	10	16:50:00	16:56:00	00:06:00	NONE
CB	2014-04-15	2014	april	12	16:56:00	17:05:00	00:09:00	American Robin	F	feather pile
CB	2014-04-15	2014	april	7	17:06:00	17:11:00	00:05:00	NONE
CB	2014-04-15	2014	april	3	17:18:00	17:24:00	00:06:00	NONE
CB	2014-04-15	2014	april	14	17:24:00	17:29:00	00:05:00	NONE
CB	2014-04-15	2014	april	8	17:29:00	17:32:00	00:03:00	NONE
CB	2014-04-15	2014	april	30	17:34:00	17:39:00	00:05:00	NONE
JM	2014-04-16	2014	april	27	14:50:00	15:00:00	00:10:00	NONE
JM	2014-04-16	2014	april	24	15:03:00	15:07:00	00:04:00	NONE
JM	2014-04-16	2014	april	23	15:09:00	15:14:00	00:05:00	NONE
JM	2014-04-16	2014	april	15	15:17:00	15:22:00	00:05:00	NONE
JM	2014-04-16	2014	april	16	15:22:00	15:35:00	00:13:00	NONE
JM	2014-04-16	2014	april	9	15:35:00	15:43:00	00:08:00	NONE
JM	2014-04-16	2014	april	20	15:47:00	15:53:00	00:06:00	NONE
JM	2014-04-16	2014	april	21	15:54:00	15:58:00	00:04:00	NONE
JM	2014-04-16	2014	april	17	15:59:00	16:04:00	00:05:00	NONE
JM	2014-04-16	2014	april	26	16:08:00	16:14:00	00:06:00	NONE
KK	2014-04-16	2014	april	17	13:20:00	13:25:00	00:05:00	NONE
KK	2014-04-16	2014	april	26	13:29:00	13:36:00	00:07:00	NONE
KK	2014-04-16	2014	april	20	13:38:00	13:44:00	00:06:00	NONE
KK	2014-04-16	2014	april	21	13:44:00	13:51:00	00:07:00	NONE
KK	2014-04-16	2014	april	9	13:56:00	14:01:00	00:05:00	NONE
KK	2014-04-16	2014	april	16	14:02:00	14:20:00	00:18:00	Mourning dove	A
KK	2014-04-16	2014	april	15	14:20:00	14:30:00	00:10:00	NONE
KK	2014-04-16	2014	april	27	14:35:00	14:40:00	00:05:00	NONE
KK	2014-04-16	2014	april	24	14:41:00	14:47:00	00:06:00	NONE
KK	2014-04-16	2014	april	23	14:51:00	14:56:00	00:05:00	NONE
CB	2014-04-17	2014	april	17	17:16:00	17:24:00	00:08:00	NONE
CB	2014-04-17	2014	april	26	17:26:00	17:33:00	00:07:00	NONE
CB	2014-04-17	2014	april	20	17:35:00	17:40:00	00:05:00	NONE
CB	2014-04-17	2014	april	21	17:40:00	17:49:00	00:09:00	unknown feather pile	E
CB	2014-04-17	2014	april	9	17:51:00	17:57:00	00:06:00	dark-eyed junco	D
CB	2014-04-17	2014	april	15	17:58:00	18:04:00	00:06:00	none
CB	2014-04-17	2014	april	16	18:04:00	18:10:00	00:06:00	NONE
CB	2014-04-17	2014	april	24	18:12:00	18:17:00	00:05:00	NONE
CB	2014-04-17	2014	april	27	18:17:00	18:19:00	00:02:00	NONE
CB	2014-04-17	2014	april	23	18:20:00	18:23:00	00:03:00	NONE
CG	2014-04-17	2014	april	4	14:03:00	14:14:00	00:11:00	none
CG	2014-04-17	2014	april	2	14:14:00	14:20:00	00:06:00	NONE
CG	2014-04-17	2014	april	1	14:20:00	14:27:00	00:07:00	none
CG	2014-04-17	2014	april	7	14:35:00	14:42:00	00:07:00	NONE
CG	2014-04-17	2014	april	10	14:42:00	14:49:00	00:07:00	NONE
CG	2014-04-17	2014	april	12	14:49:00	14:55:00	00:06:00	NONE
CG	2014-04-17	2014	april	3	15:01:00	15:09:00	00:08:00	NONE
CG	2014-04-17	2014	april	14	15:09:00	15:14:00	00:05:00	NONE
CG	2014-04-17	2014	april	8	15:14:00	15:18:00	00:04:00	NONE
CG	2014-04-17	2014	april	30	15:23:00	15:32:00	00:09:00	NONE
CA	2014-04-18	2014	april	2	14:38:00	14:52:00	00:14:00	NONE
CA	2014-04-18	2014	april	4	14:54:00	15:08:00	00:14:00	American Robin	B	feather pile
CA	2014-04-18	2014	april	1	15:09:00	15:13:00	00:04:00	NONE
CA	2014-04-18	2014	april	10	15:16:00	15:20:00	00:04:00	NONE
CA	2014-04-18	2014	april	7	15:22:00	15:28:00	00:06:00	NONE
CA	2014-04-18	2014	april	12	15:28:00	15:40:00	00:12:00	none
CA	2014-04-18	2014	april	3	15:58:00	16:04:00	00:06:00	NONE
CA	2014-04-18	2014	april	14	16:06:00	16:10:00	00:04:00	NONE
CA	2014-04-18	2014	april	8	16:10:00	16:15:00	00:05:00	NONE
CG	2014-04-18	2014	april	26	14:28:00	14:38:00	00:10:00	NONE
CG	2014-04-18	2014	april	21	14:41:00	14:50:00	00:09:00	cedar waxwing	E
CG	2014-04-18	2014	april	21	14:50:00	14:59:00	00:09:00	NONE
CG	2014-04-18	2014	april	17	15:03:00	15:11:00	00:08:00	NONE
CG	2014-04-18	2014	april	15	15:14:00	15:24:00	00:10:00	none
CG	2014-04-18	2014	april	16	15:24:00	15:33:00	00:09:00	NONE
CG	2014-04-18	2014	april	9	15:33:00	15:42:00	00:09:00	none
CG	2014-04-18	2014	april	23	15:47:00	15:52:00	00:05:00	NONE
CG	2014-04-18	2014	april	24	15:53:00	16:00:00	00:07:00	NONE
CG	2014-04-18	2014	april	27	16:02:00	16:08:00	00:06:00	NONE
KK	2014-04-21	2014	april	2	14:17:00	14:23:00	00:06:00	NONE
KK	2014-04-21	2014	april	4	14:23:00	14:33:00	00:10:00	none
KK	2014-04-21	2014	april	1	14:35:00	14:43:00	00:08:00	none
KK	2014-04-21	2014	april	10	14:46:00	14:52:00	00:06:00	NONE
KK	2014-04-21	2014	april	7	14:53:00	14:59:00	00:06:00	NONE
KK	2014-04-21	2014	april	12	15:00:00	15:12:00	00:12:00	none
KK	2014-04-21	2014	april	3	15:14:00	15:19:00	00:05:00	NONE
KK	2014-04-21	2014	april	14	15:20:00	15:25:00	00:05:00	NONE
KK	2014-04-21	2014	april	8	15:25:00	15:29:00	00:04:00	NONE
RMS	2014-04-21	2014	april	11	15:46:00	15:56:00	00:10:00	unknown	B
CB	2014-04-22	2014	april	17	16:40:00	16:46:00	00:06:00	NONE
CB	2014-04-22	2014	april	26	16:48:00	16:55:00	00:07:00	NONE
CB	2014-04-22	2014	april	20	16:58:00	17:12:00	00:14:00	American Robin	B
CB	2014-04-22	2014	april	21	17:12:00	17:22:00	00:10:00	none		old cedar waxing, E
CB	2014-04-22	2014	april	15	17:25:00	17:34:00	00:09:00	eastern bluebird	F
CB	2014-04-22	2014	april	16	17:34:00	17:43:00	00:09:00	NONE
CB	2014-04-22	2014	april	9	17:44:00	17:47:00	00:03:00	NONE
CB	2014-04-22	2014	april	27	17:51:00	17:53:00	00:02:00	NONE
CB	2014-04-22	2014	april	24	17:56:00	18:02:00	00:06:00	NONE
CB	2014-04-22	2014	april	23	18:03:00	18:06:00	00:03:00	NONE
RMS	2014-04-22	2014	april	11	15:58:00	16:07:00	00:09:00	NONE
JM	2014-04-23	2014	april	8	15:37:00	15:50:00	00:13:00	NONE
JM	2014-04-23	2014	april	14	15:51:00	15:56:00	00:05:00	NONE
JM	2014-04-23	2014	april	3	15:56:00	16:04:00	00:08:00	NONE
JM	2014-04-23	2014	april	10	16:09:00	16:15:00	00:06:00	NONE
JM	2014-04-23	2014	april	7	16:16:00	16:21:00	00:05:00	NONE
JM	2014-04-23	2014	april	12	16:22:00	16:32:00	00:10:00	none
JM	2014-04-23	2014	april	4	16:36:00	16:41:00	00:05:00	NONE
JM	2014-04-23	2014	april	2	16:41:00	16:46:00	00:05:00	NONE
JM	2014-04-23	2014	april	1	16:46:00	16:50:00	00:04:00	NONE
JM	2014-04-23	2014	april	30	16:55:00	17:00:00	00:05:00	NONE
JM	2014-04-23	2014	april	31	17:10:00	17:15:00	00:05:00	NONE
RMS	2014-04-23	2014	april	11	15:57:00	16:07:00	00:10:00	unknown	D
CG	2014-04-24	2014	april	23	15:40:00	15:46:00	00:06:00	NONE
CG	2014-04-24	2014	april	24	15:46:00	15:53:00	00:07:00	NONE
CG	2014-04-24	2014	april	27	15:54:00	15:59:00	00:05:00	NONE
CG	2014-04-24	2014	april	15	16:02:00	16:08:00	00:06:00	NONE
CG	2014-04-24	2014	april	16	16:08:00	16:13:00	00:05:00	NONE
CG	2014-04-24	2014	april	9	16:13:00	16:18:00	00:05:00	NONE
CG	2014-04-24	2014	april	20	16:20:00	16:27:00	00:07:00	NONE
CG	2014-04-24	2014	april	21	16:27:00	16:33:00	00:06:00	NONE
CG	2014-04-24	2014	april	17	16:35:00	16:41:00	00:06:00	NONE
CG	2014-04-24	2014	april	26	16:44:00	16:51:00	00:07:00	NONE
CG	2014-04-25	2014	april	1	14:57:00	15:04:00	00:07:00	none
CG	2014-04-25	2014	april	4	15:05:00	15:11:00	00:06:00	NONE
CG	2014-04-25	2014	april	2	15:11:00	15:17:00	00:06:00	NONE
CG	2014-04-25	2014	april	10	15:19:00	15:27:00	00:08:00	NONE
CG	2014-04-25	2014	april	7	15:27:00	15:35:00	00:08:00	NONE
CG	2014-04-25	2014	april	12	15:35:00	15:42:00	00:07:00	NONE
CG	2014-04-25	2014	april	3	15:44:00	15:51:00	00:07:00	NONE
CG	2014-04-25	2014	april	14	15:51:00	15:56:00	00:05:00	NONE
CG	2014-04-25	2014	april	8	15:56:00	16:00:00	00:04:00	NONE
CG	2014-04-25	2014	april	30	16:02:00	16:09:00	00:07:00	NONE
RMS	2014-04-25	2014	april	11	15:55:00	16:08:00	00:13:00	Ruby-throated hummingbird	B
RMS	2014-04-26	2014	april	x	x	x	x	Ruby-throated hummingbird	C
JM	2014-04-28	2014	april	27	15:00:00	15:05:00	00:05:00	NONE
JM	2014-04-28	2014	april	24	15:14:00	15:14:00	00:00:00	NONE
JM	2014-04-28	2014	april	23	15:18:00	15:22:00	00:04:00	NONE
JM	2014-04-28	2014	april	15	15:29:00	15:34:00	00:05:00	NONE
JM	2014-04-28	2014	april	16	15:34:00	15:44:00	00:10:00	none
JM	2014-04-28	2014	april	9	15:45:00	15:51:00	00:06:00	NONE
JM	2014-04-28	2014	april	20	15:55:00	16:01:00	00:06:00	NONE
JM	2014-04-28	2014	april	21	16:01:00	16:07:00	00:06:00	NONE
JM	2014-04-28	2014	april	17	16:15:00	16:23:00	00:08:00	NONE
JM	2014-04-28	2014	april	26	16:26:00	16:35:00	00:09:00	NONE
KK	2014-04-28	2014	april	2	10:44:00	10:50:00	00:06:00	none
KK	2014-04-28	2014	april	4	10:51:00	10:55:00	00:04:00	NONE
KK	2014-04-28	2014	april	1	10:57:00	11:05:00	00:08:00	Mourning dove	A
KK	2014-04-28	2014	april	10	11:07:00	11:12:00	00:05:00	NONE
KK	2014-04-28	2014	april	7	11:13:00	11:17:00	00:04:00	NONE
KK	2014-04-28	2014	april	12	11:19:00	11:28:00	00:09:00	American goldfinch	C
KK	2014-04-28	2014	april	3	11:30:00	11:34:00	00:04:00	NONE
KK	2014-04-28	2014	april	14	11:35:00	11:42:00	00:07:00	Ruby-throated hummingbird	B
KK	2014-04-28	2014	april	8	11:42:00	11:45:00	00:03:00	NONE
CB	2014-04-29	2014	april	2	17:52:00	18:00:00	00:08:00	yellow-rumped warbler	B	feather pile
CB	2014-04-29	2014	april	4	18:00:00	18:12:00	00:12:00	unknown	C	2 feather piles on pavement
CB	2014-04-29	2014	april	1	18:13:00	18:16:00	00:03:00	NONE
CB	2014-04-29	2014	april	7	18:20:00	18:25:00	00:05:00	NONE
CB	2014-04-29	2014	april	10	18:25:00	18:29:00	00:04:00	NONE
CB	2014-04-29	2014	april	12	18:30:00	18:35:00	00:05:00	NONE
CB	2014-04-29	2014	april	3	18:37:00	18:44:00	00:07:00	NONE
CB	2014-04-29	2014	april	14	18:44:00	18:48:00	00:04:00	NONE
CB	2014-04-29	2014	april	8	18:48:00	18:53:00	00:05:00	NONE
CB	2014-04-29	2014	april	30	18:54:00	18:59:00	00:05:00	NONE
JM	2014-04-30	2014	april	3	15:55:00	16:01:00	00:06:00	NONE
JM	2014-04-30	2014	april	14	16:07:00	16:11:00	00:04:00	NONE
JM	2014-04-30	2014	april	8	16:11:00	16:15:00	00:04:00	NONE
JM	2014-04-30	2014	april	10	16:18:00	16:24:00	00:06:00	NONE
JM	2014-04-30	2014	april	12	16:27:00	16:32:00	00:05:00	NONE
JM	2014-04-30	2014	april	7	16:34:00	16:40:00	00:06:00	NONE
JM	2014-04-30	2014	april	4	16:46:00	16:51:00	00:05:00	NONE
JM	2014-04-30	2014	april	2	16:53:00	16:58:00	00:05:00	NONE
JM	2014-04-30	2014	april	1	16:59:00	17:04:00	00:05:00	NONE
JM	2014-04-30	2014	april	30	17:11:00	17:17:00	00:06:00	NONE
JM	2014-04-30	2014	april	31	17:25:00	17:32:00	00:07:00	NONE
RMS	2014-04-30	2014	april	11	11:59:00	12:08:00	00:09:00	NONE
CB	2014-05-01	2014	may	17	14:56:00	15:08:00	00:12:00	Gray Catbird	B	In bush
CB	2014-05-01	2014	may	26	15:12:00	15:17:00	00:05:00	NONE
CB	2014-05-01	2014	may	20	15:20:00	15:27:00	00:07:00	NONE
CB	2014-05-01	2014	may	21	15:27:00	15:38:00	00:11:00	NONE
CB	2014-05-01	2014	may	9	15:41:00	15:47:00	00:06:00	NONE
CB	2014-05-01	2014	may	15	15:48:00	15:56:00	00:08:00	NONE
CB	2014-05-01	2014	may	16	15:56:00	16:04:00	00:08:00	Gray Catbird	D
CB	2014-05-01	2014	may	27	16:17:00	16:20:00	00:03:00	NONE
CB	2014-05-01	2014	may	24	16:21:00	16:26:00	00:05:00	NONE
CB	2014-05-01	2014	may	23	16:28:00	16:31:00	00:03:00	NONE
RMS	2014-05-01	2014	may	11	15:42:00	15:55:00	00:13:00	Gray catbird	B
JM	2014-05-05	2014	may	27	14:20:00	14:30:00	00:10:00	White Throated Sparrow	A
JM	2014-05-05	2014	may	24	14:36:00	14:52:00	00:16:00	Gray Catbird	A
JM	2014-05-05	2014	may	23	14:54:00	15:00:00	00:06:00	NONE
JM	2014-05-05	2014	may	15	15:06:00	15:15:00	00:09:00	NONE
JM	2014-05-05	2014	may	16	15:15:00	15:22:00	00:07:00	NONE
JM	2014-05-05	2014	may	9	15:22:00	15:30:00	00:08:00	NONE
JM	2014-05-05	2014	may	20	15:37:00	15:52:00	00:15:00	Indigo Bunting	A
JM	2014-05-05	2014	may	21	15:52:00	16:04:00	00:12:00	Red-winged blackbird	E
JM	2014-05-05	2014	may	17	16:12:00	16:20:00	00:08:00	NONE
JM	2014-05-05	2014	may	26	16:27:00	16:37:00	00:10:00	NONE
CB	2014-05-06	2014	may	17	16:05:00	16:10:00	00:05:00	NONE
CB	2014-05-06	2014	may	26	16:12:00	16:18:00	00:06:00	NONE
CB	2014-05-06	2014	may	20	16:20:00	16:28:00	00:08:00	none		same INBU
CB	2014-05-06	2014	may	21	16:28:00	16:33:00	00:05:00	NONE
CB	2014-05-06	2014	may	9	16:35:00	16:40:00	00:05:00	NONE
CB	2014-05-06	2014	may	15	16:40:00	16:47:00	00:07:00	NONE
CB	2014-05-06	2014	may	16	16:47:00	16:54:00	00:07:00	NONE
CB	2014-05-06	2014	may	23	20:06:00	20:11:00	00:05:00	NONE
CB	2014-05-06	2014	may	24	20:12:00	20:24:00	00:12:00	none		same catbird
CB	2014-05-06	2014	may	27	20:25:00	20:29:00	00:04:00	none		same WTSP, A
KK	2014-05-07	2014	may	17	14:00:00	14:07:00	00:07:00	NONE
KK	2014-05-07	2014	may	26	14:10:00	14:18:00	00:08:00	NONE
KK	2014-05-07	2014	may	20	14:21:00	14:26:00	00:05:00	NONE
KK	2014-05-07	2014	may	21	14:26:00	14:33:00	00:07:00	NONE
KK	2014-05-07	2014	may	9	14:37:00	14:42:00	00:05:00	NONE
KK	2014-05-07	2014	may	16	14:44:00	14:58:00	00:14:00	Mourning dove	B
KK	2014-05-07	2014	may	15	14:58:00	15:12:00	00:14:00	Ruby-throated hummingbird	A
KK	2014-05-07	2014	may	27	15:15:00	15:20:00	00:05:00	NONE
KK	2014-05-07	2014	may	24	15:22:00	15:31:00	00:09:00	Gray catbird	C
KK	2014-05-07	2014	may	23	15:35:00	15:39:00	00:04:00	NONE
CB	2014-05-08	2014	may	1	15:49:00	15:53:00	00:04:00	NONE
CB	2014-05-08	2014	may	2	15:54:00	15:57:00	00:03:00	NONE
CB	2014-05-08	2014	may	4	15:57:00	16:02:00	00:05:00	NONE
CB	2014-05-08	2014	may	10	16:05:00	16:10:00	00:05:00	NONE
CB	2014-05-08	2014	may	12	16:11:00	16:18:00	00:07:00	none		same AMGO, C
CB	2014-05-08	2014	may	7	16:18:00	16:33:00	00:15:00	american robin	A
CB	2014-05-08	2014	may	3	16:36:00	16:41:00	00:05:00	NONE
CB	2014-05-08	2014	may	14	16:41:00	16:49:00	00:08:00	hermit thrush	C
CB	2014-05-08	2014	may	8	16:49:00	16:51:00	00:02:00	NONE
CB	2014-05-08	2014	may	30	19:28:00	19:32:00	00:04:00	NONE
CG	2014-05-09	2014	may	1	14:30:00	14:35:00	00:05:00	Gray Catbird	B
CG	2014-05-09	2014	may	12	14:40:00	14:47:00	00:07:00	yellow-billed cuckoo	B
CB	2014-05-14	2014	may	17	16:55:00	17:01:00	00:06:00	NONE
CB	2014-05-14	2014	may	26	17:05:00	17:11:00	00:06:00	NONE
CB	2014-05-14	2014	may	20	17:12:00	17:20:00	00:08:00	Gray Catbird	A
CB	2014-05-14	2014	may	21	17:20:00	17:24:00	00:04:00	NONE
CB	2014-05-14	2014	may	9	17:27:00	17:31:00	00:04:00	NONE
CB	2014-05-14	2014	may	15	17:32:00	17:38:00	00:06:00	NONE
CB	2014-05-14	2014	may	16	17:39:00	17:43:00	00:04:00	NONE
CB	2014-05-14	2014	may	24	17:45:00	17:50:00	00:05:00	NONE
CB	2014-05-14	2014	may	27	17:51:00	17:54:00	00:03:00	NONE
CB	2014-05-14	2014	may	23	17:55:00	18:00:00	00:05:00	NONE
CB	2014-05-13	2014	may	7	18:59:00	19:03:00	00:04:00	NONE
CB	2014-05-13	2014	may	12	19:04:00	19:15:00	00:11:00	none		old cuckoo, B
CB	2014-05-13	2014	may	10	19:16:00	19:21:00	00:05:00	NONE
CB	2014-05-13	2014	may	4	19:25:00	19:28:00	00:03:00	NONE
CB	2014-05-13	2014	may	2	19:28:00	19:31:00	00:03:00	NONE
CB	2014-05-13	2014	may	1	19:32:00	19:36:00	00:04:00	NONE
CB	2014-05-13	2014	may	3	19:41:00	19:46:00	00:05:00	NONE
CB	2014-05-13	2014	may	14	19:46:00	19:52:00	00:06:00	none
CB	2014-05-13	2014	may	8	19:52:00	19:55:00	00:03:00	NONE
CB	2014-05-13	2014	may	30	19:56:00	20:00:00	00:04:00	NONE
KK	2014-05-14	2014	may	17	13:59:00	14:04:00	00:05:00	NONE
KK	2014-05-14	2014	may	26	14:06:00	14:14:00	00:08:00	NONE
KK	2014-05-14	2014	may	20	14:16:00	14:21:00	00:05:00	NONE
KK	2014-05-14	2014	may	21	14:21:00	14:27:00	00:06:00	NONE
KK	2014-05-14	2014	may	9	14:30:00	14:35:00	00:05:00	NONE
KK	2014-05-14	2014	may	16	14:36:00	14:42:00	00:06:00	NONE
KK	2014-05-14	2014	may	15	14:42:00	15:00:00	00:18:00	gray catbird	G
KK	2014-05-14	2014	may	27	15:05:00	15:11:00	00:06:00	NONE
KK	2014-05-14	2014	may	24	15:13:00	15:18:00	00:05:00	NONE
KK	2014-05-14	2014	may	23	15:20:00	15:24:00	00:04:00	NONE
KK	2014-05-19	2014	may	2	13:46:00	13:51:00	00:05:00	NONE
KK	2014-05-19	2014	may	4	13:51:00	13:55:00	00:04:00	NONE
KK	2014-05-19	2014	may	1	13:57:00	14:11:00	00:14:00	northern flicker	B
KK	2014-05-19	2014	may	10	14:21:00	14:30:00	00:09:00	american robin	D
KK	2014-05-19	2014	may	7	14:31:00	14:36:00	00:05:00	NONE
KK	2014-05-19	2014	may	12	14:38:00	14:46:00	00:08:00	Ruby-throated hummingbird	B
KK	2014-05-19	2014	may	3	14:48:00	14:53:00	00:05:00	NONE
KK	2014-05-19	2014	may	14	14:54:00	14:59:00	00:05:00	NONE
KK	2014-05-19	2014	may	8	15:00:00	15:04:00	00:04:00	NONE
RMS	2014-05-19	2014	may	11	17:31:00	17:40:00	00:09:00	unknown feather pile	B
KK	2014-05-21	2014	may	17	15:21:00	15:26:00	00:05:00	NONE
KK	2014-05-21	2014	may	26	15:29:00	15:36:00	00:07:00	NONE
KK	2014-05-21	2014	may	20	15:39:00	15:54:00	00:15:00	American Goldfinch	B
KK	2014-05-21	2014	may	21	15:54:00	16:00:00	00:06:00	NONE
KK	2014-05-21	2014	may	9	16:03:00	16:15:00	00:12:00	Yellow-billed Cuckoo	D
KK	2014-05-21	2014	may	16	16:17:00	16:22:00	00:05:00	NONE
KK	2014-05-21	2014	may	15	16:22:00	16:29:00	00:07:00	NONE
KK	2014-05-21	2014	may	27	16:34:00	16:38:00	00:04:00	NONE
KK	2014-05-21	2014	may	24	16:39:00	16:49:00	00:10:00	none
KK	2014-05-21	2014	may	23	16:52:00	16:57:00	00:05:00	NONE
RMS	2014-05-22	2014	may	11	18:03:00	18:07:00	00:04:00	NONE
RMS	2014-05-23	2014	may	15	15:20:00	15:27:00	00:07:00	none
RMS	2014-05-23	2014	may	16	15:27:00	15:35:00	00:08:00	NONE
RMS	2014-05-23	2014	may	20	15:39:00	15:46:00	00:07:00	none
RMS	2014-05-23	2014	may	21	15:46:00	15:52:00	00:06:00	NONE
RMS	2014-05-23	2014	may	11	15:55:00	16:02:00	00:07:00	NONE
KK	2014-05-26	2014	may	2	16:51:00	16:55:00	00:04:00	NONE
KK	2014-05-26	2014	may	4	16:55:00	17:00:00	00:05:00	NONE
KK	2014-05-26	2014	may	1	17:01:00	17:04:00	00:03:00	NONE
KK	2014-05-26	2014	may	10	17:05:00	17:12:00	00:07:00	common yellowthroat	C
KK	2014-05-26	2014	may	7	17:13:00	17:18:00	00:05:00	NONE
KK	2014-05-26	2014	may	12	17:20:00	17:26:00	00:06:00	NONE
KK	2014-05-26	2014	may	3	17:26:00	17:31:00	00:05:00	NONE
KK	2014-05-26	2014	may	14	17:32:00	17:36:00	00:04:00	NONE
KK	2014-05-26	2014	may	8	17:36:00	17:39:00	00:03:00	NONE
RMS	2014-05-27	2014	may	11	15:37:00	15:43:00	00:06:00	NONE
CB	2014-05-29	2014	may	7	09:17:00	09:24:00	00:07:00	none
CB	2014-05-29	2014	may	12	06:26:00	09:45:00	03:19:00	American Redstart	B
CB	2014-05-29	2014	may	x	x	x	x	Yellow-billed Cuckoo	F
CB	2014-05-29	2014	may	10	09:45:00	09:50:00	00:05:00	NONE
CB	2014-05-29	2014	may	1	09:53:00	09:56:00	00:03:00	NONE
CB	2014-05-29	2014	may	2	09:57:00	10:00:00	00:03:00	NONE
CB	2014-05-29	2014	may	4	10:00:00	10:04:00	00:04:00	NONE
CB	2014-05-29	2014	may	8	10:13:00	10:16:00	00:03:00	NONE
CB	2014-05-29	2014	may	14	10:16:00	10:26:00	00:10:00	European Starling	B
CB	2014-05-29	2014	may	x	x	x	x	Northern Cardinal	D
CB	2014-05-29	2014	may	3	10:26:00	10:31:00	00:05:00	NONE
CB	2014-05-29	2014	may	30	10:36:00	10:46:00	00:10:00	American Goldfinch	B
CB	2014-05-29	2014	may	x	x	x	x	yellow-billed cuckoo	C
KK	2014-06-02	2014	june	2	15:16:00	15:23:00	00:07:00	none
KK	2014-06-02	2014	june	4	15:24:00	15:35:00	00:11:00	none
KK	2014-06-02	2014	june	1	15:37:00	15:42:00	00:05:00	NONE
KK	2014-06-02	2014	june	10	15:47:00	16:00:00	00:13:00	none
KK	2014-06-02	2014	june	7	16:01:00	16:08:00	00:07:00	NONE
KK	2014-06-02	2014	june	12	16:09:00	16:33:00	00:24:00	Cedar waxwing	B
KK	2014-06-02	2014	june	3	16:38:00	16:47:00	00:09:00	none
KK	2014-06-02	2014	june	14	16:47:00	16:57:00	00:10:00	great crested flycatcher	B
KK	2014-06-02	2014	june	8	16:57:00	17:01:00	00:04:00	NONE
KK	2014-06-02	2014	june	30	17:05:00	17:10:00	00:05:00	none
KK	2014-06-04	2014	june	17	13:35:00	13:42:00	00:07:00	NONE
KK	2014-06-04	2014	june	26	13:45:00	13:56:00	00:11:00	none
KK	2014-06-04	2014	june	20	14:00:00	14:09:00	00:09:00	Mourning dove	A
KK	2014-06-04	2014	june	21	14:09:00	14:15:00	00:06:00	NONE
KK	2014-06-04	2014	june	9	14:19:00	14:24:00	00:05:00	NONE
KK	2014-06-04	2014	june	16	14:25:00	14:31:00	00:06:00	NONE
KK	2014-06-04	2014	june	15	14:31:00	14:37:00	00:06:00	NONE
KK	2014-06-04	2014	june	27	14:42:00	14:46:00	00:04:00	NONE
KK	2014-06-04	2014	june	24	14:47:00	14:57:00	00:10:00	House finch	A
KK	2014-06-04	2014	june	23	15:00:00	15:05:00	00:05:00	NONE
KK	2014-06-09	2014	june	2	14:39:00	14:44:00	00:05:00	NONE
KK	2014-06-09	2014	june	4	14:45:00	14:49:00	00:04:00	NONE
KK	2014-06-09	2014	june	1	14:50:00	14:54:00	00:04:00	NONE
KK	2014-06-09	2014	june	12	15:05:00	15:10:00	00:05:00	NONE
KK	2014-06-09	2014	june	7	15:11:00	15:18:00	00:07:00	NONE
KK	2014-06-09	2014	june	10	15:19:00	15:27:00	00:08:00	none
KK	2014-06-09	2014	june	3	15:34:00	15:39:00	00:05:00	NONE
KK	2014-06-09	2014	june	8	15:39:00	15:44:00	00:05:00	NONE
KK	2014-06-09	2014	june	14	15:44:00	15:50:00	00:06:00	none
KK	2014-06-09	2014	june	30	15:54:00	16:00:00	00:06:00	NONE
KK	2014-06-11	2014	june	17	14:12:00	14:19:00	00:07:00	NONE
KK	2014-06-11	2014	june	26	14:23:00	14:30:00	00:07:00	NONE
KK	2014-06-11	2014	june	20	14:33:00	14:39:00	00:06:00	NONE
KK	2014-06-11	2014	june	21	14:39:00	14:46:00	00:07:00	NONE
KK	2014-06-11	2014	june	9	14:50:00	14:56:00	00:06:00	NONE
KK	2014-06-11	2014	june	16	14:57:00	15:08:00	00:11:00	none
KK	2014-06-11	2014	june	15	15:08:00	15:16:00	00:08:00	NONE
KK	2014-06-11	2014	june	27	15:21:00	15:26:00	00:05:00	NONE
KK	2014-06-11	2014	june	24	15:28:00	15:35:00	00:07:00	NONE
KK	2014-06-11	2014	june	23	15:38:00	15:44:00	00:06:00	NONE
CB	2014-06-15	2014	june	17	13:13:00	13:20:00	00:07:00	NONE
CB	2014-06-15	2014	june	26	13:23:00	13:28:00	00:05:00	NONE
CB	2014-06-15	2014	june	20	13:33:00	13:53:00	00:20:00	unknown	B
CB	2014-06-15	2014	june	21	13:53:00	13:59:00	00:06:00	NONE
CB	2014-06-15	2014	june	9	14:10:00	14:13:00	00:03:00	Song sparrow	A
CB	2014-06-15	2014	june	15	14:14:00	14:24:00	00:10:00	none
CB	2014-06-15	2014	june	16	14:24:00	14:33:00	00:09:00	NONE
CB	2014-06-15	2014	june	24	14:36:00	14:48:00	00:12:00	none
CB	2014-06-15	2014	june	27	14:49:00	14:53:00	00:04:00	NONE
CB	2014-06-15	2014	june	23	14:55:00	14:59:00	00:04:00	NONE
KK	2014-06-16	2014	june	2	15:10:00	15:14:00	00:04:00	NONE
KK	2014-06-16	2014	june	4	15:14:00	15:18:00	00:04:00	NONE
KK	2014-06-16	2014	june	1	15:19:00	15:23:00	00:04:00	NONE
KK	2014-06-16	2014	june	12	15:28:00	15:33:00	00:05:00	NONE
KK	2014-06-16	2014	june	7	15:34:00	15:40:00	00:06:00	NONE
KK	2014-06-16	2014	june	10	15:41:00	15:46:00	00:05:00	NONE
KK	2014-06-16	2014	june	3	15:53:00	15:57:00	00:04:00	NONE
KK	2014-06-16	2014	june	8	15:57:00	16:01:00	00:04:00	NONE
KK	2014-06-16	2014	june	14	16:01:00	16:05:00	00:04:00	NONE
KK	2014-06-16	2014	june	30	16:09:00	16:15:00	00:06:00	NONE
KK	2014-06-18	2014	june	17	10:00:00	10:07:00	00:07:00	NONE
KK	2014-06-18	2014	june	26	10:10:00	10:19:00	00:09:00	NONE
KK	2014-06-18	2014	june	20	10:21:00	10:40:00	00:19:00	none
KK	2014-06-18	2014	june	21	10:40:00	10:47:00	00:07:00	NONE
KK	2014-06-18	2014	june	9	10:51:00	10:56:00	00:05:00	NONE
KK	2014-06-18	2014	june	16	10:57:00	11:03:00	00:06:00	NONE
KK	2014-06-18	2014	june	15	11:03:00	11:10:00	00:07:00	NONE
KK	2014-06-18	2014	june	27	11:14:00	11:18:00	00:04:00	NONE
KK	2014-06-18	2014	june	24	11:19:00	11:26:00	00:07:00	NONE
KK	2014-06-18	2014	june	23	11:40:00	11:45:00	00:05:00	NONE
KK	2014-06-23	2014	june	2	10:23:00	10:27:00	00:04:00	NONE
KK	2014-06-23	2014	june	4	10:27:00	10:31:00	00:04:00	NONE
KK	2014-06-23	2014	june	1	10:33:00	10:37:00	00:04:00	NONE
KK	2014-06-23	2014	june	12	10:44:00	10:49:00	00:05:00	NONE
KK	2014-06-23	2014	june	7	10:50:00	10:56:00	00:06:00	NONE
KK	2014-06-23	2014	june	10	10:57:00	11:03:00	00:06:00	NONE
KK	2014-06-23	2014	june	3	11:09:00	11:15:00	00:06:00	NONE
KK	2014-06-23	2014	june	8	11:15:00	11:19:00	00:04:00	NONE
KK	2014-06-23	2014	june	14	11:19:00	11:24:00	00:05:00	NONE
KK	2014-06-23	2014	june	30	11:27:00	11:32:00	00:05:00	NONE
KK	2014-06-25	2014	june	17	10:44:00	10:50:00	00:06:00	NONE
KK	2014-06-25	2014	june	26	10:54:00	11:00:00	00:06:00	NONE
KK	2014-06-25	2014	june	20	11:03:00	11:11:00	00:08:00	Unknown	D
KK	2014-06-25	2014	june	21	11:11:00	11:18:00	00:07:00	NONE
KK	2014-06-25	2014	june	9	11:22:00	11:26:00	00:04:00	NONE
KK	2014-06-25	2014	june	16	11:27:00	11:35:00	00:08:00	none
KK	2014-06-25	2014	june	15	11:35:00	11:43:00	00:08:00	NONE
KK	2014-06-25	2014	june	23	11:47:00	11:51:00	00:04:00	NONE
KK	2014-06-25	2014	june	24	11:51:00	11:58:00	00:07:00	NONE
KK	2014-06-25	2014	june	27	11:59:00	12:06:00	00:07:00	Northern mockingbird	D
KK	2014-06-30	2014	june	2	11:15:00	11:19:00	00:04:00	NONE
KK	2014-06-30	2014	june	4	11:20:00	11:24:00	00:04:00	NONE
KK	2014-06-30	2014	june	1	11:26:00	11:30:00	00:04:00	NONE
KK	2014-06-30	2014	june	12	11:35:00	11:41:00	00:06:00	NONE
KK	2014-06-30	2014	june	7	11:43:00	11:48:00	00:05:00	NONE
KK	2014-06-30	2014	june	10	11:49:00	11:55:00	00:06:00	NONE
KK	2014-06-30	2014	june	3	12:00:00	12:06:00	00:06:00	NONE
KK	2014-06-30	2014	june	8	12:06:00	12:10:00	00:04:00	NONE
KK	2014-06-30	2014	june	14	12:10:00	12:14:00	00:04:00	NONE
KK	2014-06-30	2014	june	30	12:18:00	12:24:00	00:06:00	NONE
KK	2014-07-02	2014	july	17	10:42:00	10:48:00	00:06:00	NONE
KK	2014-07-02	2014	july	26	10:52:00	10:59:00	00:07:00	NONE
KK	2014-07-02	2014	july	20	11:02:00	11:08:00	00:06:00	NONE
KK	2014-07-02	2014	july	21	11:08:00	11:14:00	00:06:00	NONE
KK	2014-07-02	2014	july	9	11:18:00	11:23:00	00:05:00	NONE
KK	2014-07-02	2014	july	16	11:24:00	11:32:00	00:08:00	Ovenbird	B
KK	2014-07-02	2014	july	15	11:32:00	11:40:00	00:08:00	NONE
KK	2014-07-02	2014	july	27	11:45:00	11:49:00	00:04:00	NONE
KK	2014-07-02	2014	july	24	11:50:00	11:56:00	00:06:00	NONE
KK	2014-07-02	2014	july	23	11:58:00	12:03:00	00:05:00	NONE
RMS	2014-07-02	2014	july	1	15:16:00	15:24:00	00:08:00	Mourning dove	B
RMS	2014-07-02	2014	july	10	15:27:00	15:30:00	00:03:00	NONE
RMS	2014-07-02	2014	july	12	15:31:00	15:41:00	00:10:00	american robin	D
RMS	2014-07-02	2014	july	x	x	x	x	Gray catbird	B
RMS	2014-07-02	2014	july	7	15:43:00	15:48:00	00:05:00	NONE
RMS	2014-07-02	2014	july	11	15:51:00	15:56:00	00:05:00	NONE
RMS	2014-07-03	2014	july	30	11:26:00	11:30:00	00:04:00	NONE
RMS	2014-07-03	2014	july	4	14:44:00	14:48:00	00:04:00	NONE
RMS	2014-07-03	2014	july	2	14:49:00	14:54:00	00:05:00	NONE
RMS	2014-07-03	2014	july	3	15:16:00	15:20:00	00:04:00	NONE
RMS	2014-07-03	2014	july	14	15:21:00	15:28:00	00:07:00	NONE
RMS	2014-07-03	2014	july	8	15:28:00	15:31:00	00:03:00	NONE
RMS	2014-07-03	2014	july	11	15:35:00	15:40:00	00:05:00	NONE
RMS	2014-07-03	2014	july	27	15:43:00	15:47:00	00:04:00	NONE
KK	2014-07-07	2014	july	2	11:38:00	11:48:00	00:10:00	american robin	B
KK	2014-07-07	2014	july	4	11:48:00	11:53:00	00:05:00	NONE
KK	2014-07-07	2014	july	1	11:54:00	11:59:00	00:05:00	NONE
KK	2014-07-07	2014	july	12	12:05:00	12:23:00	00:18:00	Ovenbird	D
KK	2014-07-07	2014	july	7	12:24:00	12:30:00	00:06:00	NONE
KK	2014-07-07	2014	july	10	12:31:00	12:42:00	00:11:00	American robin	F
KK	2014-07-07	2014	july	3	12:57:00	13:01:00	00:04:00	louisiana waterthrush	D
KK	2014-07-07	2014	july	8	01:01:00	01:06:00	00:05:00	NONE
KK	2014-07-07	2014	july	14	01:06:00	01:18:00	00:12:00	House finch	B
KK	2014-07-07	2014	july	30	01:23:00	01:37:00	00:14:00	none
CB	2014-07-13	2014	july	7	18:41:00	18:47:00	00:06:00	NONE
CB	2014-07-13	2014	july	12	18:47:00	18:56:00	00:09:00	none
CB	2014-07-13	2014	july	10	18:57:00	19:03:00	00:06:00	northern cardinal	E
CB	2014-07-13	2014	july	1	19:05:00	19:08:00	00:03:00	NONE
CB	2014-07-13	2014	july	2	19:09:00	19:12:00	00:03:00	NONE
CB	2014-07-13	2014	july	4	19:12:00	19:15:00	00:03:00	unknown	B
CB	2014-07-13	2014	july	3	19:19:00	19:26:00	00:07:00	unknown	C
CB	2014-07-13	2014	july	14	19:26:00	19:30:00	00:04:00	none
CB	2014-07-13	2014	july	8	19:30:00	19:32:00	00:02:00	NONE
CB	2014-07-13	2014	july	30	19:32:00	19:37:00	00:05:00	NONE
KK	2014-07-14	2014	july	2	10:30:00	10:38:00	00:08:00	unknown	B
KK	2014-07-14	2014	july	4	10:39:00	10:44:00	00:05:00	NONE
KK	2014-07-14	2014	july	1	10:45:00	10:49:00	00:04:00	NONE
KK	2014-07-14	2014	july	12	10:55:00	11:03:00	00:08:00	NONE
KK	2014-07-14	2014	july	7	11:04:00	11:10:00	00:06:00	NONE
KK	2014-07-14	2014	july	10	11:11:00	11:17:00	00:06:00	NONE
KK	2014-07-14	2014	july	3	11:23:00	11:31:00	00:08:00	NONE
KK	2014-07-14	2014	july	8	11:32:00	11:36:00	00:04:00	NONE
KK	2014-07-14	2014	july	14	11:36:00	11:41:00	00:05:00	NONE
KK	2014-07-14	2014	july	30	11:44:00	11:56:00	00:12:00	Red-winged blackbird	C
KK	2014-07-16	2014	july	17	15:00:00	15:14:00	00:14:00	Yellow-throated vireo	D
KK	2014-07-16	2014	july	x	x	x	x	unknown	C
KK	2014-07-16	2014	july	26	15:17:00	15:25:00	00:08:00	NONE
KK	2014-07-16	2014	july	20	15:29:00	15:34:00	00:05:00	NONE
KK	2014-07-16	2014	july	21	15:34:00	15:40:00	00:06:00	NONE
KK	2014-07-16	2014	july	9	15:43:00	15:48:00	00:05:00	NONE
KK	2014-07-16	2014	july	16	15:49:00	15:56:00	00:07:00	NONE
KK	2014-07-16	2014	july	15	15:56:00	16:06:00	00:10:00	SOSP	G
KK	2014-07-16	2014	july	27	16:11:00	16:15:00	00:04:00	NONE
KK	2014-07-16	2014	july	24	16:16:00	16:24:00	00:08:00	NONE
KK	2014-07-16	2014	july	23	16:26:00	16:36:00	00:10:00	none
RMS	2014-07-17	2014	july	12	15:38:00	15:43:00	00:05:00	NONE
RMS	2014-07-17	2014	july	11	15:45:00	15:56:00	00:11:00	american robin	A	feather pile
RMS	2014-07-18	2014	july	11	15:50:00	16:03:00	00:13:00	cedar waxwing	B
KK	2014-07-21	2014	july	2	10:46:00	10:50:00	00:04:00	NONE
KK	2014-07-21	2014	july	4	10:51:00	10:55:00	00:04:00	NONE
KK	2014-07-21	2014	july	1	10:56:00	11:00:00	00:04:00	NONE
KK	2014-07-21	2014	july	12	11:07:00	11:14:00	00:07:00	NONE
KK	2014-07-21	2014	july	7	11:15:00	11:20:00	00:05:00	NONE
KK	2014-07-21	2014	july	10	11:30:00	11:35:00	00:05:00	NONE
KK	2014-07-21	2014	july	3	11:41:00	11:47:00	00:06:00	NONE
KK	2014-07-21	2014	july	8	11:48:00	11:52:00	00:04:00	NONE
KK	2014-07-21	2014	july	14	11:52:00	11:56:00	00:04:00	NONE
KK	2014-07-21	2014	july	30	12:00:00	12:05:00	00:05:00	NONE
RMS	2014-07-21	2014	july	11	15:42:00	15:47:00	00:05:00	NONE
RMS	2014-07-21	2014	july	24	15:51:00	15:59:00	00:08:00	NONE
RMS	2014-07-21	2014	july	27	16:00:00	16:03:00	00:03:00	NONE
RMS	2014-07-21	2014	july	15	16:06:00	16:26:00	00:20:00	unknown feather pile	A
RMS	2014-07-21	204	july	x	x	x	x	unknown feather pile	B
RMS	2014-07-21	2014	july	16	16:26:00	16:29:00	00:03:00	unknown feather pile	B
RMS	2014-07-22	2014	july	11	16:07:00	16:16:00	00:09:00	none
KK	2014-07-23	2014	july	17	10:15:00	10:22:00	00:07:00	NONE
KK	2014-07-23	2014	july	26	10:26:00	10:35:00	00:09:00	NONE
KK	2014-07-23	2014	july	20	10:38:00	10:43:00	00:05:00	NONE
KK	2014-07-23	2014	july	21	10:43:00	10:56:00	00:13:00	Red-winged blackbird	C
KK	2014-07-23	2014	july	9	11:00:00	11:05:00	00:05:00	NONE
KK	2014-07-23	2014	july	16	11:06:00	11:12:00	00:06:00	NONE
KK	2014-07-23	2014	july	15	11:12:00	11:19:00	00:07:00	NONE
KK	2014-07-23	2014	july	27	11:24:00	11:29:00	00:05:00	NONE
KK	2014-07-23	2014	july	24	11:30:00	11:37:00	00:07:00	NONE
KK	2014-07-23	2014	july	23	11:39:00	11:44:00	00:05:00	NONE
KK	2014-07-28	2014	july	2	11:02:00	11:06:00	00:04:00	NONE
KK	2014-07-28	2014	july	4	11:07:00	11:11:00	00:04:00	NONE
KK	2014-07-28	2014	july	1	11:12:00	11:16:00	00:04:00	NONE
KK	2014-07-28	2014	july	12	11:22:00	11:28:00	00:06:00	NONE
KK	2014-07-28	2014	july	7	11:29:00	11:35:00	00:06:00	NONE
KK	2014-07-28	2014	july	10	11:36:00	11:41:00	00:05:00	NONE
KK	2014-07-28	2014	july	3	11:46:00	11:54:00	00:08:00	American robin	C
KK	2014-07-28	2014	july	8	11:55:00	11:59:00	00:04:00	NONE
KK	2014-07-28	2014	july	14	11:59:00	12:04:00	00:05:00	NONE
KK	2014-07-28	2014	july	30	12:05:00	12:15:00	00:10:00	Song sparrow	D
RMS	2014-07-29	2014	july	11	15:53:00	15:58:00	00:05:00	NONE
KK	2014-07-30	2014	july	17	10:45:00	10:52:00	00:07:00	NONE
KK	2014-07-30	2014	july	26	10:55:00	11:10:00	00:15:00	Field sparrow	F
KK	2014-07-30	2014	july	20	11:14:00	11:19:00	00:05:00	NONE
KK	2014-07-30	2014	july	21	11:19:00	11:25:00	00:06:00	NONE
KK	2014-07-30	2014	july	9	11:28:00	11:42:00	00:14:00	Mourning dove	B
KK	2014-07-30	2014	july	16	11:43:00	11:50:00	00:07:00	NONE
KK	2014-07-30	2014	july	15	11:50:00	11:56:00	00:06:00	NONE
KK	2014-07-30	2014	july	27	12:00:00	12:04:00	00:04:00	NONE
KK	2014-07-30	2014	july	24	12:05:00	12:11:00	00:06:00	NONE
KK	2014-07-30	2014	july	23	12:14:00	12:19:00	00:05:00	NONE
RMS	2014-07-30	2014	july	1	15:15:00	15:18:00	00:03:00	NONE
RMS	2014-07-30	2014	july	2	15:26:00	15:29:00	00:03:00	NONE
RMS	2014-07-30	2014	july	4	15:19:00	15:25:00	00:06:00	NONE
RMS	2014-07-30	2014	july	14	15:32:00	15:39:00	00:07:00	northern flicker	B	feather pile
RMS	2014-07-30	2014	july	7	15:44:00	15:50:00	00:06:00	NONE
RMS	2014-07-30	2014	july	11	15:56:00	16:10:00	00:14:00	Ruby-throated hummingbird	A
RMS	2014-07-30	2014	july	x	x	x	x	none		stunned WOWA, flew away, B
RMS	2014-08-01	2014	august	12	15:41:00	15:47:00	00:06:00	unknown	E
RMS	2014-08-01	2014	august	11	15:50:00	15:56:00	00:06:00	NONE
KK	2014-08-04	2014	august	2	11:14:00	11:18:00	00:04:00	NONE
KK	2014-08-04	2014	august	4	11:18:00	11:23:00	00:05:00	NONE
KK	2014-08-04	2014	august	1	11:24:00	11:29:00	00:05:00	NONE
KK	2014-08-04	2014	august	12	11:39:00	11:52:00	00:13:00	Northern cardinal	B
KK	2014-08-04	2014	august	7	11:53:00	12:05:00	00:12:00	Ruby-throated hummingbird	C
KK	2014-08-04	2014	august	10	12:06:00	12:12:00	00:06:00	NONE
KK	2014-08-04	2014	august	3	12:16:00	12:36:00	00:20:00	unknown	C
KK	2014-08-04	2014	august	x	00:00:00	00:00:00	00:00:00	American robin	C
KK	2014-08-04	2014	august	8	12:36:00	12:40:00	00:04:00	NONE
KK	2014-08-04	2014	august	14	12:40:00	12:44:00	00:04:00	NONE
KK	2014-08-04	2014	august	30	12:47:00	12:54:00	00:07:00	NONE
RMS	2014-08-04	2014	august	11	15:47:00	15:54:00	00:07:00	NONE
RMS	2014-08-05	2014	august	11	15:54:00	16:00:00	00:06:00	NONE
KK	2014-08-06	2014	august	17	11:05:00	11:12:00	00:07:00	NONE
KK	2014-08-06	2014	august	26	11:15:00	11:23:00	00:08:00	NONE
KK	2014-08-06	2014	august	20	11:26:00	11:32:00	00:06:00	NONE
KK	2014-08-06	2014	august	21	11:32:00	11:38:00	00:06:00	NONE
KK	2014-08-06	2014	august	9	11:41:00	11:46:00	00:05:00	NONE
KK	2014-08-06	2014	august	16	11:47:00	11:53:00	00:06:00	NONE
KK	2014-08-06	2014	august	15	11:53:00	12:11:00	00:18:00	Gray catbird	G
KK	2014-08-06	2014	august	27	12:18:00	12:27:00	00:09:00	American robin	D
KK	2014-08-06	2014	august	24	12:28:00	12:36:00	00:08:00	NONE
KK	2014-08-06	2014	august	23	12:38:00	12:43:00	00:05:00	NONE
KK	2014-08-13	2014	august	17	10:32:00	10:38:00	00:06:00	NONE
KK	2014-08-13	2014	august	26	10:40:00	10:47:00	00:07:00	NONE
KK	2014-08-13	2014	august	9	10:52:00	10:57:00	00:05:00	NONE
KK	2014-08-13	2014	august	20	11:59:00	12:05:00	00:06:00	NONE
KK	2014-08-13	2014	august	21	12:05:00	12:11:00	00:06:00	NONE
KK	2014-08-13	2014	august	16	12:14:00	12:19:00	00:05:00	NONE
KK	2014-08-13	2014	august	15	12:19:00	12:26:00	00:07:00	NONE
KK	2014-08-13	2014	august	27	12:30:00	12:35:00	00:05:00	NONE
KK	2014-08-13	2014	august	24	12:36:00	12:42:00	00:06:00	NONE
KK	2014-08-13	2014	august	23	12:43:00	12:48:00	00:05:00	NONE
RMS	2014-08-13	2014	august	11	15:49:00	15:55:00	00:06:00	none		window imprint, A
KK	2014-08-20	2014	august	17	10:42:00	10:51:00	00:09:00	American robin	D
KK	2014-08-20	2014	august	26	16:13:00	16:21:00	00:08:00	NONE
KK	2014-08-20	2014	august	20	16:24:00	16:30:00	00:06:00	NONE
KK	2014-08-20	2014	august	21	16:30:00	16:36:00	00:06:00	NONE
KK	2014-08-20	2014	august	9	16:39:00	16:44:00	00:05:00	NONE
KK	2014-08-20	2014	august	16	16:45:00	16:50:00	00:05:00	NONE
KK	2014-08-20	2014	august	15	16:50:00	16:56:00	00:06:00	NONE
KK	2014-08-20	2014	august	27	16:59:00	17:04:00	00:05:00	NONE
KK	2014-08-20	2014	august	24	17:05:00	17:12:00	00:07:00	gray catbird	A
KK	2014-08-20	2014	august	23	17:14:00	17:39:00	00:25:00	NONE
RMS	2014-08-21	2014	august	11	15:43:00	15:49:00	00:06:00	NONE
KK	2014-08-25	2014	august	2	10:33:00	10:43:00	00:10:00	Northern flicker	B
KK	2014-08-25	2014	august	4	10:43:00	10:50:00	00:07:00	NONE
KK	2014-08-25	2014	august	1	10:52:00	10:57:00	00:05:00	NONE
KK	2014-08-25	2014	august	12	11:07:00	11:13:00	00:06:00	NONE
KK	2014-08-25	2014	august	7	11:14:00	11:23:00	00:09:00	NONE
KK	2014-08-25	2014	august	10	11:24:00	11:30:00	00:06:00	NONE
KK	2014-08-25	2014	august	3	11:35:00	11:49:00	00:14:00	Ovenbird	C
KK	2014-08-25	2014	august	8	11:49:00	11:53:00	00:04:00	NONE
KK	2014-08-25	2014	august	14	11:53:00	11:58:00	00:05:00	NONE
KK	2014-08-25	2014	august	30	12:02:00	12:09:00	00:07:00	NONE
RMS	2014-08-25	2014	august	23	15:18:00	15:22:00	00:04:00	NONE
RMS	2014-08-25	2014	august	24	15:23:00	15:31:00	00:08:00	none
RMS	2014-08-25	2014	august	11	15:44:00	15:49:00	00:05:00	NONE
RMS	2014-08-26	2014	august	15	15:26:00	15:36:00	00:10:00	unknown feather pile	A	RTHU flew into window flew away
RMS	2014-08-26	2014	august	16	15:36:00	15:45:00	00:09:00	NONE
RMS	2014-08-26	2014	august	11	15:47:00	15:53:00	00:06:00	NONE
KK	2014-08-27	2014	august	17	11:10:00	11:16:00	00:06:00	NONE
KK	2014-08-27	2014	august	26	11:20:00	11:28:00	00:08:00	NONE
KK	2014-08-27	2014	august	20	11:31:00	11:37:00	00:06:00	NONE
KK	2014-08-27	2014	august	21	11:37:00	11:43:00	00:06:00	NONE
KK	2014-08-27	2014	august	9	11:47:00	11:52:00	00:05:00	NONE
KK	2014-08-27	2014	august	16	11:53:00	12:00:00	00:07:00	NONE
KK	2014-08-27	2014	august	15	12:00:00	12:07:00	00:07:00	NONE
KK	2014-08-27	2014	august	27	12:11:00	12:16:00	00:05:00	NONE
KK	2014-08-27	2014	august	24	12:17:00	12:23:00	00:06:00	NONE
KK	2014-08-27	2014	august	23	12:25:00	12:30:00	00:05:00	NONE
RMS	2014-08-27	2014	august	11	15:52:00	15:58:00	00:06:00	NONE
RMS	2014-08-29	2014	august	11	15:53:00	15:59:00	00:06:00	NONE
KK	2014-09-01	2014	september	2	15:47:00	15:51:00	00:04:00	NONE
KK	2014-09-01	2014	september	4	15:52:00	15:56:00	00:04:00	NONE
KK	2014-09-01	2014	september	1	15:57:00	16:01:00	00:04:00	NONE
KK	2014-09-01	2014	september	12	16:11:00	16:17:00	00:06:00	NONE
KK	2014-09-01	2014	september	7	16:18:00	16:25:00	00:07:00	NONE
KK	2014-09-01	2014	september	10	16:26:00	16:31:00	00:05:00	NONE
KK	2014-09-01	2014	september	3	16:36:00	16:46:00	00:10:00	none
KK	2014-09-01	2014	september	8	16:46:00	16:50:00	00:04:00	NONE
KK	2014-09-01	2014	september	14	16:50:00	16:55:00	00:05:00	NONE
KK	2014-09-01	2014	september	30	16:58:00	17:04:00	00:06:00	NONE
RMS	2014-09-02	2014	september	11	15:52:00	15:57:00	00:05:00	NONE
KK	2014-09-03	2014	september	17	11:09:00	11:15:00	00:06:00	NONE
KK	2014-09-03	2014	september	26	11:18:00	11:34:00	00:16:00	Common nighthawk	D
KK	2014-09-03	2014	september	20	11:37:00	11:43:00	00:06:00	NONE
KK	2014-09-03	2014	september	21	11:43:00	11:49:00	00:06:00	NONE
KK	2014-09-03	2014	september	9	11:52:00	11:57:00	00:05:00	NONE
KK	2014-09-03	2014	september	16	11:58:00	12:10:00	00:12:00	Ruby-throated hummingbird	D
KK	2014-09-03	2014	september	15	12:10:00	12:16:00	00:06:00	NONE
KK	2014-09-03	2014	september	27	12:21:00	12:25:00	00:04:00	NONE
KK	2014-09-03	2014	september	24	12:26:00	12:33:00	00:07:00	NONE
KK	2014-09-03	2014	september	23	12:35:00	12:40:00	00:05:00	NONE
RMS	2014-09-03	2014	september	11	17:22:00	17:26:00	00:04:00	NONE
RMS	2014-09-05	2014	september	2	15:02:00	15:04:00	00:02:00	NONE
RMS	2014-09-05	2014	september	4	15:05:00	15:09:00	00:04:00	NONE
RMS	2014-09-05	2014	september	1	15:09:00	15:12:00	00:03:00	NONE
RMS	2014-09-05	2014	september	10	15:16:00	15:22:00	00:06:00	NONE
RMS	2014-09-05	2014	september	12	15:26:00	15:31:00	00:05:00	NONE
RMS	2014-09-05	2014	september	7	15:32:00	15:38:00	00:06:00	NONE
RMS	2014-09-05	2014	september	3	15:40:00	15:42:00	00:02:00	none	C	oven still there on C
RMS	2014-09-05	2014	september	14	15:44:00	15:46:00	00:02:00	NONE
RMS	2014-09-05	2014	september	11	15:53:00	15:58:00	00:05:00	NONE
CG	2014-09-07	2014	september	4	16:08:00	16:15:00	00:07:00	NONE
CG	2014-09-07	2014	september	2	16:15:00	16:22:00	00:07:00	NONE
CG	2014-09-07	2014	september	1	16:22:00	16:30:00	00:08:00	Ruby-throated hummingbird	C
CG	2014-09-07	2014	september	10	16:32:00	16:39:00	00:07:00	NONE
CG	2014-09-07	2014	september	7	16:39:00	16:48:00	00:09:00	NONE
CG	2014-09-07	2014	september	12	16:48:00	16:55:00	00:07:00	NONE
CG	2014-09-07	2014	september	3	16:59:00	17:11:00	00:12:00	none
CG	2014-09-07	2014	september	14	17:11:00	17:18:00	00:07:00	NONE
CG	2014-09-07	2014	september	8	17:18:00	17:22:00	00:04:00	NONE
CG	2014-09-07	2014	september	30	17:25:00	17:36:00	00:11:00	NONE
CG	2014-09-08	2014	september	23	16:46:00	16:52:00	00:06:00	NONE
CG	2014-09-08	2014	september	24	16:52:00	17:01:00	00:09:00	NONE
CG	2014-09-08	2014	september	27	17:01:00	17:06:00	00:05:00	NONE
CG	2014-09-08	2014	september	16	17:10:00	17:30:00	00:20:00	none	C	print and a down feather on the window
CG	2014-09-08	2014	september	15	17:10:00	17:30:00	00:20:00	none
CG	2014-09-08	2014	september	9	17:30:00	17:36:00	00:06:00	NONE
CG	2014-09-08	2014	september	21	17:39:00	17:54:00	00:15:00	NONE
CG	2014-09-08	2014	september	20	17:39:00	17:54:00	00:15:00	NONE
CG	2014-09-08	2014	september	17	17:57:00	18:05:00	00:08:00	NONE
CG	2014-09-08	2014	september	26	18:07:00	18:14:00	00:07:00	NONE
RMS	2014-09-09	2014	september	11	15:55:00	16:01:00	00:06:00	NONE
KK	2014-09-10	2014	september	17	11:04:00	11:11:00	00:07:00	NONE
KK	2014-09-10	2014	september	26	11:15:00	11:23:00	00:08:00	NONE
KK	2014-09-10	2014	september	20	11:26:00	11:32:00	00:06:00	NONE
KK	2014-09-10	2014	september	21	11:32:00	11:38:00	00:06:00	NONE
KK	2014-09-10	2014	september	9	11:42:00	11:48:00	00:06:00	NONE
KK	2014-09-10	2014	september	16	11:49:00	11:55:00	00:06:00	NONE
KK	2014-09-10	2014	september	15	11:55:00	12:02:00	00:07:00	NONE
KK	2014-09-10	2014	september	27	12:06:00	12:10:00	00:04:00	NONE
KK	2014-09-10	2014	september	24	12:11:00	12:18:00	00:07:00	NONE
KK	2014-09-10	2014	september	23	12:20:00	12:26:00	00:06:00	NONE
eh	2014-09-11	2014	september	24	12:00:00	12:10:00	00:10:00	NONE
CG	2014-09-14	2014	september	4	16:28:00	16:33:00	00:05:00	NONE
CG	2014-09-14	2014	september	2	16:33:00	16:37:00	00:04:00	NONE
CG	2014-09-14	2014	september	1	16:37:00	16:42:00	00:05:00	NONE
CG	2014-09-14	2014	september	7	16:45:00	16:51:00	00:06:00	NONE
CG	2014-09-14	2014	september	10	16:51:00	17:00:00	00:09:00	NONE
CG	2014-09-14	2014	september	12	17:00:00	17:07:00	00:07:00	NONE
CG	2014-09-14	2014	september	3	17:10:00	17:17:00	00:07:00	NONE
CG	2014-09-14	2014	september	14	17:17:00	17:21:00	00:04:00	NONE
CG	2014-09-14	2014	september	8	17:21:00	17:25:00	00:04:00	NONE
CG	2014-09-14	2014	september	30	17:27:00	17:35:00	00:08:00	NONE
RMS	2014-09-14	2014	september	11	16:01:00	16:05:00	00:04:00	Ruby-throated hummingbird	C
CG	2014-09-15	2014	september	26	16:19:00	16:26:00	00:07:00	NONE
CG	2014-09-15	2014	september	17	16:28:00	16:33:00	00:05:00	NONE
CG	2014-09-15	2014	september	20	16:36:00	16:44:00	00:08:00	Ruby-throated hummingbird	A
CG	2014-09-15	2014	september	x	x	x	x	black-throated green warbler	E
CG	2014-09-15	2014	september	21	16:44:00	16:52:00	00:08:00	NONE
CG	2014-09-15	2014	september	15	16:54:00	17:04:00	00:10:00	none	D	window imprint 2nd floor,SOSP trying to fly at window twice, then flew away.
CG	2014-09-15	2014	september	16	17:04:00	17:14:00	00:10:00	NONE
CG	2014-09-15	2014	september	9	17:14:00	17:19:00	00:05:00	NONE
CG	2014-09-15	2014	september	23	17:21:00	17:27:00	00:06:00	NONE
CG	2014-09-15	2014	september	24	17:28:00	17:37:00	00:09:00	NONE
CG	2014-09-15	2014	september	27	17:37:00	17:45:00	00:08:00	unknown feather pile	D	Several tiny piles of feathers
KK	2014-09-15	2014	september	2	10:49:00	10:53:00	00:04:00	NONE
KK	2014-09-15	2014	september	4	10:53:00	10:58:00	00:05:00	NONE
KK	2014-09-15	2014	september	1	11:00:00	11:05:00	00:05:00	NONE
KK	2014-09-15	2014	september	12	11:15:00	11:24:00	00:09:00	Ruby-throated hummgingbird	F
KK	2014-09-15	2014	september	7	11:25:00	11:31:00	00:06:00	NONE
KK	2014-09-15	2014	september	10	11:32:00	11:37:00	00:05:00	NONE
KK	2014-09-15	2014	september	3	11:43:00	11:49:00	00:06:00	NONE
KK	2014-09-15	2014	september	8	11:49:00	11:53:00	00:04:00	NONE
KK	2014-09-15	2014	september	14	11:53:00	11:58:00	00:05:00	NONE
KK	2014-09-15	2014	september	30	12:01:00	12:06:00	00:05:00	NONE
RMS	2014-09-16	2014	september	11	15:50:00	16:05:00	00:15:00	Ruby-throated hummingbird	C
RMS	2014-09-16	2014	september	x	x	x	x	common yellowthroat	A
smh	2014-09-16	2014	september	24	12:00:00	12:10:00	00:10:00	NONE
KK	2014-09-17	2014	september	17	11:43:00	11:50:00	00:07:00	NONE
KK	2014-09-17	2014	september	26	11:53:00	12:00:00	00:07:00	NONE
KK	2014-09-17	2014	september	20	12:03:00	12:09:00	00:06:00	NONE
KK	2014-09-17	2014	september	21	12:09:00	12:15:00	00:06:00	NONE
KK	2014-09-17	2014	september	9	12:18:00	12:23:00	00:05:00	NONE
KK	2014-09-17	2014	september	16	12:24:00	12:29:00	00:05:00	NONE
KK	2014-09-17	2014	september	15	12:29:00	12:35:00	00:06:00	NONE
KK	2014-09-17	2014	september	27	12:40:00	12:52:00	00:12:00	unknown	D
KK	2014-09-17	2014	september	24	12:53:00	13:00:00	00:07:00	NONE
KK	2014-09-17	2014	september	23	13:01:00	13:11:00	00:10:00	Unknown	D
RMS	2014-09-17	2014	september	2	14:56:00	14:59:00	00:03:00	NONE
RMS	2014-09-17	2014	september	4	15:00:00	15:03:00	00:03:00	NONE
RMS	2014-09-17	2014	september	1	15:05:00	15:08:00	00:03:00	NONE
RMS	2014-09-17	2014	september	10	15:09:00	15:18:00	00:09:00	commone yellowthroat	D
RMS	2014-09-17	2014	september	12	15:19:00	15:30:00	00:11:00	Mourning dove	D
RMS	2014-09-17	2014	september	7	15:31:00	15:37:00	00:06:00	NONE
RMS	2014-09-17	2014	september	11	15:41:00	15:47:00	00:06:00	NONE		COYE still in bushes
eh	2014-09-18	2014	september	24	13:20:00	13:30:00	00:10:00	NONE
RMS	2014-09-18	2014	september	3	15:30:00	15:35:00	00:05:00	NONE
RMS	2014-09-18	2014	september	14	15:35:00	15:46:00	00:11:00	yellow warbler	D
RMS	2014-09-18	2014	september	11	15:51:00	16:03:00	00:12:00	unknown feather pile	B
RMS	2014-09-19	2014	september	1	16:07:00	16:10:00	00:03:00	none
RMS	2014-09-19	2014	september	2	16:12:00	16:20:00	00:08:00	unknown feather pile	B
RMS	2014-09-19	2014	september	4	16:20:00	16:24:00	00:04:00	NONE
RMS	2014-09-19	2014	september	10	16:27:00	16:33:00	00:06:00	NONE
RMS	2014-09-19	2014	september	7	16:34:00	16:40:00	00:06:00	NONE
RMS	2014-09-19	2014	september	12	16:41:00	16:45:00	00:04:00	NONE
RMS	2014-09-19	2014	september	3	16:47:00	16:49:00	00:02:00	NONE
RMS	2014-09-19	2014	september	14	16:50:00	17:01:00	00:11:00	black-throated blue warbler	A
RMS	2014-09-19	2014	september	15	17:11:00	17:17:00	00:06:00	NONE
RMS	2014-09-19	2014	september	16	17:17:00	17:23:00	00:06:00	NONE
RMS	2014-09-19	2014	september	27	17:26:00	17:32:00	00:06:00	NONE
RMS	2014-09-19	2014	september	11	15:50:00	16:05:00	00:15:00	unknown thrush	A
RMS	2014-09-19	2014	september	x	x	x	x	northern watherthrush	B	whole bird new
CB	2014-09-21	2014	september	17	13:26:00	13:34:00	00:08:00	Northern mockingbird	B/A
CB	2014-09-21	2014	september	26	13:39:00	13:46:00	00:07:00	NONE
CB	2014-09-21	2014	september	20	13:49:00	13:57:00	00:08:00	cedar waxwing	B
CB	2014-09-21	2014	september	21	13:57:00	14:04:00	00:07:00	unknown
CB	2014-09-21	2014	september	15	14:08:00	14:18:00	00:10:00	NONE
CB	2014-09-21	2014	september	16	14:18:00	14:29:00	00:11:00	Ruby-throated hummingbird	D
CB	2014-09-21	2014	september	x	x	x	x	unknown	D
CB	2014-09-21	2014	september	9	14:31:00	14:36:00	00:05:00	unknown	B
CB	2014-09-21	2014	september	27	14:40:00	14:42:00	00:02:00	NONE
CB	2014-09-21	2014	september	24	14:44:00	14:52:00	00:08:00	NONE
CB	2014-09-21	2014	september	23	14:53:00	14:56:00	00:03:00	NONE
CG	2014-09-21	2014	september	4	15:09:00	15:13:00	00:04:00	NONE
CG	2014-09-21	2014	september	2	15:13:00	15:20:00	00:07:00	none
CG	2014-09-21	2014	september	1	15:20:00	15:27:00	00:07:00	Ruby-throated hummingbird	D
CG	2014-09-21	2014	september	12	15:30:00	15:37:00	00:07:00	NONE
CG	2014-09-21	2014	september	10	15:37:00	15:46:00	00:09:00	NONE
CG	2014-09-21	2014	september	7	15:46:00	15:53:00	00:07:00	NONE
CG	2014-09-21	2014	september	3	15:57:00	16:02:00	00:05:00	NONE
CG	2014-09-21	2014	september	14	16:02:00	16:08:00	00:06:00	NONE
CG	2014-09-21	2014	september	8	16:08:00	16:11:00	00:03:00	NONE
CG	2014-09-21	2014	september	30	16:14:00	16:22:00	00:08:00	NONE
CG	2014-09-22	2014	september	26	16:14:00	16:21:00	00:07:00	NONE
CG	2014-09-22	2014	september	17	16:24:00	16:30:00	00:06:00	NONE
CG	2014-09-22	2014	september	20	16:32:00	16:38:00	00:06:00	NONE
CG	2014-09-22	2014	september	21	16:38:00	16:45:00	00:07:00	NONE
CG	2014-09-22	2014	september	15	16:48:00	16:57:00	00:09:00	none	D	Mark on window
CG	2014-09-22	2014	september	16	16:57:00	17:06:00	00:09:00	NONE
CG	2014-09-22	2014	september	9	17:06:00	17:11:00	00:05:00	NONE
CG	2014-09-22	2014	september	23	17:15:00	17:20:00	00:05:00	NONE
CG	2014-09-22	2014	september	24	17:21:00	17:31:00	00:10:00	NONE
CG	2014-09-22	2014	september	27	17:31:00	17:36:00	00:05:00	NONE
KK	2014-09-22	2014	september	2	11:43:00	11:48:00	00:05:00	NONE
KK	2014-09-22	2014	september	4	11:48:00	11:53:00	00:05:00	NONE
KK	2014-09-22	2014	september	1	11:55:00	12:09:00	00:14:00	NONE
[truncated: 1,086 more rows]

## Sheet: collisions by month
Survey Day	Year	Month	number of collisions
2013-10-19	2013	october	1
2013-10-20	2013	october	0
2013-10-22	2013	october	1
2013-10-23	2013	october	1
2013-10-24	2013	october	0
2013-10-25	2013	october	0
2013-10-26	2013	october	0
2013-10-27	2013	october	1
2013-10-28	2013	october	5
2013-10-29	2013	october	0
2013-10-30	2013	october	0
2013-10-31	2013	october	1
2013-11-01	2013	november	1
2013-11-02	2013	november	0
2013-11-03	2013	november	0
2013-11-04	2013	november	2
2013-11-05	2013	november	2
2013-11-06	2013	november	0
2013-11-07	2013	november	2
2013-11-08	2013	november	1
2013-11-09	2013	november	0
2013-11-10	2013	november	0
2013-11-11	2013	november	1
2013-11-12	2013	november	0
2013-11-13	2013	november	1
2013-11-14	2013	november	2
2013-11-15	2013	november	1
2013-11-16	2013	november	0
2013-11-17	2013	november	0
2013-11-18	2013	november	0
2013-11-19	2013	november	0
2013-11-20	2013	november	0
2013-11-21	2013	november	0
2013-11-24	2013	november	0
2013-11-25	2013	november	1
2013-12-02	2013	december	0
2013-12-03	2013	december	1
2013-12-04	2013	december	0
2013-12-05	2013	december	0
2013-12-09	2013	december	0
2013-12-10	2013	december	0
2013-12-11	2013	december	1
2013-12-13	2013	december	0
2013-12-15	2013	december	0
2013-12-16	2013	december	1
2013-12-17	2013	december	0
2013-12-19	2013	december	0
2014-01-02	2014	january	0
2014-01-03	2014	january	0
2014-01-06	2014	january	0
2014-01-08	2014	january	0
2014-01-09	2014	january	1
2014-01-10	2014	january	0
2014-01-12	2014	january	0
2014-01-13	2014	january	0
2014-01-14	2014	january	0
2014-01-15	2014	january	0
2014-01-16	2014	january	0
2014-01-17	2014	january	0
2014-01-19	2014	january	0
2014-01-20	2014	january	0
2014-01-22	2014	january	0
2014-01-23	2014	january	0
2014-01-24	2014	january	0
2014-01-27	2014	january	0
2014-01-28	2014	january	0
2014-01-31	2014	january	0
2014-02-03	2014	february	1
2014-02-04	2014	february	0
2014-02-05	2014	february	0
2014-02-06	2014	february	0
2014-02-09	2014	february	0
2014-02-10	2014	february	0
2014-02-11	2014	february	0
2014-02-17	2014	february	0
2014-02-19	2014	february	0
2014-02-20	2014	february	1
2014-02-23	2014	february	0
2014-02-24	2014	february	0
2014-02-26	2014	february	1
2014-02-28	2014	february	0
2014-03-04	2014	march	0
2014-03-07	2014	march	0
2014-03-10	2014	march	0
2014-03-11	2014	march	0
2014-03-12	2014	march	2
2014-03-13	2014	march	0
2014-03-16	2014	march	1
2014-03-17	2014	march	0
2014-03-18	2014	march	1
2014-03-19	2014	march	1
2014-03-20	2014	march	1
2014-03-21	2014	march	0
2014-03-23	2014	march	0
2014-03-24	2014	march	3
2014-03-26	2014	march	0
2014-03-27	2014	march	0
2014-03-30	2014	march	0
2014-03-31	2014	march	1
2014-04-01	2014	april	0
2014-04-02	2014	april	1
2014-04-03	2014	april	1
2014-04-04	2014	april	1
2014-04-06	2014	april	2
2014-04-07	2014	april	0
2014-04-08	2014	april	1
2014-04-09	2014	april	0
2014-04-10	2014	april	0
2014-04-11	2014	april	0
2014-04-14	2014	april	2
2014-04-15	2014	april	1
2014-04-16	2014	april	1
2014-04-17	2014	april	2
2014-04-18	2014	april	2
2014-04-21	2014	april	1
2014-04-22	2014	april	2
2014-04-23	2014	april	1
2014-04-24	2014	april	0
2014-04-25	2014	april	1
2014-04-26	2014	april	1
2014-04-28	2014	april	3
2014-04-29	2014	april	2
2014-04-30	2014	april	0
2014-05-01	2014	may	3
2014-05-05	2014	may	4
2014-05-06	2014	may	0
2014-05-07	2014	may	3
2014-05-08	2014	may	3
2014-05-09	2014	may	2
2014-05-13	2014	may	0
2014-05-14	2014	may	0
2014-05-14	2014	may	2
2014-05-19	2014	may	4
2014-05-21	2014	may	2
2014-05-22	2014	may	0
2014-05-23	2014	may	0
2014-05-26	2014	may	1
2014-05-27	2014	may	0
2014-05-29	2014	may	6
2014-06-02	2014	june	2
2014-06-04	2014	june	2
2014-06-09	2014	june	0
2014-06-11	2014	june	0
2014-06-15	2014	june	2
2014-06-16	2014	june	0
2014-06-18	2014	june	0
2014-06-23	2014	june	0
2014-06-25	2014	june	2
2014-06-30	2014	june	0
2014-07-02	2014	july	4
2014-07-03	2014	july	0
2014-07-07	2014	july	5
2014-07-13	2014	july	3
2014-07-14	2014	july	2
2014-07-16	2014	july	3
2014-07-17	2014	july	1
2014-07-18	2014	july	1
2014-07-21	2014	july	3
2014-07-22	2014	july	0
2014-07-23	2014	july	1
2014-07-28	2014	july	2
2014-07-29	2014	july	0
2014-07-30	2014	july	4
2014-08-01	2014	august	1
2014-08-04	2014	august	4
2014-08-05	2014	august	0
2014-08-06	2014	august	2
2014-08-13	2014	august	0
2014-08-20	2014	august	2
2014-08-21	2014	august	0
2014-08-25	2014	august	2
2014-08-26	2014	august	1
2014-08-27	2014	august	0
2014-08-29	2014	august	0
2014-09-01	2014	september	0
2014-09-02	2014	september	0
2014-09-03	2014	september	2
2014-09-05	2014	september	0
2014-09-07	2014	september	1
2014-09-08	2014	september	0
2014-09-09	2014	september	0
2014-09-10	2014	september	0
2014-09-11	2014	september	0
2014-09-14	2014	september	1
2014-09-15	2014	september	4
2014-09-16	2014	september	2
2014-09-17	2014	september	4
2014-09-18	2014	september	2
2014-09-19	2014	september	4
2014-09-21	2014	september	6
2014-09-22	2014	september	3
2014-09-24	2014	september	4
2014-09-26	2014	september	1
2014-09-28	2014	september	3
2014-09-29	2014	september	0
2014-09-30	2014	september	0
2014-10-01	2014	october	0
2014-10-02	2014	october	0
2014-10-03	2014	october	1
2014-10-05	2014	october	3
2014-10-07	2014	october	0
2014-10-10	2014	october	0
2014-10-13	2014	october	1
2014-10-14	2014	october	0
2014-10-15	2014	october	2
2014-10-17	2014	october	0
2014-10-19	2014	october	2
2014-10-20	2014	october	0
2014-10-21	2014	october	0
2014-10-22	2014	october	1
2014-10-23	2014	october	1
2014-10-24	2014	october	0
2014-10-28	2014	october	0
2014-10-29	2014	october	1
2014-10-30	2014	october	1
2014-10-31	2014	october	0
2014-11-03	2014	november	2
2014-11-04	2014	november	2
2014-11-05	2014	november	0
2014-11-07	2014	november	0
2014-11-09	2014	november	0
2014-11-10	2014	november	3
2014-11-11	2014	november	0
2014-11-12	2014	november	2
2014-11-13	2014	november	0
2014-11-16	2014	november	0
2014-11-18	2014	november	1
2014-11-19	2014	november	2
2014-11-21	2014	november	3
2014-11-25	2014	november	0
2014-11-30	2014	november	1
2014-12-01	2014	december	2
2014-12-02	2014	december	3
2014-12-03	2014	december	0
2014-12-05	2014	december	0
2014-12-08	2014	december	0
2014-12-11	2014	december	0
2014-12-15	2014	december	0
2014-12-17	2014	december	0
2014-12-19	2014	december	0
2014-12-22	2014	december	0
2014-12-24	2014	december	1
2014-12-26	2014	december	0
2014-12-30	2014	december	0
2014-12-31	2014	december	0
2015-01-05	2015	january	0
2015-01-13	2015	january	1
2015-01-14	2015	january	1
2015-01-21	2015	january	0
2015-01-26	2015	january	0
2015-01-27	2015	january	0
2015-01-28	2015	january	0
2015-01-29	2015	january	1
2015-01-30	2015	january	0
2015-02-02	2015	february	0
2015-02-04	2015	february	0
2015-02-10	2015	february	0
2015-02-11	2015	february	0
2015-02-12	2015	february	1
2015-02-25	2015	february	0
2015-03-02	2015	march	0
2015-03-10	2015	march	0
2015-03-12	2015	march	0
2015-03-16	2015	march	0
2015-03-17	2015	march	0
2015-03-18	2015	march	0
2015-03-20	2015	march	1
2015-03-22	2015	march	1
2015-03-23	2015	march	0
2015-03-24	2015	march	0
2015-03-25	2015	march	0
2015-03-26	2015	march	0
2015-03-29	2015	march	1
2015-03-31	2015	march	0
2015-04-01	2015	april	0
2015-04-02	2015	april	0
2015-04-06	2015	april	0
2015-04-07	2015	april	0
2015-04-08	2015	april	0
2015-04-10	2015	april	0
2015-04-12	2015	april	0
2015-04-13	2015	april	1
2015-04-15	2015	april	0
2015-04-17	2015	april	0
2015-04-20	2015	april	0
2015-04-21	2015	april	0
2015-04-23	2015	april	0
2015-04-24	2015	april	0
2015-04-27	2015	april	1
2015-04-28	2015	april	2
2015-04-29	2015	april	0
2015-05-03	2015	may	0
2015-05-04	2015	may	3
2015-05-06	2015	may	2
2015-05-11	2015	may	0
2015-05-13	2015	may	2
2015-05-20	2015	may	2
2015-05-27	2015	may	3

## Sheet: collisions by bldg
Observer	Survey Day	Building #	number of collisions
KA	2013-10-19	1	0
KA	2013-10-19	2	0
KA	2013-10-19	3	0
KA	2013-10-19	4	0
KA	2013-10-19	7	0
KA	2013-10-19	8	0
JC	2013-10-19	9	0
KA	2013-10-19	10	0
KA	2013-10-19	12	1
KA	2013-10-19	14	0
JC	2013-10-19	15	0
JC	2013-10-19	16	0
JC	2013-10-19	17	0
JC	2013-10-19	20	0
JC	2013-10-19	21	0
JC	2013-10-19	26	0
KA	2013-10-19	30	0
JC	2013-10-20	2	0
JC	2013-10-20	3	0
JC	2013-10-20	4	0
JC	2013-10-20	7	0
JC	2013-10-20	8	0
CB	2013-10-20	9	0
JC	2013-10-20	10	0
JC	2013-10-20	12	0
JC	2013-10-20	14	0
CB	2013-10-20	15	0
CB	2013-10-20	16	0
CB	2013-10-20	17	0
CB	2013-10-20	20	0
CB	2013-10-20	21	0
CB	2013-10-20	23	0
CB	2013-10-20	24	0
CB	2013-10-20	26	0
CB	2013-10-20	27	0
CB	2013-10-22	1	0
CB	2013-10-22	2	0
CB	2013-10-22	3	0
CB	2013-10-22	4	0
CB	2013-10-22	7	0
CB	2013-10-22	8	0
CB	2013-10-22	10	0
CB	2013-10-22	12	0
CB	2013-10-22	14	0
BK	2013-10-22	17	1
BK	2013-10-22	21	0
BK	2013-10-22	23	0
BK	2013-10-22	24	0
BK	2013-10-22	26	0
BK	2013-10-22	27	0
CB	2013-10-22	30	0
RMS	2013-10-23	1	0
RMS	2013-10-23	2	0
RMS	2013-10-23	3	0
RMS	2013-10-23	4	0
RMS	2013-10-23	7	0
RMS	2013-10-23	8	0
KA	2013-10-23	9	0
RMS	2013-10-23	10	1
RMS	2013-10-23	11	0
RMS	2013-10-23	12	0
RMS	2013-10-23	14	0
KA	2013-10-23	15	0
KA	2013-10-23	16	0
KA	2013-10-23	17	0
KA	2013-10-23	20	0
KA	2013-10-23	21	0
KA	2013-10-23	23	0
KA	2013-10-23	24	0
KA	2013-10-23	26	0
KA	2013-10-23	27	0
JC	2013-10-24	1	0
JC	2013-10-24	2	0
JC	2013-10-24	3	0
JC	2013-10-24	4	0
JC	2013-10-24	7	0
JC	2013-10-24	8	0
CB	2013-10-24	9	0
JC	2013-10-24	10	0
JC	2013-10-24	12	0
JC	2013-10-24	14	0
CB	2013-10-24	15	0
CB	2013-10-24	16	0
CB	2013-10-24	17	0
CB	2013-10-24	20	0
CB	2013-10-24	21	0
CB	2013-10-24	23	0
CB	2013-10-24	24	0
CB	2013-10-24	26	0
CB	2013-10-24	27	0
EF	2013-10-25	9	0
JC	2013-10-25	9	0
EF	2013-10-25	15	0
JC	2013-10-25	15	0
EF	2013-10-25	16	0
JC	2013-10-25	16	0
EF	2013-10-25	17	0
JC	2013-10-25	17	0
EF	2013-10-25	20	0
JC	2013-10-25	20	0
EF	2013-10-25	21	0
JC	2013-10-25	21	0
JC	2013-10-25	23	0
JC	2013-10-25	24	0
EF	2013-10-25	26	0
JC	2013-10-25	26	0
JC	2013-10-25	27	0
JC	2013-10-26	1	0
JC	2013-10-26	2	0
JC	2013-10-26	3	0
JC	2013-10-26	4	0
JC	2013-10-26	7	0
JC	2013-10-26	8	0
JC	2013-10-26	10	0
JC	2013-10-26	12	0
JC	2013-10-26	14	0
KM	2013-10-27	7	1
CB	2013-10-27	9	0
CB	2013-10-27	15	0
CB	2013-10-27	16	0
CB	2013-10-27	17	0
CB	2013-10-27	20	0
CB	2013-10-27	21	0
CB	2013-10-27	23	0
CB	2013-10-27	24	0
CB	2013-10-27	26	0
CB	2013-10-27	27	0
MSG	2013-10-28	9	1
RMS	2013-10-28	11	1
MSG	2013-10-28	15	2
MSG	2013-10-28	16	0
RMS	2013-10-28	17	0
MSG	2013-10-28	20	1
MSG	2013-10-28	21	0
RMS	2013-10-28	23	0
RMS	2013-10-28	24	0
MSG	2013-10-28	26	0
RMS	2013-10-28	27	0
CK	2013-10-29	1	0
CK	2013-10-29	2	0
CK	2013-10-29	4	0
CK	2013-10-29	7	0
CB	2013-10-29	9	0
CK	2013-10-29	10	0
RMS	2013-10-29	11	0
CB	2013-10-29	15	0
CK	2013-10-29	15	0
CB	2013-10-29	16	0
CB	2013-10-29	17	0
CB	2013-10-29	20	0
CB	2013-10-29	21	0
CB	2013-10-29	23	0
CB	2013-10-29	24	0
CB	2013-10-29	26	0
CB	2013-10-29	27	0
KA	2013-10-30	1	0
KA	2013-10-30	2	0
KA	2013-10-30	3	0
KA	2013-10-30	4	0
KA	2013-10-30	7	0
KA	2013-10-30	8	0
KA	2013-10-30	10	0
KA	2013-10-30	12	0
KA	2013-10-30	14	0
KA	2013-10-30	30	0
CB	2013-10-31	1	0
CB	2013-10-31	2	0
CB	2013-10-31	3	0
CB	2013-10-31	4	0
CB	2013-10-31	7	1
CB	2013-10-31	8	0
CK	2013-10-31	9	0
CB	2013-10-31	10	0
CB	2013-10-31	12	0
CB	2013-10-31	14	0
CK	2013-10-31	15	0
CK	2013-10-31	17	0
CK	2013-10-31	20	0
CK	2013-10-31	21	0
CK	2013-10-31	23	0
CK	2013-10-31	24	0
CK	2013-10-31	26	0
CK	2013-10-31	27	0
CB	2013-10-31	30	0
BK	2013-11-01	1	0
BK	2013-11-01	2	0
BK	2013-11-01	3	0
BK	2013-11-01	4	1
BK	2013-11-01	7	0
BK	2013-11-01	8	0
BK	2013-11-01	10	0
RMS	2013-11-01	11	0
BK	2013-11-01	12	0
BK	2013-11-01	14	0
EF	2013-11-02	9	0
JC	2013-11-02	9	0
EF	2013-11-02	15	0
JC	2013-11-02	15	0
EF	2013-11-02	16	0
JC	2013-11-02	16	0
EF	2013-11-02	17	0
JC	2013-11-02	17	0
EF	2013-11-02	20	0
JC	2013-11-02	20	0
EF	2013-11-02	21	0
JC	2013-11-02	21	0
JC	2013-11-02	23	0
JC	2013-11-02	24	0
EF	2013-11-02	26	0
JC	2013-11-02	26	0
JC	2013-11-02	27	0
CB	2013-11-03	1	0
CB	2013-11-03	2	0
CB	2013-11-03	3	0
CB	2013-11-03	4	0
CB	2013-11-03	7	0
CB	2013-11-03	8	0
CB	2013-11-03	10	0
CB	2013-11-03	12	0
CB	2013-11-03	14	0
CB	2013-11-03	30	0
RMS	2013-11-04	1	0
RMS	2013-11-04	2	0
BK	2013-11-04	3	0
RMS	2013-11-04	4	0
BK	2013-11-04	7	0
BK	2013-11-04	8	0
BK	2013-11-04	10	0
RMS	2013-11-04	11	2
BK	2013-11-04	12	0
BK	2013-11-04	14	0
CK	2013-11-05	1	0
CK	2013-11-05	2	0
CK	2013-11-05	3	0
CK	2013-11-05	4	0
CK	2013-11-05	7	0
CK	2013-11-05	8	0
CB	2013-11-05	9	0
CK	2013-11-05	10	0
CK	2013-11-05	12	0
CK	2013-11-05	14	0
CB	2013-11-05	15	0
CB	2013-11-05	16	2
CB	2013-11-05	17	0
CB	2013-11-05	20	0
CB	2013-11-05	21	0
CB	2013-11-05	23	0
CB	2013-11-05	24	0
CB	2013-11-05	26	0
CB	2013-11-05	27	0
KA	2013-11-06	9	0
RMS	2013-11-06	11	0
KA	2013-11-06	15	0
KA	2013-11-06	16	0
KA	2013-11-06	17	0
KA	2013-11-06	20	0
KA	2013-11-06	21	0
KA	2013-11-06	23	0
KA	2013-11-06	24	0
KA	2013-11-06	26	0
KA	2013-11-06	27	0
CB	2013-11-07	1	0
CB	2013-11-07	2	0
CB	2013-11-07	3	1
CB	2013-11-07	4	0
CB	2013-11-07	7	0
CB	2013-11-07	8	0
CK	2013-11-07	9	0
CB	2013-11-07	10	0
CB	2013-11-07	12	1
CB	2013-11-07	14	0
CK	2013-11-07	15	0
CK	2013-11-07	17	0
CK	2013-11-07	20	0
CK	2013-11-07	20	0
CK	2013-11-07	21	0
CK	2013-11-07	23	0
CK	2013-11-07	24	0
CK	2013-11-07	26	0
CK	2013-11-07	27	0
CB	2013-11-07	30	0
JC	2013-11-08	1	0
JC	2013-11-08	2	0
JC	2013-11-08	3	0
JC	2013-11-08	4	0
JC	2013-11-08	7	0
JC	2013-11-08	8	0
JC	2013-11-08	10	0
RMS	2013-11-08	11	1
JC	2013-11-08	12	0
JC	2013-11-08	14	0
LV	2013-11-08	17	0
LV	2013-11-08	23	0
LV	2013-11-08	24	0
LV	2013-11-08	27	0
JC	2013-11-09	9	0
JC	2013-11-09	15	0
JC	2013-11-09	16	0
JC	2013-11-09	17	0
JC	2013-11-09	20	0
JC	2013-11-09	21	0
JC	2013-11-09	23	0
JC	2013-11-09	24	0
JC	2013-11-09	26	0
JC	2013-11-09	27	0
CB	2013-11-10	9	0
CB	2013-11-10	15	0
CB	2013-11-10	16	0
CB	2013-11-10	17	0
CB	2013-11-10	20	0
CB	2013-11-10	21	0
CB	2013-11-10	23	0
CB	2013-11-10	24	0
CB	2013-11-10	26	0
CB	2013-11-10	27	0
MSG	2013-11-11	1	0
MSG	2013-11-11	2	0
RMS	2013-11-11	3	0
MSG	2013-11-11	4	0
RMS	2013-11-11	7	0
MSG	2013-11-11	9	0
MSG	2013-11-11	10	0
RMS	2013-11-11	11	0
MSG	2013-11-11	12	0
RMS	2013-11-11	14	0
MSG	2013-11-11	15	0
MSG	2013-11-11	16	0
MSG	2013-11-11	20	0
MSG	2013-11-11	21	0
RMS	2013-11-11	23	0
RMS	2013-11-11	24	1
RMS	2013-11-11	27	0
CK	2013-11-12	1	0
CK	2013-11-12	2	0
CK	2013-11-12	3	0
CK	2013-11-12	4	0
CK	2013-11-12	7	0
CK	2013-11-12	7	0
CK	2013-11-12	8	0
CB	2013-11-12	9	0
CK	2013-11-12	10	0
RMS	2013-11-12	11	0
CK	2013-11-12	12	0
CK	2013-11-12	14	0
CB	2013-11-12	15	0
CB	2013-11-12	16	0
CB	2013-11-12	17	0
CB	2013-11-12	20	0
CB	2013-11-12	21	0
CB	2013-11-12	23	0
CB	2013-11-12	24	0
CB	2013-11-12	26	0
CB	2013-11-12	27	0
RMS	2013-11-13	11	1
CB	2013-11-14	1	1
CB	2013-11-14	2	0
CB	2013-11-14	3	1
CB	2013-11-14	4	0
CB	2013-11-14	7	0
CB	2013-11-14	8	0
CK	2013-11-14	9	0
CB	2013-11-14	10	0
RMS	2013-11-14	11	0
CB	2013-11-14	12	0
CB	2013-11-14	14	0
CK	2013-11-14	15	0
CK	2013-11-14	17	0
CK	2013-11-14	20	0
CK	2013-11-14	21	0
CK	2013-11-14	23	0
CK	2013-11-14	24	0
CK	2013-11-14	26	0
CK	2013-11-14	27	0
CB	2013-11-14	30	0
LV	2013-11-15	1	0
LV	2013-11-15	2	0
LV	2013-11-15	3	0
LV	2013-11-15	4	0
LV	2013-11-15	7	0
LV	2013-11-15	8	1
LV	2013-11-15	10	0
RMS	2013-11-15	11	0
LV	2013-11-15	12	0
LV	2013-11-15	14	0
JC	2013-11-16	1	0
JC	2013-11-16	2	0
JC	2013-11-16	3	0
JC	2013-11-16	4	0
JC	2013-11-16	7	0
JC	2013-11-16	8	0
EF	2013-11-16	9	0
JC	2013-11-16	10	0
JC	2013-11-16	12	0
JC	2013-11-16	14	0
EF	2013-11-16	15	0
EF	2013-11-16	16	0
EF	2013-11-16	17	0
EF	2013-11-16	20	0
EF	2013-11-16	21	0
EF	2013-11-16	26	0
CB	2013-11-17	1	0
CB	2013-11-17	2	0
CB	2013-11-17	3	0
CB	2013-11-17	4	0
CB	2013-11-17	7	0
CB	2013-11-17	8	0
CB	2013-11-17	10	0
CB	2013-11-17	12	0
CB	2013-11-17	14	0
CB	2013-11-17	30	0
BK	2013-11-18	1	0
BK	2013-11-18	2	0
MSG	2013-11-18	3	0
BK	2013-11-18	4	0
MSG	2013-11-18	7	0
MSG	2013-11-18	8	0
KK	2013-11-18	9	0
MSG	2013-11-18	10	0
RMS	2013-11-18	11	0
MSG	2013-11-18	12	0
MSG	2013-11-18	14	0
KK	2013-11-18	15	0
KK	2013-11-18	16	0
KK	2013-11-18	17	0
KK	2013-11-18	20	0
KK	2013-11-18	21	0
KK	2013-11-18	23	0
KK	2013-11-18	24	0
KK	2013-11-18	26	0
KK	2013-11-18	27	0
CB	2013-11-19	9	0
CB	2013-11-19	15	0
CB	2013-11-19	16	0
CB	2013-11-19	17	0
CB	2013-11-19	20	0
CB	2013-11-19	21	0
CB	2013-11-19	23	0
CB	2013-11-19	24	0
CB	2013-11-19	26	0
CB	2013-11-19	27	0
KK	2013-11-20	1	0
KK	2013-11-20	2	0
KK	2013-11-20	3	0
KK	2013-11-20	4	0
KK	2013-11-20	7	0
KK	2013-11-20	8	0
KK	2013-11-20	10	0
RMS	2013-11-20	11	0
KK	2013-11-20	12	0
KK	2013-11-20	14	0
CB	2013-11-21	1	0
CB	2013-11-21	2	0
CB	2013-11-21	3	0
CB	2013-11-21	4	0
CB	2013-11-21	7	0
CB	2013-11-21	8	0
CK	2013-11-21	9	0
CB	2013-11-21	10	0
CB	2013-11-21	12	0
CB	2013-11-21	14	0
CK	2013-11-21	15	0
CK	2013-11-21	17	0
CK	2013-11-21	20	0
CK	2013-11-21	21	0
CK	2013-11-21	23	0
CK	2013-11-21	24	0
CK	2013-11-21	26	0
CK	2013-11-21	27	0
CB	2013-11-21	30	0
CB	2013-11-24	9	0
CB	2013-11-24	15	0
CB	2013-11-24	16	0
CB	2013-11-24	17	0
CB	2013-11-24	20	0
CB	2013-11-24	21	0
CB	2013-11-24	23	0
CB	2013-11-24	24	0
CB	2013-11-24	26	0
CB	2013-11-24	27	0
RMS	2013-11-25	11	1
KK	2013-12-02	1	0
KK	2013-12-02	2	0
KK	2013-12-02	3	0
KK	2013-12-02	4	0
KK	2013-12-02	7	0
KK	2013-12-02	8	0
KK	2013-12-02	10	0
KK	2013-12-02	12	0
KK	2013-12-02	14	0
CK	2013-12-03	1	0
CK	2013-12-03	2	0
CK	2013-12-03	3	0
CK	2013-12-03	4	0
CK	2013-12-03	7	0
CK	2013-12-03	8	0
CK	2013-12-03	10	0
CK	2013-12-03	12	0
CK	2013-12-03	14	0
CB	2013-12-03	16	1
KK	2013-12-04	9	0
RMS	2013-12-04	11	0
KK	2013-12-04	15	0
KK	2013-12-04	16	0
KK	2013-12-04	17	0
KK	2013-12-04	20	0
KK	2013-12-04	21	0
KK	2013-12-04	23	0
KK	2013-12-04	24	0
KK	2013-12-04	26	0
KK	2013-12-04	27	0
CK	2013-12-05	9	0
CK	2013-12-05	15	0
CK	2013-12-05	17	0
CK	2013-12-05	20	0
CK	2013-12-05	21	0
CK	2013-12-05	23	0
CK	2013-12-05	24	0
CK	2013-12-05	26	0
CK	2013-12-05	27	0
KK	2013-12-09	9	0
KK	2013-12-09	15	0
KK	2013-12-09	16	0
KK	2013-12-09	17	0
KK	2013-12-09	20	0
KK	2013-12-09	21	0
KK	2013-12-09	23	0
KK	2013-12-09	24	0
KK	2013-12-09	26	0
KK	2013-12-09	27	0
CB	2013-12-10	9	0
CB	2013-12-10	15	0
CB	2013-12-10	16	0
CB	2013-12-10	17	0
CB	2013-12-10	20	0
CB	2013-12-10	21	0
CB	2013-12-10	23	0
CB	2013-12-10	24	0
CB	2013-12-10	26	0
KK	2013-12-11	1	0
KK	2013-12-11	2	0
KK	2013-12-11	3	0
KK	2013-12-11	4	0
KK	2013-12-11	7	1
KK	2013-12-11	8	0
KK	2013-12-11	10	0
KK	2013-12-11	12	0
KK	2013-12-11	14	0
RMS	2013-12-13	11	0
CB	2013-12-15	9	0
CB	2013-12-15	15	0
CB	2013-12-15	16	0
CB	2013-12-15	17	0
CB	2013-12-15	20	0
CB	2013-12-15	21	0
CB	2013-12-15	23	0
CB	2013-12-15	24	0
CB	2013-12-15	26	0
CB	2013-12-15	27	0
KK	2013-12-16	1	0
KK	2013-12-16	2	0
KK	2013-12-16	3	0
KK	2013-12-16	4	1
KK	2013-12-16	7	0
KK	2013-12-16	8	0
KK	2013-12-16	10	0
KK	2013-12-16	12	0
KK	2013-12-16	14	0
CB	2013-12-17	9	0
RMS	2013-12-17	11	0
CB	2013-12-17	15	0
CB	2013-12-17	16	0
CB	2013-12-17	17	0
CB	2013-12-17	20	0
CB	2013-12-17	21	0
CB	2013-12-17	23	0
CB	2013-12-17	24	0
CB	2013-12-17	26	0
CB	2013-12-17	27	0
CB	2013-12-19	9	0
CB	2013-12-19	15	0
CB	2013-12-19	16	0
CB	2013-12-19	17	0
CB	2013-12-19	20	0
CB	2013-12-19	21	0
CB	2013-12-19	23	0
CB	2013-12-19	24	0
CB	2013-12-19	26	0
CB	2013-12-19	27	0
RMS	2014-01-02	11	0
RMS	2014-01-03	11	0
KK	2014-01-06	1	0
KK	2014-01-06	2	0
KK	2014-01-06	3	0
KK	2014-01-06	4	0
KK	2014-01-06	7	0
KK	2014-01-06	8	0
KK	2014-01-06	10	0
KK	2014-01-06	12	0
KK	2014-01-06	14	0
KK	2014-01-08	9	0
KK	2014-01-08	15	0
KK	2014-01-08	16	0
KK	2014-01-08	17	0
KK	2014-01-08	20	0
KK	2014-01-08	21	0
KK	2014-01-08	23	0
KK	2014-01-08	24	0
KK	2014-01-08	26	0
KK	2014-01-08	27	0
CB	2014-01-09	1	0
CB	2014-01-09	2	0
CB	2014-01-09	3	0
CB	2014-01-09	4	0
CB	2014-01-09	7	1
CB	2014-01-09	8	0
CB	2014-01-09	10	0
RMS	2014-01-09	11	0
CB	2014-01-09	12	0
CB	2014-01-09	14	0
CB	2014-01-09	30	0
RMS	2014-01-10	11	0
CB	2014-01-12	9	0
CB	2014-01-12	15	0
CB	2014-01-12	16	0
CB	2014-01-12	17	0
CB	2014-01-12	20	0
CB	2014-01-12	21	0
CB	2014-01-12	23	0
CB	2014-01-12	24	0
CB	2014-01-12	26	0
CB	2014-01-12	27	0
KK	2014-01-13	1	0
KK	2014-01-13	2	0
KK	2014-01-13	3	0
KK	2014-01-13	4	0
KK	2014-01-13	7	0
KK	2014-01-13	8	0
KK	2014-01-13	10	0
KK	2014-01-13	12	0
KK	2014-01-13	14	0
CB	2014-01-14	1	0
CB	2014-01-14	2	0
CB	2014-01-14	3	0
CB	2014-01-14	4	0
CB	2014-01-14	7	0
CB	2014-01-14	8	0
CB	2014-01-14	10	0
CB	2014-01-14	12	0
CB	2014-01-14	14	0
CB	2014-01-14	30	0
KK	2014-01-15	9	0
KK	2014-01-15	15	0
KK	2014-01-15	16	0
KK	2014-01-15	17	0
KK	2014-01-15	20	0
KK	2014-01-15	21	0
KK	2014-01-15	23	0
KK	2014-01-15	24	0
KK	2014-01-15	26	0
KK	2014-01-15	27	0
CB	2014-01-16	1	0
CB	2014-01-16	2	0
CB	2014-01-16	3	0
CB	2014-01-16	4	0
CB	2014-01-16	7	0
CB	2014-01-16	8	0
CB	2014-01-16	10	0
CB	2014-01-16	12	0
CB	2014-01-16	14	0
CB	2014-01-16	30	0
RMS	2014-01-17	11	0
CB	2014-01-19	9	0
CB	2014-01-19	15	0
CB	2014-01-19	16	0
CB	2014-01-19	17	0
CB	2014-01-19	20	0
CB	2014-01-19	21	0
CB	2014-01-19	23	0
CB	2014-01-19	24	0
CB	2014-01-19	26	0
CB	2014-01-19	27	0
KK	2014-01-20	1	0
KK	2014-01-20	2	0
KK	2014-01-20	3	0
KK	2014-01-20	4	0
KK	2014-01-20	7	0
KK	2014-01-20	8	0
KK	2014-01-20	10	0
KK	2014-01-20	12	0
KK	2014-01-20	14	0
KK	2014-01-22	9	0
KK	2014-01-22	15	0
KK	2014-01-22	16	0
KK	2014-01-22	17	0
KK	2014-01-22	20	0
KK	2014-01-22	21	0
KK	2014-01-22	23	0
KK	2014-01-22	24	0
KK	2014-01-22	26	0
KK	2014-01-22	27	0
CB	2014-01-23	1	0
CB	2014-01-23	2	0
CB	2014-01-23	3	0
CB	2014-01-23	4	0
CB	2014-01-23	7	0
CB	2014-01-23	8	0
CB	2014-01-23	10	0
RMS	2014-01-23	11	0
CB	2014-01-23	12	0
CB	2014-01-23	14	0
CB	2014-01-23	30	0
RMS	2014-01-24	11	0
KK	2014-01-27	1	0
KK	2014-01-27	2	0
KK	2014-01-27	3	0
KK	2014-01-27	4	0
KK	2014-01-27	7	0
KK	2014-01-27	8	0
KK	2014-01-27	10	0
RMS	2014-01-27	11	0
KK	2014-01-27	12	0
KK	2014-01-27	14	0
CB	2014-01-28	9	0
CB	2014-01-28	15	0
CB	2014-01-28	16	0
CB	2014-01-28	17	0
CB	2014-01-28	20	0
CB	2014-01-28	21	0
CB	2014-01-28	23	0
CB	2014-01-28	24	0
CB	2014-01-28	26	0
CB	2014-01-28	27	0
RMS	2014-01-31	11	0
KK	2014-02-03	1	1
KK	2014-02-03	2	0
KK	2014-02-03	3	0
KK	2014-02-03	4	0
KK	2014-02-03	7	0
KK	2014-02-03	8	0
KK	2014-02-03	10	0
RMS	2014-02-03	11	0
KK	2014-02-03	12	0
KK	2014-02-03	14	0
CB	2014-02-04	9	0
RMS	2014-02-04	11	0
CB	2014-02-04	15	0
CB	2014-02-04	16	0
CB	2014-02-04	17	0
CB	2014-02-04	20	0
CB	2014-02-04	21	0
CB	2014-02-04	23	0
CB	2014-02-04	24	0
CB	2014-02-04	26	0
CB	2014-02-04	27	0
KK	2014-02-05	9	0
KK	2014-02-05	15	0
KK	2014-02-05	16	0
KK	2014-02-05	17	0
KK	2014-02-05	20	0
KK	2014-02-05	21	0
KK	2014-02-05	23	0
KK	2014-02-05	24	0
KK	2014-02-05	26	0
KK	2014-02-05	27	0
CB	2014-02-06	9	0
CB	2014-02-06	15	0
CB	2014-02-06	16	0
CB	2014-02-06	17	0
CB	2014-02-06	20	0
CB	2014-02-06	21	0
CB	2014-02-06	23	0
CB	2014-02-06	24	0
CB	2014-02-06	26	0
CB	2014-02-06	27	0
CB	2014-02-09	1	0
CB	2014-02-09	2	0
CB	2014-02-09	3	0
CB	2014-02-09	4	0
CB	2014-02-09	7	0
CB	2014-02-09	8	0
CB	2014-02-09	10	0
CB	2014-02-09	12	0
CB	2014-02-09	14	0
CB	2014-02-09	30	0
KK	2014-02-10	1	0
KK	2014-02-10	2	0
KK	2014-02-10	3	0
KK	2014-02-10	4	0
KK	2014-02-10	7	0
KK	2014-02-10	8	0
KK	2014-02-10	10	0
RMS	2014-02-10	11	0
KK	2014-02-10	12	0
KK	2014-02-10	14	0
CB	2014-02-11	9	0
CB	2014-02-11	15	0
CB	2014-02-11	16	0
CB	2014-02-11	17	0
CB	2014-02-11	20	0
CB	2014-02-11	21	0
CB	2014-02-11	23	0
CB	2014-02-11	24	0
CB	2014-02-11	26	0
CB	2014-02-11	27	0
KK	2014-02-17	1	0
KK	2014-02-17	2	0
KK	2014-02-17	3	0
KK	2014-02-17	4	0
KK	2014-02-17	7	0
KK	2014-02-17	8	0
KK	2014-02-17	10	0
KK	2014-02-17	12	0
KK	2014-02-17	14	0
KK	2014-02-19	9	0
KK	2014-02-19	15	0
KK	2014-02-19	16	0
KK	2014-02-19	17	0
KK	2014-02-19	20	0
KK	2014-02-19	21	0
KK	2014-02-19	23	0
KK	2014-02-19	24	0
KK	2014-02-19	26	0
KK	2014-02-19	27	0
CB	2014-02-20	1	0
CB	2014-02-20	2	0
CB	2014-02-20	3	0
CB	2014-02-20	4	0
CB	2014-02-20	7	1
CB	2014-02-20	8	0
CB	2014-02-20	10	0
CB	2014-02-20	12	0
CB	2014-02-20	14	0
CB	2014-02-20	30	0
CB	2014-02-23	9	0
CB	2014-02-23	15	0
CB	2014-02-23	16	0
CB	2014-02-23	17	0
CB	2014-02-23	20	0
CB	2014-02-23	21	0
CB	2014-02-23	23	0
CB	2014-02-23	24	0
CB	2014-02-23	26	0
CB	2014-02-23	27	0
KK	2014-02-24	1	0
KK	2014-02-24	2	0
KK	2014-02-24	3	0
KK	2014-02-24	4	0
KK	2014-02-24	7	0
KK	2014-02-24	8	0
KK	2014-02-24	10	0
KK	2014-02-24	12	0
KK	2014-02-24	14	0
KK	2014-02-26	9	0
KK	2014-02-26	15	0
KK	2014-02-26	16	0
KK	2014-02-26	17	0
KK	2014-02-26	20	0
KK	2014-02-26	21	0
KK	2014-02-26	23	0
KK	2014-02-26	24	1
KK	2014-02-26	26	0
KK	2014-02-26	27	0
RMS	2014-02-28	11	0
CB	2014-03-04	9	0
CB	2014-03-04	15	0
CB	2014-03-04	16	0
CB	2014-03-04	17	0
CB	2014-03-04	20	0
CB	2014-03-04	21	0
CB	2014-03-04	23	0
CB	2014-03-04	24	0
CB	2014-03-04	26	0
CB	2014-03-07	1	0
CB	2014-03-07	2	0
CB	2014-03-07	3	0
CB	2014-03-07	4	0
CB	2014-03-07	7	0
CB	2014-03-07	8	0
CB	2014-03-07	10	0
RMS	2014-03-07	11	0
CB	2014-03-07	12	0
CB	2014-03-07	14	0
CB	2014-03-07	30	0
KK	2014-03-10	1	0
KK	2014-03-10	2	0
KK	2014-03-10	3	0
KK	2014-03-10	4	0
KK	2014-03-10	7	0
KK	2014-03-10	8	0
KK	2014-03-10	10	0
KK	2014-03-10	12	0
KK	2014-03-10	14	0
CB	2014-03-11	9	0
RMS	2014-03-11	11	0
CB	2014-03-11	15	0
CB	2014-03-11	16	0
CB	2014-03-11	17	0
CB	2014-03-11	20	0
CB	2014-03-11	21	0
CB	2014-03-11	23	0
CB	2014-03-11	24	0
CB	2014-03-11	26	0
CB	2014-03-11	27	0
KK	2014-03-12	9	0
KK	2014-03-12	15	0
KK	2014-03-12	16	0
KK	2014-03-12	17	0
KK	2014-03-12	20	0
KK	2014-03-12	21	2
KK	2014-03-12	23	0
KK	2014-03-12	24	0
KK	2014-03-12	26	0
KK	2014-03-12	27	0
CB	2014-03-13	1	0
CB	2014-03-13	2	0
CB	2014-03-13	3	0
CB	2014-03-13	4	0
CB	2014-03-13	7	0
CB	2014-03-13	8	0
CB	2014-03-13	10	0
RMS	2014-03-13	11	0
CB	2014-03-13	12	0
CB	2014-03-13	14	0
CB	2014-03-13	30	0
CB	2014-03-16	15	0
CB	2014-03-16	16	0
CB	2014-03-16	17	0
CB	2014-03-16	20	0
CB	2014-03-16	21	1
CB	2014-03-16	26	0
KK	2014-03-17	1	0
KK	2014-03-17	2	0
KK	2014-03-17	3	0
KK	2014-03-17	4	0
KK	2014-03-17	7	0
KK	2014-03-17	8	0
KK	2014-03-17	10	0
KK	2014-03-17	12	0
KK	2014-03-17	14	0
CB	2014-03-18	1	1
CB	2014-03-18	2	0
CB	2014-03-18	3	0
CB	2014-03-18	4	0
CB	2014-03-18	7	0
CB	2014-03-18	8	0
CB	2014-03-18	12	0
CB	2014-03-18	14	0
CB	2014-03-18	30	0
KK	2014-03-19	9	0
RMS	2014-03-19	11	1
KK	2014-03-19	15	0
KK	2014-03-19	16	0
KK	2014-03-19	17	0
KK	2014-03-19	20	0
KK	2014-03-19	21	0
KK	2014-03-19	23	0
KK	2014-03-19	24	0
KK	2014-03-19	26	0
KK	2014-03-19	27	0
CB	2014-03-20	9	0
CB	2014-03-20	15	0
CB	2014-03-20	16	1
CB	2014-03-20	17	0
CB	2014-03-20	20	0
CB	2014-03-20	21	0
CB	2014-03-20	23	0
CB	2014-03-20	24	0
CB	2014-03-20	26	0
CB	2014-03-20	27	0
RMS	2014-03-21	11	0
CB	2014-03-23	1	0
CB	2014-03-23	2	0
CB	2014-03-23	3	0
CB	2014-03-23	4	0
CB	2014-03-23	7	0
CB	2014-03-23	8	0
CB	2014-03-23	10	0
CB	2014-03-23	12	0
CB	2014-03-23	14	0
CB	2014-03-23	30	0
KK	2014-03-24	1	2
KK	2014-03-24	2	0
KK	2014-03-24	3	0
KK	2014-03-24	4	1
KK	2014-03-24	7	0
KK	2014-03-24	8	0
KK	2014-03-24	10	0
RMS	2014-03-24	11	0
KK	2014-03-24	12	0
KK	2014-03-24	14	0
JM	2014-03-26	1	0
JM	2014-03-26	2	0
JM	2014-03-26	3	0
JM	2014-03-26	4	0
JM	2014-03-26	7	0
JM	2014-03-26	8	0
JM	2014-03-26	10	0
JM	2014-03-26	12	0
JM	2014-03-26	14	0
JM	2014-03-26	30	0
JM	2014-03-26	31	0
CB	2014-03-27	9	0
CB	2014-03-27	15	0
CB	2014-03-27	16	0
CB	2014-03-27	17	0
CB	2014-03-27	20	0
CB	2014-03-27	21	0
CB	2014-03-27	23	0
CB	2014-03-27	24	0
CB	2014-03-27	26	0
CB	2014-03-27	27	0
CB	2014-03-30	1	0
CB	2014-03-30	2	0
CB	2014-03-30	3	0
CB	2014-03-30	4	0
CB	2014-03-30	7	0
CB	2014-03-30	8	0
CB	2014-03-30	10	0
CB	2014-03-30	12	0
CB	2014-03-30	14	0
CB	2014-03-30	30	0
KK	2014-03-31	1	0
KK	2014-03-31	2	1
KK	2014-03-31	3	0
KK	2014-03-31	4	0
KK	2014-03-31	7	0
KK	2014-03-31	8	0
JM	2014-03-31	9	0
KK	2014-03-31	10	0
RMS	2014-03-31	11	0
KK	2014-03-31	12	0
KK	2014-03-31	14	0
JM	2014-03-31	15	0
JM	2014-03-31	16	0
JM	2014-03-31	17	0
JM	2014-03-31	20	0
JM	2014-03-31	21	0
JM	2014-03-31	23	0
JM	2014-03-31	24	0
JM	2014-03-31	26	0
JM	2014-03-31	27	0
CB	2014-04-01	9	0
RMS	2014-04-01	11	0
CB	2014-04-01	15	0
CB	2014-04-01	16	0
CB	2014-04-01	17	0
CB	2014-04-01	20	0
CB	2014-04-01	21	0
CB	2014-04-01	23	0
CB	2014-04-01	24	0
CB	2014-04-01	26	0
CB	2014-04-01	27	0
KK	2014-04-02	9	0
KK	2014-04-02	15	0
KK	2014-04-02	16	0
KK	2014-04-02	17	0
KK	2014-04-02	20	0
KK	2014-04-02	21	1
KK	2014-04-02	23	0
KK	2014-04-02	24	0
KK	2014-04-02	26	0
KK	2014-04-02	27	0
CG	2014-04-03	1	0
CG	2014-04-03	2	0
CG	2014-04-03	3	0
CG	2014-04-03	4	0
CG	2014-04-03	7	1
CG	2014-04-03	8	0
CG	2014-04-03	10	0
RMS	2014-04-03	11	0
CG	2014-04-03	12	0
CG	2014-04-03	14	0
CG	2014-04-03	30	0
CA	2014-04-04	1	0
CA	2014-04-04	2	0
CA	2014-04-04	4	0
CA	2014-04-04	7	0
CG	2014-04-04	9	0
CA	2014-04-04	10	0
CG	2014-04-04	15	0
CG	2014-04-04	17	0
CG	2014-04-04	20	0
CG	2014-04-04	21	0
CG	2014-04-04	23	1
CG	2014-04-04	24	0
CG	2014-04-04	26	0
CG	2014-04-04	27	0
CB	2014-04-06	1	0
CB	2014-04-06	2	0
CB	2014-04-06	3	0
CB	2014-04-06	4	0
CB	2014-04-06	7	0
CB	2014-04-06	8	0
LS	2014-04-06	9	1
CB	2014-04-06	10	0
CB	2014-04-06	12	0
CB	2014-04-06	14	0
LS	2014-04-06	15	1
LS	2014-04-06	16	0
LS	2014-04-06	17	0
LS	2014-04-06	20	0
LS	2014-04-06	21	0
LS	2014-04-06	23	0
LS	2014-04-06	24	0
LS	2014-04-06	26	0
LS	2014-04-06	27	0
CB	2014-04-06	30	0
JM	2014-04-07	9	0
RMS	2014-04-07	11	0
JM	2014-04-07	15	0
JM	2014-04-07	16	0
JM	2014-04-07	17	0
JM	2014-04-07	20	0
JM	2014-04-07	21	0
JM	2014-04-07	23	0
JM	2014-04-07	24	0
JM	2014-04-07	26	0
JM	2014-04-07	27	0
CB	2014-04-08	9	0
CB	2014-04-08	15	1
CB	2014-04-08	16	0
CB	2014-04-08	17	0
CB	2014-04-08	20	0
CB	2014-04-08	21	0
CB	2014-04-08	23	0
CB	2014-04-08	24	0
CB	2014-04-08	26	0
CB	2014-04-08	27	0
JM	2014-04-09	1	0
JM	2014-04-09	2	0
JM	2014-04-09	3	0
JM	2014-04-09	4	0
JM	2014-04-09	7	0
JM	2014-04-09	8	0
JM	2014-04-09	10	0
JM	2014-04-09	12	0
JM	2014-04-09	14	0
JM	2014-04-09	30	0
JM	2014-04-09	31	0
CB	2014-04-10	1	0
CB	2014-04-10	2	0
CB	2014-04-10	3	0
CB	2014-04-10	4	0
CB	2014-04-10	7	0
CB	2014-04-10	8	0
CG	2014-04-10	9	0
CB	2014-04-10	10	0
CB	2014-04-10	12	0
CB	2014-04-10	14	0
CG	2014-04-10	15	0
CG	2014-04-10	16	0
CG	2014-04-10	17	0
CG	2014-04-10	20	0
CG	2014-04-10	21	0
CG	2014-04-10	23	0
CG	2014-04-10	24	0
CG	2014-04-10	26	0
CG	2014-04-10	27	0
CB	2014-04-10	30	0
CG	2014-04-11	1	0
CG	2014-04-11	2	0
CG	2014-04-11	3	0
CG	2014-04-11	4	0
CG	2014-04-11	7	0
CG	2014-04-11	8	0
CG	2014-04-11	10	0
CG	2014-04-11	12	0
CG	2014-04-11	14	0
CG	2014-04-11	30	0
KK	2014-04-14	1	1
KK	2014-04-14	2	0
KK	2014-04-14	3	0
KK	2014-04-14	4	1
KK	2014-04-14	7	0
KK	2014-04-14	8	0
JM	2014-04-14	9	0
KK	2014-04-14	10	0
KK	2014-04-14	12	0
KK	2014-04-14	14	0
JM	2014-04-14	15	0
JM	2014-04-14	16	0
JM	2014-04-14	17	0
JM	2014-04-14	20	0
JM	2014-04-14	21	0
JM	2014-04-14	23	0
JM	2014-04-14	24	0
JM	2014-04-14	26	0
JM	2014-04-14	27	0
JM	2014-04-14	31	0
CB	2014-04-15	1	0
CB	2014-04-15	2	0
CB	2014-04-15	3	0
CB	2014-04-15	4	0
CB	2014-04-15	7	0
CB	2014-04-15	8	0
CB	2014-04-15	10	0
CB	2014-04-15	12	1
CB	2014-04-15	14	0
CB	2014-04-15	30	0
JM	2014-04-16	9	0
KK	2014-04-16	9	0
JM	2014-04-16	15	0
KK	2014-04-16	15	0
JM	2014-04-16	16	0
KK	2014-04-16	16	1
JM	2014-04-16	17	0
KK	2014-04-16	17	0
JM	2014-04-16	20	0
KK	2014-04-16	20	0
JM	2014-04-16	21	0
KK	2014-04-16	21	0
JM	2014-04-16	23	0
KK	2014-04-16	23	0
JM	2014-04-16	24	0
KK	2014-04-16	24	0
JM	2014-04-16	26	0
KK	2014-04-16	26	0
JM	2014-04-16	27	0
KK	2014-04-16	27	0
CG	2014-04-17	1	0
CG	2014-04-17	2	0
CG	2014-04-17	3	0
CG	2014-04-17	4	0
CG	2014-04-17	7	0
CG	2014-04-17	8	0
CB	2014-04-17	9	1
CG	2014-04-17	10	0
CG	2014-04-17	12	0
CG	2014-04-17	14	0
CB	2014-04-17	15	0
CB	2014-04-17	16	0
CB	2014-04-17	17	0
CB	2014-04-17	20	0
CB	2014-04-17	21	1
CB	2014-04-17	23	0
CB	2014-04-17	24	0
CB	2014-04-17	26	0
CB	2014-04-17	27	0
CG	2014-04-17	30	0
CA	2014-04-18	1	0
CA	2014-04-18	2	0
CA	2014-04-18	3	0
CA	2014-04-18	4	1
CA	2014-04-18	7	0
CA	2014-04-18	8	0
CG	2014-04-18	9	0
CA	2014-04-18	10	0
CA	2014-04-18	12	0
CA	2014-04-18	14	0
CG	2014-04-18	15	0
CG	2014-04-18	16	0
CG	2014-04-18	17	0
CG	2014-04-18	21	1
CG	2014-04-18	21	0
CG	2014-04-18	23	0
CG	2014-04-18	24	0
CG	2014-04-18	26	0
CG	2014-04-18	27	0
KK	2014-04-21	1	0
KK	2014-04-21	2	0
KK	2014-04-21	3	0
KK	2014-04-21	4	0
KK	2014-04-21	7	0
KK	2014-04-21	8	0
KK	2014-04-21	10	0
RMS	2014-04-21	11	1
KK	2014-04-21	12	0
KK	2014-04-21	14	0
CB	2014-04-22	9	0
RMS	2014-04-22	11	0
CB	2014-04-22	15	1
CB	2014-04-22	16	0
CB	2014-04-22	17	0
CB	2014-04-22	20	1
CB	2014-04-22	21	0
CB	2014-04-22	23	0
CB	2014-04-22	24	0
CB	2014-04-22	26	0
CB	2014-04-22	27	0
JM	2014-04-23	1	0
JM	2014-04-23	2	0
JM	2014-04-23	3	0
JM	2014-04-23	4	0
JM	2014-04-23	7	0
JM	2014-04-23	8	0
JM	2014-04-23	10	0
RMS	2014-04-23	11	1
JM	2014-04-23	12	0
JM	2014-04-23	14	0
JM	2014-04-23	30	0
JM	2014-04-23	31	0
CG	2014-04-24	9	0
CG	2014-04-24	15	0
CG	2014-04-24	16	0
CG	2014-04-24	17	0
CG	2014-04-24	20	0
CG	2014-04-24	21	0
CG	2014-04-24	23	0
CG	2014-04-24	24	0
CG	2014-04-24	26	0
CG	2014-04-24	27	0
CG	2014-04-25	1	0
CG	2014-04-25	2	0
CG	2014-04-25	3	0
CG	2014-04-25	4	0
CG	2014-04-25	7	0
CG	2014-04-25	8	0
CG	2014-04-25	10	0
RMS	2014-04-25	11	1
CG	2014-04-25	12	0
CG	2014-04-25	14	0
CG	2014-04-25	30	0
RMS	2014-04-26	11	1
KK	2014-04-28	1	1
KK	2014-04-28	2	0
KK	2014-04-28	3	0
KK	2014-04-28	4	0
KK	2014-04-28	7	0
KK	2014-04-28	8	0
JM	2014-04-28	9	0
KK	2014-04-28	10	0
KK	2014-04-28	12	1
KK	2014-04-28	14	1
JM	2014-04-28	15	0
JM	2014-04-28	16	0
JM	2014-04-28	17	0
JM	2014-04-28	20	0
JM	2014-04-28	21	0
JM	2014-04-28	23	0
JM	2014-04-28	24	0
JM	2014-04-28	26	0
JM	2014-04-28	27	0
CB	2014-04-29	1	0
CB	2014-04-29	2	1
CB	2014-04-29	3	0
CB	2014-04-29	4	1
CB	2014-04-29	7	0
CB	2014-04-29	8	0
CB	2014-04-29	10	0
CB	2014-04-29	12	0
CB	2014-04-29	14	0
CB	2014-04-29	30	0
JM	2014-04-30	1	0
JM	2014-04-30	2	0
JM	2014-04-30	3	0
JM	2014-04-30	4	0
JM	2014-04-30	7	0
JM	2014-04-30	8	0
JM	2014-04-30	10	0
RMS	2014-04-30	11	0
JM	2014-04-30	12	0
JM	2014-04-30	14	0
JM	2014-04-30	30	0
JM	2014-04-30	31	0
CB	2014-05-01	9	0
RMS	2014-05-01	11	1
CB	2014-05-01	15	0
CB	2014-05-01	16	1
CB	2014-05-01	17	1
CB	2014-05-01	20	0
CB	2014-05-01	21	0
CB	2014-05-01	23	0
CB	2014-05-01	24	0
CB	2014-05-01	26	0
CB	2014-05-01	27	0
JM	2014-05-05	9	0
JM	2014-05-05	15	0
JM	2014-05-05	16	0
JM	2014-05-05	17	0
JM	2014-05-05	20	1
JM	2014-05-05	21	1
JM	2014-05-05	23	0
JM	2014-05-05	24	1
JM	2014-05-05	26	0
JM	2014-05-05	27	1
CB	2014-05-06	9	0
CB	2014-05-06	15	0
CB	2014-05-06	16	0
CB	2014-05-06	17	0
CB	2014-05-06	20	0
CB	2014-05-06	21	0
CB	2014-05-06	23	0
CB	2014-05-06	24	0
CB	2014-05-06	26	0
CB	2014-05-06	27	0
KK	2014-05-07	9	0
KK	2014-05-07	15	1
KK	2014-05-07	16	1
KK	2014-05-07	17	0
KK	2014-05-07	20	0
KK	2014-05-07	21	0
KK	2014-05-07	23	0
KK	2014-05-07	24	1
KK	2014-05-07	26	0
KK	2014-05-07	27	0
CB	2014-05-08	1	0
CB	2014-05-08	2	0
CB	2014-05-08	3	0
CB	2014-05-08	4	0
CB	2014-05-08	7	1
CB	2014-05-08	8	0
CB	2014-05-08	10	0
CB	2014-05-08	12	1
CB	2014-05-08	14	1
CB	2014-05-08	30	0
CG	2014-05-09	1	1
CG	2014-05-09	12	1
CB	2014-05-13	1	0
CB	2014-05-13	2	0
CB	2014-05-13	3	0
CB	2014-05-13	4	0
CB	2014-05-13	7	0
CB	2014-05-13	8	0
CB	2014-05-13	10	0
CB	2014-05-13	12	0
CB	2014-05-13	14	0
CB	2014-05-13	30	0
CB	2014-05-14	9	0
KK	2014-05-14	9	0
CB	2014-05-14	15	0
KK	2014-05-14	15	1
CB	2014-05-14	16	0
KK	2014-05-14	16	0
CB	2014-05-14	17	0
KK	2014-05-14	17	0
CB	2014-05-14	20	1
KK	2014-05-14	20	0
CB	2014-05-14	21	0
KK	2014-05-14	21	0
CB	2014-05-14	23	0
KK	2014-05-14	23	0
CB	2014-05-14	24	0
KK	2014-05-14	24	0
CB	2014-05-14	26	0
KK	2014-05-14	26	0
CB	2014-05-14	27	0
KK	2014-05-14	27	0
KK	2014-05-19	1	1
KK	2014-05-19	2	0
KK	2014-05-19	3	0
KK	2014-05-19	4	0
KK	2014-05-19	7	0
KK	2014-05-19	8	0
KK	2014-05-19	10	1
RMS	2014-05-19	11	1
KK	2014-05-19	12	1
KK	2014-05-19	14	0
KK	2014-05-21	9	1
KK	2014-05-21	15	0
KK	2014-05-21	16	0
KK	2014-05-21	17	0
KK	2014-05-21	20	1
KK	2014-05-21	21	0
KK	2014-05-21	23	0
KK	2014-05-21	24	0
KK	2014-05-21	26	0
KK	2014-05-21	27	0
RMS	2014-05-22	11	0
RMS	2014-05-23	11	0
RMS	2014-05-23	15	0
RMS	2014-05-23	16	0
RMS	2014-05-23	20	0
RMS	2014-05-23	21	0
KK	2014-05-26	1	0
KK	2014-05-26	2	0
KK	2014-05-26	3	0
KK	2014-05-26	4	0
KK	2014-05-26	7	0
KK	2014-05-26	8	0
KK	2014-05-26	10	1
KK	2014-05-26	12	0
KK	2014-05-26	14	0
RMS	2014-05-27	11	0
CB	2014-05-29	1	0
CB	2014-05-29	2	0
CB	2014-05-29	3	0
CB	2014-05-29	4	0
CB	2014-05-29	7	0
CB	2014-05-29	8	0
CB	2014-05-29	10	0
CB	2014-05-29	12	2
CB	2014-05-29	14	2
CB	2014-05-29	30	2
KK	2014-06-02	1	0
KK	2014-06-02	2	0
KK	2014-06-02	3	0
KK	2014-06-02	4	0
KK	2014-06-02	7	0
KK	2014-06-02	8	0
KK	2014-06-02	10	0
KK	2014-06-02	12	1
KK	2014-06-02	14	1
KK	2014-06-02	30	0
KK	2014-06-04	9	0
KK	2014-06-04	15	0
KK	2014-06-04	16	0
KK	2014-06-04	17	0
KK	2014-06-04	20	1
KK	2014-06-04	21	0
KK	2014-06-04	23	0
KK	2014-06-04	24	1
KK	2014-06-04	26	0
KK	2014-06-04	27	0
KK	2014-06-09	1	0
KK	2014-06-09	2	0
KK	2014-06-09	3	0
KK	2014-06-09	4	0
KK	2014-06-09	7	0
KK	2014-06-09	8	0
KK	2014-06-09	10	0
KK	2014-06-09	12	0
KK	2014-06-09	14	0
KK	2014-06-09	30	0
KK	2014-06-11	9	0
KK	2014-06-11	15	0
KK	2014-06-11	16	0
KK	2014-06-11	17	0
KK	2014-06-11	20	0
KK	2014-06-11	21	0
KK	2014-06-11	23	0
KK	2014-06-11	24	0
KK	2014-06-11	26	0
KK	2014-06-11	27	0
CB	2014-06-15	9	1
CB	2014-06-15	15	0
CB	2014-06-15	16	0
CB	2014-06-15	17	0
CB	2014-06-15	20	1
CB	2014-06-15	21	0
CB	2014-06-15	23	0
CB	2014-06-15	24	0
CB	2014-06-15	26	0
CB	2014-06-15	27	0
KK	2014-06-16	1	0
KK	2014-06-16	2	0
KK	2014-06-16	3	0
KK	2014-06-16	4	0
KK	2014-06-16	7	0
KK	2014-06-16	8	0
KK	2014-06-16	10	0
KK	2014-06-16	12	0
KK	2014-06-16	14	0
KK	2014-06-16	30	0
KK	2014-06-18	9	0
KK	2014-06-18	15	0
KK	2014-06-18	16	0
KK	2014-06-18	17	0
KK	2014-06-18	20	0
KK	2014-06-18	21	0
KK	2014-06-18	23	0
KK	2014-06-18	24	0
KK	2014-06-18	26	0
KK	2014-06-18	27	0
KK	2014-06-23	1	0
KK	2014-06-23	2	0
KK	2014-06-23	3	0
KK	2014-06-23	4	0
KK	2014-06-23	7	0
KK	2014-06-23	8	0
KK	2014-06-23	10	0
KK	2014-06-23	12	0
KK	2014-06-23	14	0
KK	2014-06-23	30	0
KK	2014-06-25	9	0
KK	2014-06-25	15	0
KK	2014-06-25	16	0
KK	2014-06-25	17	0
KK	2014-06-25	20	1
KK	2014-06-25	21	0
KK	2014-06-25	23	0
KK	2014-06-25	24	0
KK	2014-06-25	26	0
KK	2014-06-25	27	1
KK	2014-06-30	1	0
KK	2014-06-30	2	0
KK	2014-06-30	3	0
KK	2014-06-30	4	0
KK	2014-06-30	7	0
KK	2014-06-30	8	0
KK	2014-06-30	10	0
KK	2014-06-30	12	0
KK	2014-06-30	14	0
KK	2014-06-30	30	0
RMS	2014-07-02	1	1
RMS	2014-07-02	7	0
KK	2014-07-02	9	0
RMS	2014-07-02	10	0
RMS	2014-07-02	11	0
RMS	2014-07-02	12	2
KK	2014-07-02	15	0
KK	2014-07-02	16	1
KK	2014-07-02	17	0
KK	2014-07-02	20	0
KK	2014-07-02	21	0
KK	2014-07-02	23	0
KK	2014-07-02	24	0
KK	2014-07-02	26	0
KK	2014-07-02	27	0
RMS	2014-07-03	2	0
RMS	2014-07-03	3	0
RMS	2014-07-03	4	0
RMS	2014-07-03	8	0
RMS	2014-07-03	11	0
RMS	2014-07-03	14	0
RMS	2014-07-03	27	0
RMS	2014-07-03	30	0
KK	2014-07-07	1	0
KK	2014-07-07	2	1
KK	2014-07-07	3	1
KK	2014-07-07	4	0
KK	2014-07-07	7	0
KK	2014-07-07	8	0
KK	2014-07-07	10	1
KK	2014-07-07	12	1
KK	2014-07-07	14	1
KK	2014-07-07	30	0
CB	2014-07-13	1	0
CB	2014-07-13	2	0
CB	2014-07-13	3	1
CB	2014-07-13	4	1
CB	2014-07-13	7	0
CB	2014-07-13	8	0
CB	2014-07-13	10	1
CB	2014-07-13	12	0
CB	2014-07-13	14	0
CB	2014-07-13	30	0
KK	2014-07-14	1	0
KK	2014-07-14	2	1
KK	2014-07-14	3	0
KK	2014-07-14	4	0
KK	2014-07-14	7	0
KK	2014-07-14	8	0
KK	2014-07-14	10	0
KK	2014-07-14	12	0
KK	2014-07-14	14	0
KK	2014-07-14	30	1
KK	2014-07-16	9	0
KK	2014-07-16	15	1
KK	2014-07-16	16	0
KK	2014-07-16	17	2
KK	2014-07-16	20	0
KK	2014-07-16	21	0
KK	2014-07-16	23	0
KK	2014-07-16	24	0
KK	2014-07-16	26	0
KK	2014-07-16	27	0
RMS	2014-07-17	11	1
RMS	2014-07-17	12	0
RMS	2014-07-18	11	1
KK	2014-07-21	1	0
KK	2014-07-21	2	0
KK	2014-07-21	3	0
KK	2014-07-21	4	0
KK	2014-07-21	7	0
KK	2014-07-21	8	0
KK	2014-07-21	10	0
RMS	2014-07-21	11	0
KK	2014-07-21	12	0
KK	2014-07-21	14	0
RMS	2014-07-21	15	2
RMS	2014-07-21	16	1
RMS	2014-07-21	24	0
RMS	2014-07-21	27	0
KK	2014-07-21	30	0
RMS	2014-07-22	11	0
KK	2014-07-23	9	0
KK	2014-07-23	15	0
KK	2014-07-23	16	0
KK	2014-07-23	17	0
KK	2014-07-23	20	0
KK	2014-07-23	21	1
KK	2014-07-23	23	0
KK	2014-07-23	24	0
KK	2014-07-23	26	0
KK	2014-07-23	27	0
KK	2014-07-28	1	0
KK	2014-07-28	2	0
KK	2014-07-28	3	1
KK	2014-07-28	4	0
KK	2014-07-28	7	0
KK	2014-07-28	8	0
KK	2014-07-28	10	0
KK	2014-07-28	12	0
KK	2014-07-28	14	0
KK	2014-07-28	30	1
RMS	2014-07-29	11	0
RMS	2014-07-30	1	0
RMS	2014-07-30	2	0
RMS	2014-07-30	4	0
RMS	2014-07-30	7	0
KK	2014-07-30	9	1
RMS	2014-07-30	11	1
RMS	2014-07-30	14	1
KK	2014-07-30	15	0
KK	2014-07-30	16	0
KK	2014-07-30	17	0
KK	2014-07-30	20	0
KK	2014-07-30	21	0
KK	2014-07-30	23	0
KK	2014-07-30	24	0
KK	2014-07-30	26	1
KK	2014-07-30	27	0
RMS	2014-08-01	11	0
RMS	2014-08-01	12	1
KK	2014-08-04	1	0
KK	2014-08-04	2	0
KK	2014-08-04	3	2
KK	2014-08-04	4	0
KK	2014-08-04	7	1
KK	2014-08-04	8	0
KK	2014-08-04	10	0
RMS	2014-08-04	11	0
KK	2014-08-04	12	1
KK	2014-08-04	14	0
KK	2014-08-04	30	0
RMS	2014-08-05	11	0
KK	2014-08-06	9	0
KK	2014-08-06	15	1
KK	2014-08-06	16	0
KK	2014-08-06	17	0
KK	2014-08-06	20	0
KK	2014-08-06	21	0
KK	2014-08-06	23	0
KK	2014-08-06	24	0
KK	2014-08-06	26	0
KK	2014-08-06	27	1
KK	2014-08-13	9	0
RMS	2014-08-13	11	0
KK	2014-08-13	15	0
KK	2014-08-13	16	0
KK	2014-08-13	17	0
KK	2014-08-13	20	0
KK	2014-08-13	21	0
KK	2014-08-13	23	0
KK	2014-08-13	24	0
KK	2014-08-13	26	0
KK	2014-08-13	27	0
KK	2014-08-20	9	0
KK	2014-08-20	15	0
KK	2014-08-20	16	0
KK	2014-08-20	17	1
KK	2014-08-20	20	0
KK	2014-08-20	21	0
KK	2014-08-20	23	0
KK	2014-08-20	24	1
KK	2014-08-20	26	0
KK	2014-08-20	27	0
RMS	2014-08-21	11	0
KK	2014-08-25	1	0
KK	2014-08-25	2	1
KK	2014-08-25	3	1
KK	2014-08-25	4	0
KK	2014-08-25	7	0
KK	2014-08-25	8	0
KK	2014-08-25	10	0
RMS	2014-08-25	11	0
KK	2014-08-25	12	0
KK	2014-08-25	14	0
RMS	2014-08-25	23	0
RMS	2014-08-25	24	0
KK	2014-08-25	30	0
RMS	2014-08-26	11	0
RMS	2014-08-26	15	1
RMS	2014-08-26	16	0
KK	2014-08-27	9	0
RMS	2014-08-27	11	0
KK	2014-08-27	15	0
KK	2014-08-27	16	0
KK	2014-08-27	17	0
KK	2014-08-27	20	0
KK	2014-08-27	21	0
KK	2014-08-27	23	0
KK	2014-08-27	24	0
KK	2014-08-27	26	0
KK	2014-08-27	27	0
RMS	2014-08-29	11	0
KK	2014-09-01	1	0
KK	2014-09-01	2	0
KK	2014-09-01	3	0
KK	2014-09-01	4	0
KK	2014-09-01	7	0
KK	2014-09-01	8	0
KK	2014-09-01	10	0
KK	2014-09-01	12	0
KK	2014-09-01	14	0
KK	2014-09-01	30	0
RMS	2014-09-02	11	0
KK	2014-09-03	9	0
RMS	2014-09-03	11	0
KK	2014-09-03	15	0
KK	2014-09-03	16	1
KK	2014-09-03	17	0
KK	2014-09-03	20	0
KK	2014-09-03	21	0
KK	2014-09-03	23	0
KK	2014-09-03	24	0
KK	2014-09-03	26	1
KK	2014-09-03	27	0
RMS	2014-09-05	1	0
RMS	2014-09-05	2	0
RMS	2014-09-05	3	0
RMS	2014-09-05	4	0
RMS	2014-09-05	7	0
RMS	2014-09-05	10	0
RMS	2014-09-05	11	0
RMS	2014-09-05	12	0
RMS	2014-09-05	14	0
CG	2014-09-07	1	1
CG	2014-09-07	2	0
CG	2014-09-07	3	0
CG	2014-09-07	4	0
CG	2014-09-07	7	0
CG	2014-09-07	8	0
CG	2014-09-07	10	0
CG	2014-09-07	12	0
CG	2014-09-07	14	0
CG	2014-09-07	30	0
CG	2014-09-08	9	0
CG	2014-09-08	15	0
CG	2014-09-08	16	0
CG	2014-09-08	17	0
CG	2014-09-08	20	0
CG	2014-09-08	21	0
CG	2014-09-08	23	0
CG	2014-09-08	24	0
CG	2014-09-08	26	0
CG	2014-09-08	27	0
RMS	2014-09-09	11	0
KK	2014-09-10	9	0
KK	2014-09-10	15	0
KK	2014-09-10	16	0
KK	2014-09-10	17	0
KK	2014-09-10	20	0
KK	2014-09-10	21	0
KK	2014-09-10	23	0
KK	2014-09-10	24	0
KK	2014-09-10	26	0
KK	2014-09-10	27	0
eh	2014-09-11	24	0
CG	2014-09-14	1	0
CG	2014-09-14	2	0
CG	2014-09-14	3	0
CG	2014-09-14	4	0
CG	2014-09-14	7	0
CG	2014-09-14	8	0
CG	2014-09-14	10	0
RMS	2014-09-14	11	1
CG	2014-09-14	12	0
CG	2014-09-14	14	0
CG	2014-09-14	30	0
KK	2014-09-15	1	0
KK	2014-09-15	2	0
KK	2014-09-15	3	0
KK	2014-09-15	4	0
KK	2014-09-15	7	0
KK	2014-09-15	8	0
CG	2014-09-15	9	0
KK	2014-09-15	10	0
KK	2014-09-15	12	1
KK	2014-09-15	14	0
CG	2014-09-15	15	0
CG	2014-09-15	16	0
CG	2014-09-15	17	0
CG	2014-09-15	20	2
CG	2014-09-15	21	0
CG	2014-09-15	23	0
CG	2014-09-15	24	0
CG	2014-09-15	26	0
CG	2014-09-15	27	1
KK	2014-09-15	30	0
RMS	2014-09-16	11	2
smh	2014-09-16	24	0
RMS	2014-09-17	1	0
RMS	2014-09-17	2	0
RMS	2014-09-17	4	0
RMS	2014-09-17	7	0
KK	2014-09-17	9	0
RMS	2014-09-17	10	1
RMS	2014-09-17	11	0
RMS	2014-09-17	12	1
KK	2014-09-17	15	0
KK	2014-09-17	16	0
KK	2014-09-17	17	0
KK	2014-09-17	20	0
KK	2014-09-17	21	0
KK	2014-09-17	23	1
KK	2014-09-17	24	0
KK	2014-09-17	26	0
KK	2014-09-17	27	1
RMS	2014-09-18	3	0
RMS	2014-09-18	11	1
RMS	2014-09-18	14	1
eh	2014-09-18	24	0
RMS	2014-09-19	1	0
RMS	2014-09-19	2	1
RMS	2014-09-19	3	0
RMS	2014-09-19	4	0
RMS	2014-09-19	7	0
RMS	2014-09-19	10	0
RMS	2014-09-19	11	2
RMS	2014-09-19	12	0
RMS	2014-09-19	14	1
RMS	2014-09-19	15	0
RMS	2014-09-19	16	0
RMS	2014-09-19	27	0
CG	2014-09-21	1	1
CG	2014-09-21	2	0
CG	2014-09-21	3	0
CG	2014-09-21	4	0
CG	2014-09-21	7	0
CG	2014-09-21	8	0
CB	2014-09-21	9	1
CG	2014-09-21	10	0
CG	2014-09-21	12	0
CG	2014-09-21	14	0
CB	2014-09-21	15	0
CB	2014-09-21	16	2
CB	2014-09-21	17	1
CB	2014-09-21	20	1
CB	2014-09-21	21	0
CB	2014-09-21	23	0
CB	2014-09-21	24	0
CB	2014-09-21	26	0
CB	2014-09-21	27	0
CG	2014-09-21	30	0
KK	2014-09-22	1	1
KK	2014-09-22	2	0
KK	2014-09-22	3	0
KK	2014-09-22	4	0
KK	2014-09-22	7	0
KK	2014-09-22	8	0
CG	2014-09-22	9	0
KK	2014-09-22	10	0
KK	2014-09-22	12	1
KK	2014-09-22	14	0
CG	2014-09-22	15	0
CG	2014-09-22	16	0
CG	2014-09-22	17	0
CG	2014-09-22	20	0
CG	2014-09-22	21	0
CG	2014-09-22	23	0
CG	2014-09-22	24	0
CG	2014-09-22	26	0
CG	2014-09-22	27	0
KK	2014-09-22	30	1
RMS	2014-09-24	2	1
KK	2014-09-24	9	0
KK	2014-09-24	15	1
KK	2014-09-24	16	1
KK	2014-09-24	17	0
KK	2014-09-24	20	1
KK	2014-09-24	21	0
KK	2014-09-24	23	0
KK	2014-09-24	24	0
KK	2014-09-24	26	0
KK	2014-09-24	27	0
RMS	2014-09-26	12	1
CG	2014-09-28	1	0
CG	2014-09-28	2	0
CG	2014-09-28	3	1
CG	2014-09-28	4	0
CG	2014-09-28	7	0
CG	2014-09-28	8	0
CB	2014-09-28	9	0
CG	2014-09-28	10	0
CG	2014-09-28	12	2
CG	2014-09-28	14	0
CB	2014-09-28	15	0
CB	2014-09-28	16	0
CB	2014-09-28	17	0
CB	2014-09-28	20	0
CB	2014-09-28	21	0
CB	2014-09-28	23	0
CB	2014-09-28	24	0
CB	2014-09-28	26	0
CB	2014-09-28	27	0
CG	2014-09-28	30	0
KK	2014-09-29	1	0
KK	2014-09-29	2	0
KK	2014-09-29	3	0
KK	2014-09-29	4	0
KK	2014-09-29	7	0
KK	2014-09-29	8	0
CG	2014-09-29	9	0
KK	2014-09-29	10	0
RMS	2014-09-29	11	0
KK	2014-09-29	12	0
KK	2014-09-29	14	0
CG	2014-09-29	15	0
CG	2014-09-29	16	0
CG	2014-09-29	17	0
CG	2014-09-29	20	0
CG	2014-09-29	21	0
CG	2014-09-29	23	0
CG	2014-09-29	24	0
CG	2014-09-29	26	0
CG	2014-09-29	27	0
KK	2014-09-29	30	0
smh	2014-09-30	24	0
[truncated: 1,006 more rows]

## Sheet: Sheet2
Date (mm/dd/yy)	Year	Month	Building #				Date (mm/dd/yy)	Month
2013-10-19	2013	october	15				2013-10-19	october
2013-10-19	2013	october	16				2013-10-20	october
2013-10-19	2013	october	9				2013-10-22	october
2013-10-19	2013	october	20				2013-10-23	october
2013-10-19	2013	october	21				2013-10-24	october
2013-10-19	2013	october	26				2013-10-25	october
2013-10-19	2013	october	17				2013-10-26	october
2013-10-19	2013	october	3				2013-10-27	october
2013-10-19	2013	october	8				2013-10-28	october
2013-10-19	2013	october	14				2013-10-29	october
2013-10-19	2013	october	12				2013-10-30	october
2013-10-19	2013	october	10				2013-10-31	october
2013-10-19	2013	october	7				2013-11-01	november
2013-10-19	2013	october	1				2013-11-02	november
2013-10-19	2013	october	2				2013-11-03	november
2013-10-19	2013	october	4				2013-11-04	november
2013-10-19	2013	october	5				2013-11-05	november
2013-10-19	2013	october	30				2013-11-06	november
2013-10-20	2013	october	24				2013-11-07	november
2013-10-20	2013	october	27				2013-11-08	november
2013-10-20	2013	october	23				2013-11-09	november
2013-10-20	2013	october	9				2013-11-10	november
2013-10-20	2013	october	15				2013-11-11	november
2013-10-20	2013	october	16				2013-11-12	november
2013-10-20	2013	october	20				2013-11-13	november
2013-10-20	2013	october	21				2013-11-14	november
2013-10-20	2013	october	26				2013-11-15	november
2013-10-20	2013	october	17				2013-11-16	november
2013-10-20	2013	october	12				2013-11-17	november
2013-10-20	2013	october	7				2013-11-18	november
2013-10-20	2013	october	10				2013-11-19	november
2013-10-20	2013	october	2				2013-11-20	november
2013-10-20	2013	october	4				2013-11-21	november
2013-10-20	2013	october	5				2013-11-21	november
2013-10-20	2013	october	3				2013-11-25	november
2013-10-20	2013	october	8				2013-12-02	december
2013-10-20	2013	october	14				2013-12-03	december
2013-10-22	2013	october	27				2013-12-04	december
2013-10-22	2013	october	24				2013-12-05	december
2013-10-22	2013	october	23				2013-12-09	december
2013-10-22	2013	october	17				2013-12-10	december
2013-10-22	2013	october	26				2013-12-11	december
2013-10-22	2013	october	x				2013-12-13	december
2013-10-22	2013	october	21				2013-12-15	december
2013-10-22	2013	october	3				2013-12-16	december
2013-10-22	2013	october	8				2013-12-17	december
2013-10-22	2013	october	14				2013-12-19	december
2013-10-22	2013	october	12				2014-01-02	january
2013-10-22	2013	october	10				2014-01-03	january
2013-10-22	2013	october	7				2014-01-06	january
2013-10-22	2013	october	2				2014-01-08	january
2013-10-22	2013	october	4				2014-01-09	january
2013-10-22	2013	october	1				2014-01-10	january
2013-10-22	2013	october	5				2014-01-12	january
2013-10-22	2013	october	30				2014-01-13	january
2013-10-23	2013	october	26				2014-01-14	january
2013-10-23	2013	october	17				2014-01-15	january
2013-10-23	2013	october	21				2014-01-16	january
2013-10-23	2013	october	20				2014-01-17	january
2013-10-23	2013	october	9				2014-01-19	january
2013-10-23	2013	october	16				2014-01-20	january
2013-10-23	2013	october	15				2014-01-22	january
2013-10-23	2013	october	23				2014-01-23	january
2013-10-23	2013	october	24				2014-01-24	january
2013-10-23	2013	october	27				2014-01-27	january
2013-10-23	2013	october	11				2014-01-28	january
2013-10-23	2013	october	8				2014-01-31	january
2013-10-23	2013	october	14				2014-02-03	february
2013-10-23	2013	october	3				2014-02-04	february
2013-10-23	2013	october	10				2014-02-05	february
2013-10-23	2013	october	12				2014-02-06	february
2013-10-23	2013	october	7				2014-02-09	february
2013-10-23	2013	october	4				2014-02-10	february
2013-10-23	2013	october	5				2014-02-11	february
2013-10-23	2013	october	1				2014-02-17	february
2013-10-23	2013	october	2				2014-02-19	february
2013-10-24	2013	october	26				2014-02-20	february
2013-10-24	2013	october	17				2014-02-23	february
2013-10-24	2013	october	9				2014-02-24	february
2013-10-24	2013	october	15				2014-02-26	february
2013-10-24	2013	october	16				2014-02-28	february
2013-10-24	2013	october	20				2014-03-04	march
2013-10-24	2013	october	21				2014-03-07	march
2013-10-24	2013	october	23				2014-03-10	march
2013-10-24	2013	october	24				2014-03-11	march
2013-10-24	2013	october	27				2014-03-12	march
2013-10-24	2013	october	2				2014-03-13	march
2013-10-24	2013	october	4				2014-03-16	march
2013-10-24	2013	october	5				2014-03-17	march
2013-10-24	2013	october	1				2014-03-19	march
2013-10-24	2013	october	10				2014-03-21	march
2013-10-24	2013	october	12				2014-03-24	march
2013-10-24	2013	october	7				2014-03-26	march
2013-10-24	2013	october	3				2014-03-27	march
2013-10-24	2013	october	8				2014-03-30	march
2013-10-24	2013	october	14				2014-03-31	march
2013-10-25	2013	october	17				2014-04-01	april
2013-10-25	2013	october	26				2014-04-02	april
2013-10-25	2013	october	20				2014-04-03	april
2013-10-25	2013	october	21				2014-04-04	april
2013-10-25	2013	october	9				2014-04-06	april
2013-10-25	2013	october	15				2014-04-07	april
2013-10-25	2013	october	16				2014-04-08	april
2013-10-25	2013	october	21				2014-04-09	april
2013-10-25	2013	october	20				2014-04-10	april
2013-10-25	2013	october	17				2014-04-11	april
2013-10-25	2013	october	26				2014-04-14	april
2013-10-25	2013	october	9				2014-04-15	april
2013-10-25	2013	october	15				2014-04-16	april
2013-10-25	2013	october	16				2014-04-17	april
2013-10-25	2013	october	24				2014-04-18	april
2013-10-25	2013	october	23				2014-04-21	april
2013-10-25	2013	october	27				2014-04-22	april
2013-10-26	2013	october	8				2014-04-23	april
2013-10-26	2013	october	14				2014-04-24	april
2013-10-26	2013	october	3				2014-04-25	april
2013-10-26	2013	october	12				2014-04-26	april
2013-10-26	2013	october	10				2014-04-28	april
2013-10-26	2013	october	7				2014-04-29	april
2013-10-26	2013	october	1				2014-04-30	april
2013-10-26	2013	october	2				2014-05-01	may
2013-10-26	2013	october	4				2014-05-05	may
2013-10-26	2013	october	5				2014-05-06	may
2013-10-27	2013	october	17				2014-05-07	may
2013-10-27	2013	october	26				2014-05-08	may
2013-10-27	2013	october	20				2014-05-11	may
2013-10-27	2013	october	21				2014-05-13	may
2013-10-27	2013	october	9				2014-05-14	may
2013-10-27	2013	october	15				2014-05-19	may
2013-10-27	2013	october	16				2014-05-21	may
2013-10-27	2013	october	24				2014-05-22	may
2013-10-27	2013	october	23				2014-05-23	may
2013-10-27	2013	october	27				2014-05-26	may
2013-10-28	2013	october	9				2014-05-27	may
2013-10-28	2013	october	x				2014-05-29	may
2013-10-28	2013	october	15				2014-06-02	june
2013-10-28	2013	october	16				2014-06-04	june
2013-10-28	2013	october	20				2014-06-09	june
2013-10-28	2013	october	x				2014-06-11	june
2013-10-28	2013	october	x				2014-06-15	june
2013-10-28	2013	october	x				2014-06-16	june
2013-10-28	2013	october	21				2014-06-18	june
2013-10-28	2013	october	26				2014-06-23	june
2013-10-28	2013	october	11				2014-06-25	june
2013-10-28	2013	october	27				2014-06-30	june
2013-10-28	2013	october	24				2014-07-02	july
2013-10-28	2013	october	23				2014-07-03	july
2013-10-28	2013	october	17				2014-07-07	july
2013-10-29	2013	october	26				2014-07-13	july
2013-10-29	2013	october	17				2014-07-14	july
2013-10-29	2013	october	21				2014-07-16	july
2013-10-29	2013	october	20				2014-07-17	july
2013-10-29	2013	october	15				2014-07-18	july
2013-10-29	2013	october	16				2014-07-21	july
2013-10-29	2013	october	9				2014-07-22	july
2013-10-29	2013	october	23				2014-07-23	july
2013-10-29	2013	october	24				2014-07-28	july
2013-10-29	2013	october	27				2014-07-29	july
2013-10-29	2013	october	15				2014-07-30	july
2013-10-29	2013	october	x				2014-08-01	august
2013-10-29	2013	october	4				2014-08-04	august
2013-10-29	2013	october	2				2014-08-05	august
2013-10-29	2013	october	x				2014-08-06	august
2013-10-29	2013	october	x				2014-08-13	august
2013-10-29	2013	october	5				2014-08-20	august
2013-10-29	2013	october	1				2014-08-21	august
2013-10-29	2013	october	10				2014-08-25	august
2013-10-29	2013	october	7				2014-08-26	august
2013-10-29	2013	october	11				2014-08-27	august
2013-10-30	2013	october	30				2014-08-29	august
2013-10-30	2013	october	3				2014-09-01	september
2013-10-30	2013	october	14				2014-09-02	september
2013-10-30	2013	october	8				2014-09-03	september
2013-10-30	2013	october	12				2014-09-05	september
2013-10-30	2013	october	10				2014-09-07	september
2013-10-30	2013	october	7				2014-09-08	september
2013-10-30	2013	october	1				2014-09-09	september
2013-10-30	2013	october	2				2014-09-10	september
2013-10-30	2013	october	4				2014-09-11	september
2013-10-30	2013	october	5				2014-09-14	september
2013-10-31	2013	october	1				2014-09-15	september
2013-10-31	2013	october	2				2014-09-16	september
2013-10-31	2013	october	4				2014-09-17	september
2013-10-31	2013	october	5				2014-09-18	september
2013-10-31	2013	october	12				2014-09-19	september
2013-10-31	2013	october	7				2014-09-21	september
2013-10-31	2013	october	10				2014-09-22	september
2013-10-31	2013	october	8				2014-09-24	september
2013-10-31	2013	october	14				2014-09-26	september
2013-10-31	2013	october	3				2014-09-28	september
2013-10-31	2013	october	30				2014-09-29	september
2013-10-31	2013	october	15				2014-09-30	september
2013-10-31	2013	october	x				2014-10-01	october
2013-10-31	2013	october	x				2014-10-02	october
2013-10-31	2013	october	9				2014-10-03	october
2013-10-31	2013	october	x				2014-10-05	october
2013-10-31	2013	october	x				2014-10-07	october
2013-10-31	2013	october	x				2014-10-10	october
2013-10-31	2013	october	x				2014-10-13	october
2013-10-31	2013	october	24				2014-10-14	october
2013-10-31	2013	october	23				2014-10-15	october
2013-10-31	2013	october	27				2014-10-17	october
2013-10-31	2013	october	17				2014-10-19	october
2013-10-31	2013	october	20				2014-10-20	october
2013-10-31	2013	october	21				2014-10-21	october
2013-10-31	2013	october	26				2014-10-22	october
2013-11-01	2013	november	8				2014-10-23	october
2013-11-01	2013	november	14				2014-10-24	october
2013-11-01	2013	november	3				2014-10-28	october
2013-11-01	2013	november	12				2014-10-29	october
2013-11-01	2013	november	7				2014-10-30	october
2013-11-01	2013	november	10				2014-10-31	october
2013-11-01	2013	november	1				2014-11-03	november
2013-11-01	2013	november	2				2014-11-04	november
2013-11-01	2013	november	4				2014-11-05	november
2013-11-01	2013	november	5				2014-11-07	november
2013-11-01	2013	november	11				2014-11-09	november
2013-11-02	2013	november	17				2014-11-10	november
2013-11-02	2013	november	26				2014-11-11	november
2013-11-02	2013	november	20				2014-11-12	november
2013-11-02	2013	november	21				2014-11-13	november
2013-11-02	2013	november	9				2014-11-16	november
2013-11-02	2013	november	15				2014-11-18	november
2013-11-02	2013	november	16				2014-11-19	november
2013-11-02	2013	november	27				2014-11-21	november
2013-11-02	2013	november	24				2014-11-25	november
2013-11-02	2013	november	23				2014-11-30	november
2013-11-02	2013	november	9				2014-12-01	december
2013-11-02	2013	november	15				2014-12-02	december
2013-11-02	2013	november	16				2014-12-03	december
2013-11-02	2013	november	20				2014-12-05	december
2013-11-02	2013	november	21				2014-12-08	december
2013-11-02	2013	november	17				2014-12-11	december
2013-11-02	2013	november	26				2014-12-15	december
2013-11-03	2013	november	5				2014-12-17	december
2013-11-03	2013	november	2				2014-12-19	december
2013-11-03	2013	november	4				2014-12-22	december
2013-11-03	2013	november	1				2014-12-24	december
2013-11-03	2013	november	10				2014-12-26	december
2013-11-03	2013	november	7				2014-12-30	december
2013-11-03	2013	november	12				2014-12-31	december
2013-11-03	2013	november	8				2015-01-05	january
2013-11-03	2013	november	14				2015-01-13	january
2013-11-03	2013	november	3				2015-01-14	january
2013-11-03	2013	november	30				2015-01-21	january
2013-11-04	2013	november	10				2015-01-26	january
2013-11-04	2013	november	7				2015-01-27	january
2013-11-04	2013	november	12				2015-01-28	january
2013-11-04	2013	november	3				2015-01-29	january
2013-11-04	2013	november	8				2015-01-30	january
2013-11-04	2013	november	14				2015-02-02	february
2013-11-04	2013	november	5				2015-02-04	february
2013-11-04	2013	november	4				2015-02-10	february
2013-11-04	2013	november	2				2015-02-11	february
2013-11-04	2013	november	1				2015-02-12	february
2013-11-04	2013	november	11				2015-02-25	february
2013-11-05	2013	november	17				2015-03-02	march
2013-11-05	2013	november	26				2015-03-10	march
2013-11-05	2013	november	21				2015-03-12	march
2013-11-05	2013	november	20				2015-03-16	march
2013-11-05	2013	november	9				2015-03-17	march
2013-11-05	2013	november	15				2015-03-18	march
2013-11-05	2013	november	16				2015-03-20	march
2013-11-05	2013	november	23				2015-03-22	march
2013-11-05	2013	november	24				2015-03-23	march
2013-11-05	2013	november	27				2015-03-24	march
2013-11-05	2013	november	2				2015-03-25	march
2013-11-05	2013	november	4				2015-03-26	march
2013-11-05	2013	november	5				2015-03-29	march
2013-11-05	2013	november	1				2015-03-31	march
2013-11-05	2013	november	10				2015-04-01	april
2013-11-05	2013	november	7				2015-04-02	april
2013-11-05	2013	november	12				2015-04-06	april
2013-11-05	2013	november	3				2015-04-07	april
2013-11-05	2013	november	8				2015-04-08	april
2013-11-05	2013	november	14				2015-04-10	april
2013-11-06	2013	november	26				2015-04-12	april
2013-11-06	2013	november	17				2015-04-13	april
2013-11-06	2013	november	21				2015-04-15	april
2013-11-06	2013	november	20				2015-04-17	april
2013-11-06	2013	november	9				2015-04-20	april
2013-11-06	2013	november	16				2015-04-21	april
2013-11-06	2013	november	15				2015-04-23	april
2013-11-06	2013	november	23				2015-04-24	april
2013-11-06	2013	november	24				2015-04-27	april
2013-11-06	2013	november	27				2015-04-28	april
2013-11-06	2013	november	11				2015-04-29	april
2013-11-07	2013	november	30				2015-05-03	may
2013-11-07	2013	november	8				2015-05-04	may
2013-11-07	2013	november	14				2015-05-06	may
2013-11-07	2013	november	3				2015-05-11	may
2013-11-07	2013	november	10				2015-05-13	may
2013-11-07	2013	november	12				2015-05-20	may
2013-11-07	2013	november	7				2015-05-27	may
2013-11-07	2013	november	2
2013-11-07	2013	november	4
2013-11-07	2013	november	1
2013-11-07	2013	november	5
2013-11-07	2013	november	15
2013-11-07	2013	november	9
2013-11-07	2013	november	23
2013-11-07	2013	november	24
2013-11-07	2013	november	27
2013-11-07	2013	november	17
2013-11-07	2013	november	26
2013-11-07	2013	november	20
2013-11-07	2013	november	20
2013-11-07	2013	november	21
2013-11-08	2013	november	8
2013-11-08	2013	november	14
2013-11-08	2013	november	3
2013-11-08	2013	november	12
2013-11-08	2013	november	10
2013-11-08	2013	november	7
2013-11-08	2013	november	1
2013-11-08	2013	november	2
2013-11-08	2013	november	4
2013-11-08	2013	november	5
2013-11-08	2013	november	27
2013-11-08	2013	november	24
2013-11-08	2013	november	x
2013-11-08	2013	november	x
2013-11-08	2013	november	23
2013-11-08	2013	november	17
2013-11-08	2013	november	11
2013-11-09	2013	november	27
2013-11-09	2013	november	24
2013-11-09	2013	november	23
2013-11-09	2013	november	9
2013-11-09	2013	november	16
2013-11-09	2013	november	15
2013-11-09	2013	november	21
2013-11-09	2013	november	20
2013-11-09	2013	november	17
2013-11-09	2013	november	26
2013-11-09	2013	november	x
2013-11-10	2013	november	17
2013-11-10	2013	november	26
2013-11-10	2013	november	20
2013-11-10	2013	november	21
2013-11-10	2013	november	9
2013-11-10	2013	november	15
2013-11-10	2013	november	16
2013-11-10	2013	november	23
2013-11-10	2013	november	24
2013-11-10	2013	november	27
2013-11-11	2013	november	15
2013-11-11	2013	november	16
2013-11-11	2013	november	20
2013-11-11	2013	november	21
2013-11-11	2013	november	9
2013-11-11	2013	november	2
2013-11-11	2013	november	4
2013-11-11	2013	november	10
2013-11-11	2013	november	12
2013-11-11	2013	november	1
2013-11-11	2013	november	23
2013-11-11	2013	november	24
2013-11-11	2013	november	11
2013-11-11	2013	november	27
2013-11-11	2013	november	7
2013-11-11	2013	november	3
2013-11-11	2013	november	14
2013-11-12	2013	november	17
2013-11-12	2013	november	26
2013-11-12	2013	november	20
2013-11-12	2013	november	21
2013-11-12	2013	november	9
2013-11-12	2013	november	15
2013-11-12	2013	november	16
2013-11-12	2013	november	23
2013-11-12	2013	november	24
2013-11-12	2013	november	27
2013-11-12	2013	november	2
2013-11-12	2013	november	4
2013-11-12	2013	november	5
2013-11-12	2013	november	1
2013-11-12	2013	november	10
2013-11-12	2013	november	7
2013-11-12	2013	november	7
2013-11-12	2013	november	12
2013-11-12	2013	november	3
2013-11-12	2013	november	8
2013-11-12	2013	november	14
2013-11-12	2013	november	x
2013-11-12	2013	november	11
2013-11-13	2013	november	11
2013-11-14	2013	november	30
2013-11-14	2013	november	8
2013-11-14	2013	november	14
2013-11-14	2013	november	3
2013-11-14	2013	november	12
2013-11-14	2013	november	10
2013-11-14	2013	november	7
2013-11-14	2013	november	5
2013-11-14	2013	november	2
2013-11-14	2013	november	4
2013-11-14	2013	november	1
2013-11-14	2013	november	15
2013-11-14	2013	november	9
2013-11-14	2013	november	21
2013-11-14	2013	november	20
2013-11-14	2013	november	26
2013-11-14	2013	november	17
2013-11-14	2013	november	23
2013-11-14	2013	november	24
2013-11-14	2013	november	27
2013-11-14	2013	november	11
2013-11-15	2013	november	3
2013-11-15	2013	november	8
2013-11-15	2013	november	14
2013-11-15	2013	november	12
2013-11-15	2013	november	7
2013-11-15	2013	november	x
2013-11-15	2013	november	x
2013-11-15	2013	november	x
2013-11-15	2013	november	10
2013-11-15	2013	november	1
2013-11-15	2013	november	x
2013-11-15	2013	november	2
2013-11-15	2013	november	4
2013-11-15	2013	november	5
2013-11-15	2013	november	11
2013-11-16	2013	november	17
2013-11-16	2013	november	26
2013-11-16	2013	november	20
2013-11-16	2013	november	21
2013-11-16	2013	november	9
2013-11-16	2013	november	15
2013-11-16	2013	november	16
2013-11-16	2013	november	8
2013-11-16	2013	november	14
2013-11-16	2013	november	3
2013-11-16	2013	november	12
2013-11-16	2013	november	7
2013-11-16	2013	november	10
2013-11-16	2013	november	1
2013-11-16	2013	november	2
2013-11-16	2013	november	4
2013-11-16	2013	november	5
2013-11-17	2013	november	2
2013-11-17	2013	november	4
2013-11-17	2013	november	1
2013-11-17	2013	november	5
2013-11-17	2013	november	12
2013-11-17	2013	november	10
2013-11-17	2013	november	7
2013-11-17	2013	november	8
2013-11-17	2013	november	14
2013-11-17	2013	november	3
2013-11-17	2013	november	30
2013-11-18	2013	november	2
2013-11-18	2013	november	4
2013-11-18	2013	november	5
2013-11-18	2013	november	1
2013-11-18	2013	november	17
2013-11-18	2013	november	26
2013-11-18	2013	november	20
2013-11-18	2013	november	21
2013-11-18	2013	november	9
2013-11-18	2013	november	16
2013-11-18	2013	november	x
2013-11-18	2013	november	15
2013-11-18	2013	november	27
2013-11-18	2013	november	24
2013-11-18	2013	november	23
2013-11-18	2013	november	10
2013-11-18	2013	november	7
2013-11-18	2013	november	12
2013-11-18	2013	november	3
2013-11-18	2013	november	14
2013-11-18	2013	november	8
2013-11-18	2013	november	11
2013-11-19	2013	november	17
2013-11-19	2013	november	26
2013-11-19	2013	november	20
2013-11-19	2013	november	21
2013-11-19	2013	november	9
2013-11-19	2013	november	15
2013-11-19	2013	november	16
2013-11-19	2013	november	24
2013-11-19	2013	november	23
2013-11-19	2013	november	27
2013-11-20	2013	november	3
2013-11-20	2013	november	8
2013-11-20	2013	november	5
2013-11-20	2013	november	14
2013-11-20	2013	november	12
2013-11-20	2013	november	x
2013-11-20	2013	november	7
2013-11-20	2013	november	10
2013-11-20	2013	november	1
2013-11-20	2013	november	2
2013-11-20	2013	november	4
2013-11-20	2013	november	11
2013-11-21	2013	november	2
2013-11-21	2013	november	4
2013-11-21	2013	november	1
2013-11-21	2013	november	5
2013-11-21	2013	november	12
2013-11-21	2013	november	10
2013-11-21	2013	november	7
2013-11-21	2013	november	3
2013-11-21	2013	november	14
2013-11-21	2013	november	8
2013-11-21	2013	november	30
2013-11-21	2013	november	15
2013-11-21	2013	november	9
2013-11-21	2013	november	20
2013-11-21	2013	november	21
2013-11-21	2013	november	x
2013-11-21	2013	november	26
2013-11-21	2013	november	17
2013-11-21	2013	november	23
2013-11-21	2013	november	24
2013-11-21	2013	november	27
2013-11-24	2013	november	17
2013-11-24	2013	november	26
2013-11-24	2013	november	20
2013-11-24	2013	november	21
2013-11-24	2013	november	9
2013-11-24	2013	november	15
2013-11-24	2013	november	16
2013-11-24	2013	november	23
2013-11-24	2013	november	24
2013-11-24	2013	november	27
2013-11-25	2013	november	11
2013-12-02	2013	december	2
2013-12-02	2013	december	4
2013-12-02	2013	december	5
2013-12-02	2013	december	1
2013-12-02	2013	december	10
2013-12-02	2013	december	7
2013-12-02	2013	december	12
2013-12-02	2013	december	3
2013-12-02	2013	december	14
2013-12-02	2013	december	8
2013-12-03	2013	december	2
2013-12-03	2013	december	4
2013-12-03	2013	december	x
2013-12-03	2013	december	5
2013-12-03	2013	december	1
2013-12-03	2013	december	10
2013-12-03	2013	december	7
2013-12-03	2013	december	12
2013-12-03	2013	december	3
2013-12-03	2013	december	8
2013-12-03	2013	december	14
2013-12-04	2013	december	17
2013-12-04	2013	december	26
2013-12-04	2013	december	20
2013-12-04	2013	december	21
2013-12-04	2013	december	9
2013-12-04	2013	december	16
2013-12-04	2013	december	15
2013-12-04	2013	december	27
2013-12-04	2013	december	24
2013-12-04	2013	december	23
2013-12-04	2013	december	11
2013-12-05	2013	december	15
2013-12-05	2013	december	x
2013-12-05	2013	december	9
2013-12-05	2013	december	21
2013-12-05	2013	december	20
2013-12-05	2013	december	26
2013-12-05	2013	december	17
2013-12-05	2013	december	23
2013-12-05	2013	december	24
2013-12-05	2013	december	27
2013-12-09	2013	december	17
2013-12-09	2013	december	26
2013-12-09	2013	december	20
2013-12-09	2013	december	21
2013-12-09	2013	december	9
2013-12-09	2013	december	16
2013-12-09	2013	december	15
2013-12-09	2013	december	27
2013-12-09	2013	december	24
2013-12-09	2013	december	23
2013-12-10	2013	december	17
2013-12-10	2013	december	26
2013-12-10	2013	december	20
2013-12-10	2013	december	21
2013-12-10	2013	december	9
2013-12-10	2013	december	15
2013-12-10	2013	december	16
2013-12-10	2013	december	23
2013-12-10	2013	december	24
2013-12-11	2013	december	2
2013-12-11	2013	december	4
2013-12-11	2013	december	1
2013-12-11	2013	december	10
2013-12-11	2013	december	7
2013-12-11	2013	december	12
2013-12-11	2013	december	3
2013-12-11	2013	december	14
2013-12-11	2013	december	8
2013-12-13	2013	december	11
2013-12-15	2013	december	17
2013-12-15	2013	december	26
2013-12-15	2013	december	21
2013-12-15	2013	december	20
2013-12-15	2013	december	9
2013-12-15	2013	december	15
2013-12-15	2013	december	16
2013-12-15	2013	december	23
2013-12-15	2013	december	24
2013-12-15	2013	december	27
2013-12-16	2013	december	2
2013-12-16	2013	december	4
2013-12-16	2013	december	1
2013-12-16	2013	december	10
2013-12-16	2013	december	7
2013-12-16	2013	december	12
2013-12-16	2013	december	3
2013-12-16	2013	december	14
2013-12-16	2013	december	8
2013-12-17	2013	december	17
2013-12-17	2013	december	26
2013-12-17	2013	december	20
2013-12-17	2013	december	21
2013-12-17	2013	december	9
2013-12-17	2013	december	15
2013-12-17	2013	december	16
2013-12-17	2013	december	23
2013-12-17	2013	december	24
2013-12-17	2013	december	27
2013-12-17	2013	december	11
2013-12-19	2013	december	17
2013-12-19	2013	december	26
2013-12-19	2013	december	20
2013-12-19	2013	december	21
2013-12-19	2013	december	9
2013-12-19	2013	december	15
2013-12-19	2013	december	16
2013-12-19	2013	december	23
2013-12-19	2013	december	24
2013-12-19	2013	december	27
2014-01-02	2014	january	11
2014-01-03	2014	january	11
2014-01-06	2014	january	2
2014-01-06	2014	january	4
2014-01-06	2014	january	1
2014-01-06	2014	january	10
2014-01-06	2014	january	7
2014-01-06	2014	january	12
2014-01-06	2014	january	3
2014-01-06	2014	january	14
2014-01-06	2014	january	8
2014-01-08	2014	january	17
2014-01-08	2014	january	26
2014-01-08	2014	january	20
2014-01-08	2014	january	21
2014-01-08	2014	january	9
2014-01-08	2014	january	16
2014-01-08	2014	january	15
2014-01-08	2014	january	27
2014-01-08	2014	january	24
2014-01-08	2014	january	23
2014-01-09	2014	january	2
2014-01-09	2014	january	4
2014-01-09	2014	january	1
2014-01-09	2014	january	10
2014-01-09	2014	january	7
2014-01-09	2014	january	12
2014-01-09	2014	january	8
2014-01-09	2014	january	14
2014-01-09	2014	january	3
2014-01-09	2014	january	30
2014-01-09	2014	january	11
2014-01-10	2014	january	11
2014-01-12	2014	january	17
2014-01-12	2014	january	26
2014-01-12	2014	january	20
2014-01-12	2014	january	21
2014-01-12	2014	january	9
2014-01-12	2014	january	15
2014-01-12	2014	january	16
2014-01-12	2014	january	23
2014-01-12	2014	january	24
2014-01-12	2014	january	27
2014-01-13	2014	january	2
2014-01-13	2014	january	4
2014-01-13	2014	january	1
2014-01-13	2014	january	10
2014-01-13	2014	january	7
2014-01-13	2014	january	12
2014-01-13	2014	january	3
2014-01-13	2014	january	14
2014-01-13	2014	january	8
2014-01-14	2014	january	30
2014-01-14	2014	january	8
2014-01-14	2014	january	14
2014-01-14	2014	january	3
2014-01-14	2014	january	10
2014-01-14	2014	january	12
2014-01-14	2014	january	7
2014-01-14	2014	january	1
2014-01-14	2014	january	2
2014-01-14	2014	january	4
2014-01-15	2014	january	17
2014-01-15	2014	january	26
2014-01-15	2014	january	20
2014-01-15	2014	january	21
2014-01-15	2014	january	9
2014-01-15	2014	january	16
2014-01-15	2014	january	15
2014-01-15	2014	january	27
2014-01-15	2014	january	24
2014-01-15	2014	january	23
2014-01-16	2014	january	7
2014-01-16	2014	january	1
2014-01-16	2014	january	2
2014-01-16	2014	january	4
2014-01-16	2014	january	10
2014-01-16	2014	january	12
2014-01-16	2014	january	3
2014-01-16	2014	january	14
2014-01-16	2014	january	8
2014-01-16	2014	january	30
2014-01-17	2014	january	11
2014-01-19	2014	january	17
2014-01-19	2014	january	26
2014-01-19	2014	january	20
2014-01-19	2014	january	21
2014-01-19	2014	january	9
2014-01-19	2014	january	15
2014-01-19	2014	january	16
2014-01-19	2014	january	23
2014-01-19	2014	january	24
2014-01-19	2014	january	27
2014-01-20	2014	january	2
2014-01-20	2014	january	4
2014-01-20	2014	january	1
2014-01-20	2014	january	10
2014-01-20	2014	january	7
2014-01-20	2014	january	12
2014-01-20	2014	january	3
2014-01-20	2014	january	14
2014-01-20	2014	january	8
2014-01-22	2014	january	17
2014-01-22	2014	january	26
2014-01-22	2014	january	20
2014-01-22	2014	january	21
2014-01-22	2014	january	9
2014-01-22	2014	january	16
2014-01-22	2014	january	15
2014-01-22	2014	january	27
2014-01-22	2014	january	24
2014-01-22	2014	january	23
2014-01-23	2014	january	1
2014-01-23	2014	january	2
2014-01-23	2014	january	4
2014-01-23	2014	january	10
2014-01-23	2014	january	7
2014-01-23	2014	january	12
2014-01-23	2014	january	3
2014-01-23	2014	january	14
2014-01-23	2014	january	8
2014-01-23	2014	january	30
2014-01-23	2014	january	11
2014-01-24	2014	january	11
2014-01-27	2014	january	2
2014-01-27	2014	january	4
2014-01-27	2014	january	1
2014-01-27	2014	january	10
2014-01-27	2014	january	7
2014-01-27	2014	january	12
2014-01-27	2014	january	3
2014-01-27	2014	january	14
2014-01-27	2014	january	8
2014-01-27	2014	january	11
2014-01-28	2014	january	17
2014-01-28	2014	january	26
2014-01-28	2014	january	20
2014-01-28	2014	january	21
2014-01-28	2014	january	9
2014-01-28	2014	january	15
2014-01-28	2014	january	16
2014-01-28	2014	january	23
2014-01-28	2014	january	24
2014-01-28	2014	january	27
2014-01-31	2014	january	11
2014-02-03	2014	february	2
2014-02-03	2014	february	4
2014-02-03	2014	february	1
2014-02-03	2014	february	10
2014-02-03	2014	february	7
2014-02-03	2014	february	12
2014-02-03	2014	february	3
2014-02-03	2014	february	14
2014-02-03	2014	february	8
2014-02-03	2014	february	11
2014-02-04	2014	february	17
2014-02-04	2014	february	26
2014-02-04	2014	february	20
2014-02-04	2014	february	21
2014-02-04	2014	february	9
2014-02-04	2014	february	15
2014-02-04	2014	february	16
2014-02-04	2014	february	23
2014-02-04	2014	february	24
2014-02-04	2014	february	27
2014-02-04	2014	february	11
2014-02-05	2014	february	17
2014-02-05	2014	february	26
2014-02-05	2014	february	20
2014-02-05	2014	february	21
2014-02-05	2014	february	9
2014-02-05	2014	february	16
2014-02-05	2014	february	15
2014-02-05	2014	february	27
2014-02-05	2014	february	24
2014-02-05	2014	february	23
2014-02-06	2014	february	17
2014-02-06	2014	february	26
2014-02-06	2014	february	20
2014-02-06	2014	february	21
2014-02-06	2014	february	9
2014-02-06	2014	february	15
2014-02-06	2014	february	16
2014-02-06	2014	february	23
2014-02-06	2014	february	24
2014-02-06	2014	february	27
2014-02-09	2014	february	1
2014-02-09	2014	february	2
2014-02-09	2014	february	4
2014-02-09	2014	february	10
2014-02-09	2014	february	12
2014-02-09	2014	february	7
2014-02-09	2014	february	8
2014-02-09	2014	february	14
2014-02-09	2014	february	3
2014-02-09	2014	february	30
2014-02-10	2014	february	2
2014-02-10	2014	february	4
2014-02-10	2014	february	1
2014-02-10	2014	february	10
2014-02-10	2014	february	7
2014-02-10	2014	february	12
2014-02-10	2014	february	3
2014-02-10	2014	february	14
2014-02-10	2014	february	8
2014-02-10	2014	february	11
2014-02-11	2014	february	17
2014-02-11	2014	february	26
2014-02-11	2014	february	20
2014-02-11	2014	february	21
2014-02-11	2014	february	9
2014-02-11	2014	february	15
2014-02-11	2014	february	16
2014-02-11	2014	february	23
2014-02-11	2014	february	24
2014-02-11	2014	february	27
2014-02-17	2014	february	2
2014-02-17	2014	february	4
2014-02-17	2014	february	1
2014-02-17	2014	february	10
2014-02-17	2014	february	7
2014-02-17	2014	february	12
2014-02-17	2014	february	x
2014-02-17	2014	february	3
2014-02-17	2014	february	14
2014-02-17	2014	february	8
2014-02-19	2014	february	17
2014-02-19	2014	february	26
2014-02-19	2014	february	20
2014-02-19	2014	february	21
2014-02-19	2014	february	9
2014-02-19	2014	february	16
2014-02-19	2014	february	15
2014-02-19	2014	february	27
2014-02-19	2014	february	24
2014-02-19	2014	february	23
2014-02-20	2014	february	1
2014-02-20	2014	february	2
2014-02-20	2014	february	4
2014-02-20	2014	february	10
2014-02-20	2014	february	12
2014-02-20	2014	february	7
2014-02-20	2014	february	3
2014-02-20	2014	february	14
2014-02-20	2014	february	8
2014-02-20	2014	february	30
2014-02-23	2014	february	17
2014-02-23	2014	february	26
2014-02-23	2014	february	20
2014-02-23	2014	february	21
2014-02-23	2014	february	15
2014-02-23	2014	february	16
2014-02-23	2014	february	9
2014-02-23	2014	february	27
2014-02-23	2014	february	24
2014-02-23	2014	february	23
2014-02-24	2014	february	2
2014-02-24	2014	february	4
2014-02-24	2014	february	1
2014-02-24	2014	february	10
2014-02-24	2014	february	7
2014-02-24	2014	february	12
2014-02-24	2014	february	3
2014-02-24	2014	february	14
2014-02-24	2014	february	8
2014-02-26	2014	february	17
2014-02-26	2014	february	26
2014-02-26	2014	february	20
2014-02-26	2014	february	21
2014-02-26	2014	february	9
2014-02-26	2014	february	16
2014-02-26	2014	february	15
2014-02-26	2014	february	27
2014-02-26	2014	february	24
2014-02-26	2014	february	23
2014-02-28	2014	february	11
2014-03-04	2014	march	17
2014-03-04	2014	march	26
2014-03-04	2014	march	20
2014-03-04	2014	march	21
2014-03-04	2014	march	9
2014-03-04	2014	march	15
2014-03-04	2014	march	16
2014-03-04	2014	march	23
2014-03-04	2014	march	24
2014-03-07	2014	march	7
2014-03-07	2014	march	12
2014-03-07	2014	march	10
2014-03-07	2014	march	1
2014-03-07	2014	march	2
2014-03-07	2014	march	4
2014-03-07	2014	march	8
2014-03-07	2014	march	14
2014-03-07	2014	march	3
2014-03-07	2014	march	30
2014-03-07	2014	march	11
2014-03-10	2014	march	2
2014-03-10	2014	march	4
2014-03-10	2014	march	1
2014-03-10	2014	march	10
2014-03-10	2014	march	7
2014-03-10	2014	march	12
2014-03-10	2014	march	3
2014-03-10	2014	march	14
2014-03-10	2014	march	8
2014-03-11	2014	march	26
2014-03-11	2014	march	20
2014-03-11	2014	march	21
2014-03-11	2014	march	17
2014-03-11	2014	march	9
2014-03-11	2014	march	15
2014-03-11	2014	march	16
2014-03-11	2014	march	23
2014-03-11	2014	march	24
2014-03-11	2014	march	27
2014-03-11	2014	march	11
2014-03-12	2014	march	17
2014-03-12	2014	march	26
2014-03-12	2014	march	20
2014-03-12	2014	march	21
2014-03-12	2014	march	x
2014-03-12	2014	march	9
2014-03-12	2014	march	16
2014-03-12	2014	march	15
2014-03-12	2014	march	27
2014-03-12	2014	march	24
2014-03-12	2014	march	23
2014-03-13	2014	march	1
2014-03-13	2014	march	2
2014-03-13	2014	march	4
2014-03-13	2014	march	10
2014-03-13	2014	march	12
2014-03-13	2014	march	7
2014-03-13	2014	march	3
2014-03-13	2014	march	14
2014-03-13	2014	march	8
2014-03-13	2014	march	30
2014-03-13	2014	march	11
2014-03-16	2014	march	17
2014-03-16	2014	march	26
2014-03-16	2014	march	20
2014-03-16	2014	march	21
2014-03-16	2014	march	15
2014-03-16	2014	march	16
2014-03-17	2014	march	2
2014-03-17	2014	march	4
2014-03-17	2014	march	1
2014-03-17	2014	march	10
2014-03-17	2014	march	7
2014-03-17	2014	march	12
2014-03-17	2014	march	3
2014-03-17	2014	march	14
2014-03-17	2014	march	8
2014-03-19	2014	march	17
2014-03-19	2014	march	x
2014-03-19	2014	march	26
2014-03-19	2014	march	20
2014-03-19	2014	march	21
2014-03-19	2014	march	9
2014-03-19	2014	march	16
2014-03-19	2014	march	15
2014-03-19	2014	march	27
2014-03-19	2014	march	24
2014-03-19	2014	march	23
2014-03-19	2014	march	11
2014-03-21	2014	march	11
2014-03-24	2014	march	2
2014-03-24	2014	march	4
2014-03-24	2014	march	1
2014-03-24	2014	march	x
2014-03-24	2014	march	10
2014-03-24	2014	march	7
2014-03-24	2014	march	12
2014-03-24	2014	march	3
2014-03-24	2014	march	14
2014-03-24	2014	march	8
2014-03-24	2014	march	11
2014-03-26	2014	march	3
2014-03-26	2014	march	14
2014-03-26	2014	march	8
2014-03-26	2014	march	10
2014-03-26	2014	march	12
2014-03-26	2014	march	7
2014-03-26	2014	march	4
2014-03-26	2014	march	2
2014-03-26	2014	march	1
2014-03-26	2014	march	30
2014-03-26	2014	march	31
2014-03-27	2014	march	17
2014-03-27	2014	march	26
2014-03-27	2014	march	20
2014-03-27	2014	march	21
2014-03-27	2014	march	9
2014-03-27	2014	march	15
2014-03-27	2014	march	16
2014-03-27	2014	march	23
2014-03-27	2014	march	24
2014-03-27	2014	march	27
2014-03-30	2014	march	2
2014-03-30	2014	march	4
2014-03-30	2014	march	1
2014-03-30	2014	march	7
2014-03-30	2014	march	10
2014-03-30	2014	march	12
2014-03-30	2014	march	3
2014-03-30	2014	march	14
2014-03-30	2014	march	8
2014-03-30	2014	march	30
2014-03-31	2014	march	27
2014-03-31	2014	march	24
2014-03-31	2014	march	23
2014-03-31	2014	march	21
2014-03-31	2014	march	20
2014-03-31	2014	march	15
2014-03-31	2014	march	16
2014-03-31	2014	march	9
2014-03-31	2014	march	17
2014-03-31	2014	march	26
2014-03-31	2014	march	2
2014-03-31	2014	march	4
2014-03-31	2014	march	1
2014-03-31	2014	march	10
2014-03-31	2014	march	7
2014-03-31	2014	march	12
2014-03-31	2014	march	3
2014-03-31	2014	march	14
2014-03-31	2014	march	8
2014-03-31	2014	march	11
2014-04-01	2014	april	20
2014-04-01	2014	april	21
2014-04-01	2014	april	26
2014-04-01	2014	april	17
2014-04-01	2014	april	23
2014-04-01	2014	april	24
2014-04-01	2014	april	27
2014-04-01	2014	april	9
2014-04-01	2014	april	15
2014-04-01	2014	april	16
2014-04-01	2014	april	11
2014-04-02	2014	april	17
2014-04-02	2014	april	26
2014-04-02	2014	april	20
2014-04-02	2014	april	21
2014-04-02	2014	april	x
2014-04-02	2014	april	9
2014-04-02	2014	april	16
2014-04-02	2014	april	15
2014-04-02	2014	april	27
2014-04-02	2014	april	24
2014-04-02	2014	april	23
2014-04-03	2014	april	14
2014-04-03	2014	april	3
2014-04-03	2014	april	8
2014-04-03	2014	april	10
2014-04-03	2014	april	12
2014-04-03	2014	april	7
2014-04-03	2014	april	4
2014-04-03	2014	april	2
2014-04-03	2014	april	1
2014-04-03	2014	april	30
2014-04-03	2014	april	11
2014-04-04	2014	april	2
2014-04-04	2014	april	1
2014-04-04	2014	april	4
2014-04-04	2014	april	10
2014-04-04	2014	april	7
2014-04-04	2014	april	27
2014-04-04	2014	april	24
2014-04-04	2014	april	23
2014-04-04	2014	april	9
2014-04-04	2014	april	15
2014-04-04	2014	april	20
2014-04-04	2014	april	21
2014-04-04	2014	april	17
2014-04-04	2014	april	26
2014-04-06	2014	april	30
2014-04-06	2014	april	8
2014-04-06	2014	april	14
2014-04-06	2014	april	3
2014-04-06	2014	april	12
2014-04-06	2014	april	7
2014-04-06	2014	april	10
2014-04-06	2014	april	1
2014-04-06	2014	april	2
2014-04-06	2014	april	4
2014-04-06	2014	april	27
2014-04-06	2014	april	24
2014-04-06	2014	april	23
2014-04-06	2014	april	17
2014-04-06	2014	april	26
2014-04-06	2014	april	20
2014-04-06	2014	april	21
2014-04-06	2014	april	16
2014-04-06	2014	april	15
2014-04-06	2014	april	x
2014-04-06	2014	april	9
2014-04-07	2014	april	27
2014-04-07	2014	april	24
2014-04-07	2014	april	23
2014-04-07	2014	april	15
2014-04-07	2014	april	16
2014-04-07	2014	april	9
2014-04-07	2014	april	20
2014-04-07	2014	april	21
2014-04-07	2014	april	17
2014-04-07	2014	april	26
2014-04-07	2014	april	11
2014-04-08	2014	april	17
2014-04-08	2014	april	26
2014-04-08	2014	april	20
2014-04-08	2014	april	21
2014-04-08	2014	april	15
2014-04-08	2014	april	16
2014-04-08	2014	april	9
2014-04-08	2014	april	27
2014-04-08	2014	april	24
2014-04-08	2014	april	23
2014-04-09	2014	april	3
2014-04-09	2014	april	8
2014-04-09	2014	april	14
2014-04-09	2014	april	12
2014-04-09	2014	april	7
2014-04-09	2014	april	10
2014-04-09	2014	april	4
2014-04-09	2014	april	2
2014-04-09	2014	april	1
2014-04-09	2014	april	30
2014-04-09	2014	april	31
2014-04-10	2014	april	26
2014-04-10	2014	april	20
2014-04-10	2014	april	21
2014-04-10	2014	april	17
2014-04-10	2014	april	15
2014-04-10	2014	april	16
2014-04-10	2014	april	9
2014-04-10	2014	april	27
2014-04-10	2014	april	24
2014-04-10	2014	april	23
2014-04-10	2014	april	1
2014-04-10	2014	april	2
2014-04-10	2014	april	4
2014-04-10	2014	april	10
2014-04-10	2014	april	7
2014-04-10	2014	april	12
2014-04-10	2014	april	3
2014-04-10	2014	april	14
2014-04-10	2014	april	8
2014-04-10	2014	april	30
2014-04-11	2014	april	4
2014-04-11	2014	april	2
2014-04-11	2014	april	1
2014-04-11	2014	april	7
2014-04-11	2014	april	10
2014-04-11	2014	april	12
2014-04-11	2014	april	3
2014-04-11	2014	april	14
2014-04-11	2014	april	8
2014-04-11	2014	april	30
2014-04-14	2014	april	27
2014-04-14	2014	april	24
2014-04-14	2014	april	23
2014-04-14	2014	april	21
2014-04-14	2014	april	20
2014-04-14	2014	april	15
2014-04-14	2014	april	16
2014-04-14	2014	april	9
2014-04-14	2014	april	17
2014-04-14	2014	april	26
2014-04-14	2014	april	31
2014-04-15	2014	april	2
2014-04-15	2014	april	4
2014-04-15	2014	april	1
2014-04-15	2014	april	10
2014-04-15	2014	april	12
2014-04-15	2014	april	7
2014-04-15	2014	april	3
2014-04-15	2014	april	14
2014-04-15	2014	april	8
2014-04-15	2014	april	30
2014-04-16	2014	april	27
2014-04-16	2014	april	24
2014-04-16	2014	april	23
2014-04-16	2014	april	15
2014-04-16	2014	april	16
2014-04-16	2014	april	9
2014-04-16	2014	april	20
2014-04-16	2014	april	21
2014-04-16	2014	april	17
2014-04-16	2014	april	26
2014-04-16	2014	april	17
2014-04-16	2014	april	26
2014-04-16	2014	april	20
2014-04-16	2014	april	21
2014-04-16	2014	april	9
2014-04-16	2014	april	16
2014-04-16	2014	april	15
2014-04-16	2014	april	27
2014-04-16	2014	april	24
2014-04-16	2014	april	23
2014-04-17	2014	april	17
2014-04-17	2014	april	26
2014-04-17	2014	april	20
2014-04-17	2014	april	21
2014-04-17	2014	april	9
2014-04-17	2014	april	15
2014-04-17	2014	april	16
2014-04-17	2014	april	24
2014-04-17	2014	april	27
2014-04-17	2014	april	23
2014-04-17	2014	april	4
2014-04-17	2014	april	2
2014-04-17	2014	april	1
2014-04-17	2014	april	7
2014-04-17	2014	april	10
2014-04-17	2014	april	12
2014-04-17	2014	april	3
2014-04-17	2014	april	14
2014-04-17	2014	april	8
2014-04-17	2014	april	30
2014-04-18	2014	april	2
2014-04-18	2014	april	4
2014-04-18	2014	april	x
2014-04-18	2014	april	1
2014-04-18	2014	april	10
2014-04-18	2014	april	7
2014-04-18	2014	april	12
2014-04-18	2014	april	3
2014-04-18	2014	april	14
2014-04-18	2014	april	8
2014-04-18	2014	april	26
2014-04-18	2014	april	20
2014-04-18	2014	april	21
2014-04-18	2014	april	17
2014-04-18	2014	april	15
2014-04-18	2014	april	16
2014-04-18	2014	april	9
2014-04-18	2014	april	23
2014-04-18	2014	april	24
2014-04-18	2014	april	27
2014-04-21	2014	april	2
2014-04-21	2014	april	4
2014-04-21	2014	april	1
2014-04-21	2014	april	10
2014-04-21	2014	april	7
2014-04-21	2014	april	12
2014-04-21	2014	april	3
2014-04-21	2014	april	14
2014-04-21	2014	april	8
2014-04-21	2014	april	11
2014-04-22	2014	april	17
2014-04-22	2014	april	26
2014-04-22	2014	april	20
2014-04-22	2014	april	21
2014-04-22	2014	april	15
2014-04-22	2014	april	16
2014-04-22	2014	april	9
2014-04-22	2014	april	27
2014-04-22	2014	april	24
2014-04-22	2014	april	23
2014-04-22	2014	april	11
2014-04-23	2014	april	8
2014-04-23	2014	april	14
2014-04-23	2014	april	3
2014-04-23	2014	april	10
2014-04-23	2014	april	7
2014-04-23	2014	april	12
2014-04-23	2014	april	4
2014-04-23	2014	april	2
2014-04-23	2014	april	1
2014-04-23	2014	april	30
2014-04-23	2014	april	31
2014-04-23	2014	april	11
2014-04-24	2014	april	23
2014-04-24	2014	april	24
2014-04-24	2014	april	27
2014-04-24	2014	april	15
2014-04-24	2014	april	16
2014-04-24	2014	april	9
2014-04-24	2014	april	20
2014-04-24	2014	april	21
2014-04-24	2014	april	17
2014-04-24	2014	april	26
2014-04-25	2014	april	1
2014-04-25	2014	april	4
2014-04-25	2014	april	2
2014-04-25	2014	april	10
2014-04-25	2014	april	7
2014-04-25	2014	april	12
2014-04-25	2014	april	3
2014-04-25	2014	april	14
2014-04-25	2014	april	8
2014-04-25	2014	april	30
2014-04-25	2014	april	x
2014-04-26	2014	april	11
2014-04-28	2014	april	27
2014-04-28	2014	april	24
2014-04-28	2014	april	23
2014-04-28	2014	april	15
2014-04-28	2014	april	16
2014-04-28	2014	april	9
2014-04-28	2014	april	20
2014-04-28	2014	april	21
2014-04-28	2014	april	17
2014-04-28	2014	april	26
2014-04-28	2014	april	2
2014-04-28	2014	april	4
2014-04-28	2014	april	1
2014-04-28	2014	april	10
2014-04-28	2014	april	7
2014-04-28	2014	april	12
2014-04-28	2014	april	3
2014-04-28	2014	april	14
2014-04-28	2014	april	8
2014-04-29	2014	april	2
2014-04-29	2014	april	4
2014-04-29	2014	april	1
2014-04-29	2014	april	7
2014-04-29	2014	april	10
2014-04-29	2014	april	12
2014-04-29	2014	april	3
2014-04-29	2014	april	14
2014-04-29	2014	april	8
2014-04-29	2014	april	30
2014-04-30	2014	april	3
2014-04-30	2014	april	14
2014-04-30	2014	april	8
2014-04-30	2014	april	10
2014-04-30	2014	april	12
2014-04-30	2014	april	7
2014-04-30	2014	april	4
2014-04-30	2014	april	2
2014-04-30	2014	april	1
2014-04-30	2014	april	30
2014-04-30	2014	april	31
2014-04-30	2014	april	11
2014-05-01	2014	may	17
2014-05-01	2014	may	26
2014-05-01	2014	may	20
2014-05-01	2014	may	21
2014-05-01	2014	may	9
2014-05-01	2014	may	15
2014-05-01	2014	may	16
2014-05-01	2014	may	27
2014-05-01	2014	may	24
2014-05-01	2014	may	23
2014-05-01	2014	may	11
2014-05-05	2014	may	27
2014-05-05	2014	may	24
2014-05-05	2014	may	23
2014-05-05	2014	may	15
2014-05-05	2014	may	16
2014-05-05	2014	may	9
2014-05-05	2014	may	20
2014-05-05	2014	may	21
2014-05-05	2014	may	17
2014-05-05	2014	may	26
2014-05-06	2014	may	17
2014-05-06	2014	may	26
2014-05-06	2014	may	20
2014-05-06	2014	may	21
2014-05-06	2014	may	9
2014-05-06	2014	may	15
2014-05-06	2014	may	16
2014-05-06	2014	may	23
2014-05-06	2014	may	24
2014-05-06	2014	may	27
2014-05-07	2014	may	17
2014-05-07	2014	may	26
2014-05-07	2014	may	20
2014-05-07	2014	may	21
2014-05-07	2014	may	9
2014-05-07	2014	may	16
2014-05-07	2014	may	15
2014-05-07	2014	may	27
2014-05-07	2014	may	24
2014-05-07	2014	may	23
2014-05-08	2014	may	1
2014-05-08	2014	may	2
2014-05-08	2014	may	4
2014-05-08	2014	may	10
2014-05-08	2014	may	12
2014-05-08	2014	may	7
2014-05-08	2014	may	3
2014-05-08	2014	may	14
2014-05-08	2014	may	8
2014-05-08	2014	may	30
2014-05-11	2014	may	17
2014-05-11	2014	may	26
2014-05-11	2014	may	20
2014-05-11	2014	may	21
2014-05-11	2014	may	9
2014-05-11	2014	may	15
2014-05-11	2014	may	16
2014-05-11	2014	may	24
2014-05-11	2014	may	27
2014-05-11	2014	may	23
2014-05-13	2014	may	7
2014-05-13	2014	may	12
2014-05-13	2014	may	10
2014-05-13	2014	may	4
2014-05-13	2014	may	2
2014-05-13	2014	may	1
2014-05-13	2014	may	3
2014-05-13	2014	may	14
2014-05-13	2014	may	8
2014-05-13	2014	may	30
2014-05-14	2014	may	17
2014-05-14	2014	may	26
2014-05-14	2014	may	20
2014-05-14	2014	may	21
2014-05-14	2014	may	9
2014-05-14	2014	may	16
2014-05-14	2014	may	15
2014-05-14	2014	may	27
2014-05-14	2014	may	24
2014-05-14	2014	may	23
2014-05-19	2014	may	2
2014-05-19	2014	may	4
2014-05-19	2014	may	1
2014-05-19	2014	may	10
2014-05-19	2014	may	7
2014-05-19	2014	may	12
2014-05-19	2014	may	3
2014-05-19	2014	may	14
2014-05-19	2014	may	8
2014-05-19	2014	may	11
2014-05-21	2014	may	17
2014-05-21	2014	may	26
2014-05-21	2014	may	20
2014-05-21	2014	may	x
2014-05-21	2014	may	21
2014-05-21	2014	may	9
2014-05-21	2014	may	16
2014-05-21	2014	may	15
2014-05-21	2014	may	27
2014-05-21	2014	may	24
2014-05-21	2014	may	23
2014-05-22	2014	may	11
2014-05-23	2014	may	15
2014-05-23	2014	may	16
2014-05-23	2014	may	20
2014-05-23	2014	may	21
2014-05-23	2014	may	11
2014-05-26	2014	may	2
2014-05-26	2014	may	4
2014-05-26	2014	may	1
2014-05-26	2014	may	10
2014-05-26	2014	may	7
2014-05-26	2014	may	12
2014-05-26	2014	may	3
2014-05-26	2014	may	14
2014-05-26	2014	may	8
2014-05-27	2014	may	11
2014-05-29	2014	may	7
2014-05-29	2014	may	12
2014-05-29	2014	may	10
2014-05-29	2014	may	1
2014-05-29	2014	may	2
2014-05-29	2014	may	4
2014-05-29	2014	may	8
2014-05-29	2014	may	14
2014-05-29	2014	may	3
2014-05-29	2014	may	30
2014-06-02	2014	june	2
2014-06-02	2014	june	4
2014-06-02	2014	june	1
2014-06-02	2014	june	10
2014-06-02	2014	june	x
2014-06-02	2014	june	7
2014-06-02	2014	june	12
2014-06-02	2014	june	x
2014-06-02	2014	june	x
2014-06-02	2014	june	3
2014-06-02	2014	june	14
2014-06-02	2014	june	x
2014-06-02	2014	june	8
2014-06-02	2014	june	30
2014-06-04	2014	june	17
2014-06-04	2014	june	26
2014-06-04	2014	june	20
2014-06-04	2014	june	21
2014-06-04	2014	june	9
2014-06-04	2014	june	16
2014-06-04	2014	june	15
2014-06-04	2014	june	27
2014-06-04	2014	june	24
2014-06-04	2014	june	23
2014-06-09	2014	june	2
2014-06-09	2014	june	4
2014-06-09	2014	june	1
2014-06-09	2014	june	12
2014-06-09	2014	june	7
2014-06-09	2014	june	10
2014-06-09	2014	june	3
2014-06-09	2014	june	8
2014-06-09	2014	june	14
2014-06-09	2014	june	30
2014-06-11	2014	june	17
2014-06-11	2014	june	26
2014-06-11	2014	june	20
2014-06-11	2014	june	21
2014-06-11	2014	june	9
2014-06-11	2014	june	16
2014-06-11	2014	june	15
2014-06-11	2014	june	27
2014-06-11	2014	june	24
2014-06-11	2014	june	23
2014-06-15	2014	june	17
2014-06-15	2014	june	26
2014-06-15	2014	june	20
2014-06-15	2014	june	21
2014-06-15	2014	june	9
2014-06-15	2014	june	15
2014-06-15	2014	june	16
2014-06-15	2014	june	24
2014-06-15	2014	june	27
2014-06-15	2014	june	23
2014-06-16	2014	june	2
2014-06-16	2014	june	4
2014-06-16	2014	june	1
2014-06-16	2014	june	12
2014-06-16	2014	june	7
2014-06-16	2014	june	10
2014-06-16	2014	june	3
2014-06-16	2014	june	8
2014-06-16	2014	june	14
2014-06-16	2014	june	30
2014-06-18	2014	june	17
2014-06-18	2014	june	26
2014-06-18	2014	june	20
2014-06-18	2014	june	x
2014-06-18	2014	june	21
2014-06-18	2014	june	9
2014-06-18	2014	june	16
2014-06-18	2014	june	15
2014-06-18	2014	june	27
2014-06-18	2014	june	24
2014-06-18	2014	june	23
2014-06-23	2014	june	2
2014-06-23	2014	june	4
2014-06-23	2014	june	1
2014-06-23	2014	june	12
2014-06-23	2014	june	7
2014-06-23	2014	june	10
2014-06-23	2014	june	3
2014-06-23	2014	june	8
2014-06-23	2014	june	14
2014-06-23	2014	june	30
2014-06-25	2014	june	17
2014-06-25	2014	june	26
2014-06-25	2014	june	20
2014-06-25	2014	june	21
2014-06-25	2014	june	9
2014-06-25	2014	june	16
2014-06-25	2014	june	15
2014-06-25	2014	june	27
2014-06-25	2014	june	24
2014-06-25	2014	june	23
2014-06-30	2014	june	2
2014-06-30	2014	june	4
2014-06-30	2014	june	1
2014-06-30	2014	june	12
2014-06-30	2014	june	7
2014-06-30	2014	june	10
2014-06-30	2014	june	3
2014-06-30	2014	june	8
2014-06-30	2014	june	14
2014-06-30	2014	june	30
2014-07-02	2014	july	17
2014-07-02	2014	july	26
2014-07-02	2014	july	20
2014-07-02	2014	july	21
2014-07-02	2014	july	9
2014-07-02	2014	july	16
2014-07-02	2014	july	15
2014-07-02	2014	july	27
2014-07-02	2014	july	24
2014-07-02	2014	july	23
2014-07-02	2014	july	1
2014-07-02	2014	july	10
2014-07-02	2014	july	12
2014-07-02	2014	july	x
2014-07-02	2014	july	7
2014-07-02	2014	july	11
2014-07-03	2014	july	30
2014-07-03	2014	july	4
2014-07-03	2014	july	2
2014-07-03	2014	july	3
2014-07-03	2014	july	14
2014-07-03	2014	july	8
2014-07-03	2014	july	11
2014-07-03	2014	july	27
2014-07-07	2014	july	2
2014-07-07	2014	july	4
2014-07-07	2014	july	1
2014-07-07	2014	july	12
2014-07-07	2014	july	x
2014-07-07	2014	july	x
2014-07-07	2014	july	7
2014-07-07	2014	july	10
2014-07-07	2014	july	3
2014-07-07	2014	july	8
2014-07-07	2014	july	14
2014-07-07	2014	july	30
2014-07-13	2014	july	7
2014-07-13	2014	july	12
2014-07-13	2014	july	10
2014-07-13	2014	july	1
2014-07-13	2014	july	2
2014-07-13	2014	july	4
2014-07-13	2014	july	3
2014-07-13	2014	july	14
2014-07-13	2014	july	8
2014-07-13	2014	july	30
2014-07-14	2014	july	2
2014-07-14	2014	july	4
2014-07-14	2014	july	1
2014-07-14	2014	july	12
2014-07-14	2014	july	7
2014-07-14	2014	july	10
2014-07-14	2014	july	3
2014-07-14	2014	july	8
2014-07-14	2014	july	14
2014-07-14	2014	july	30
2014-07-16	2014	july	17
2014-07-16	2014	july	17
2014-07-16	2014	july	26
2014-07-16	2014	july	20
2014-07-16	2014	july	21
2014-07-16	2014	july	9
2014-07-16	2014	july	16
2014-07-16	2014	july	15
2014-07-16	2014	july	27
2014-07-16	2014	july	24
2014-07-16	2014	july	23
2014-07-17	2014	july	12
2014-07-17	2014	july	11
2014-07-18	2014	july	11
2014-07-21	2014	july	2
2014-07-21	2014	july	4
2014-07-21	2014	july	1
2014-07-21	2014	july	12
2014-07-21	2014	july	7
2014-07-21	2014	july	10
2014-07-21	2014	july	3
2014-07-21	2014	july	8
2014-07-21	2014	july	14
2014-07-21	2014	july	30
2014-07-21	2014	july	11
2014-07-21	2014	july	24
2014-07-21	2014	july	27
2014-07-21	2014	july	15
2014-07-21	2014	july	16
2014-07-22	2014	july	11
2014-07-23	2014	july	17
2014-07-23	2014	july	26
2014-07-23	2014	july	20
2014-07-23	2014	july	21
2014-07-23	2014	july	9
2014-07-23	2014	july	16
2014-07-23	2014	july	15
2014-07-23	2014	july	27
2014-07-23	2014	july	24
2014-07-23	2014	july	23
2014-07-28	2014	july	2
2014-07-28	2014	july	4
2014-07-28	2014	july	1
2014-07-28	2014	july	12
2014-07-28	2014	july	7
2014-07-28	2014	july	10
2014-07-28	2014	july	3
2014-07-28	2014	july	8
2014-07-28	2014	july	14
2014-07-28	2014	july	30
2014-07-29	2014	july	11
2014-07-30	2014	july	17
2014-07-30	2014	july	26
2014-07-30	2014	july	20
2014-07-30	2014	july	21
2014-07-30	2014	july	9
2014-07-30	2014	july	16
2014-07-30	2014	july	15
2014-07-30	2014	july	27
2014-07-30	2014	july	24
2014-07-30	2014	july	23
2014-07-30	2014	july	1
2014-07-30	2014	july	2
2014-07-30	2014	july	4
2014-07-30	2014	july	14
2014-07-30	2014	july	7
2014-07-30	2014	july	11
2014-07-30	2014	july	x
2014-08-01	2014	august	12
2014-08-01	2014	august	11
2014-08-04	2014	august	2
2014-08-04	2014	august	4
2014-08-04	2014	august	1
2014-08-04	2014	august	12
2014-08-04	2014	august	7
2014-08-04	2014	august	10
2014-08-04	2014	august	3
2014-08-04	2014	august	x
2014-08-04	2014	august	8
2014-08-04	2014	august	14
2014-08-04	2014	august	30
2014-08-04	2014	august	11
2014-08-05	2014	august	11
2014-08-06	2014	august	17
2014-08-06	2014	august	26
2014-08-06	2014	august	20
2014-08-06	2014	august	21
2014-08-06	2014	august	9
2014-08-06	2014	august	16
2014-08-06	2014	august	15
2014-08-06	2014	august	27
2014-08-06	2014	august	24
2014-08-06	2014	august	23
2014-08-13	2014	august	17
2014-08-13	2014	august	26
2014-08-13	2014	august	9
2014-08-13	2014	august	20
2014-08-13	2014	august	21
2014-08-13	2014	august	16
2014-08-13	2014	august	15
2014-08-13	2014	august	27
2014-08-13	2014	august	24
2014-08-13	2014	august	23
2014-08-13	2014	august	11
2014-08-20	2014	august	17
2014-08-20	2014	august	26
2014-08-20	2014	august	20
2014-08-20	2014	august	21
2014-08-20	2014	august	9
2014-08-20	2014	august	16
2014-08-20	2014	august	15
2014-08-20	2014	august	27
2014-08-20	2014	august	24
2014-08-20	2014	august	23
2014-08-21	2014	august	11
2014-08-25	2014	august	2
2014-08-25	2014	august	4
2014-08-25	2014	august	1
2014-08-25	2014	august	12
2014-08-25	2014	august	7
2014-08-25	2014	august	10
2014-08-25	2014	august	3
2014-08-25	2014	august	8
2014-08-25	2014	august	14
2014-08-25	2014	august	30
2014-08-25	2014	august	23
2014-08-25	2014	august	24
2014-08-25	2014	august	11
2014-08-26	2014	august	15
2014-08-26	2014	august	16
2014-08-26	2014	august	11
2014-08-27	2014	august	17
2014-08-27	2014	august	26
2014-08-27	2014	august	20
2014-08-27	2014	august	21
2014-08-27	2014	august	9
2014-08-27	2014	august	16
2014-08-27	2014	august	15
2014-08-27	2014	august	27
2014-08-27	2014	august	24
2014-08-27	2014	august	23
2014-08-27	2014	august	11
2014-08-29	2014	august	11
2014-09-01	2014	september	2
2014-09-01	2014	september	4
2014-09-01	2014	september	1
2014-09-01	2014	september	12
2014-09-01	2014	september	7
2014-09-01	2014	september	10
2014-09-01	2014	september	3
2014-09-01	2014	september	8
2014-09-01	2014	september	14
2014-09-01	2014	september	30
2014-09-02	2014	september	11
2014-09-03	2014	september	17
2014-09-03	2014	september	26
2014-09-03	2014	september	20
2014-09-03	2014	september	21
2014-09-03	2014	september	9
2014-09-03	2014	september	16
2014-09-03	2014	september	15
2014-09-03	2014	september	27
2014-09-03	2014	september	24
2014-09-03	2014	september	23
2014-09-03	2014	september	11
2014-09-05	2014	september	2
2014-09-05	2014	september	4
2014-09-05	2014	september	1
2014-09-05	2014	september	10
2014-09-05	2014	september	12
2014-09-05	2014	september	7
2014-09-05	2014	september	3
2014-09-05	2014	september	14
2014-09-05	2014	september	11
2014-09-07	2014	september	4
2014-09-07	2014	september	2
2014-09-07	2014	september	1
2014-09-07	2014	september	10
2014-09-07	2014	september	7
2014-09-07	2014	september	12
2014-09-07	2014	september	3
2014-09-07	2014	september	14
2014-09-07	2014	september	8
2014-09-07	2014	september	30
2014-09-08	2014	september	23
2014-09-08	2014	september	24
2014-09-08	2014	september	27
2014-09-08	2014	september	16
2014-09-08	2014	september	15
2014-09-08	2014	september	9
2014-09-08	2014	september	21
2014-09-08	2014	september	20
2014-09-08	2014	september	17
2014-09-08	2014	september	26
2014-09-09	2014	september	11
2014-09-10	2014	september	17
2014-09-10	2014	september	26
2014-09-10	2014	september	20
2014-09-10	2014	september	21
2014-09-10	2014	september	9
2014-09-10	2014	september	16
2014-09-10	2014	september	15
2014-09-10	2014	september	27
2014-09-10	2014	september	24
2014-09-10	2014	september	23
2014-09-11	2014	september	24
2014-09-14	2014	september	4
2014-09-14	2014	september	2
2014-09-14	2014	september	1
2014-09-14	2014	september	7
2014-09-14	2014	september	10
2014-09-14	2014	september	12
2014-09-14	2014	september	3
2014-09-14	2014	september	14
2014-09-14	2014	september	8
2014-09-14	2014	september	30
2014-09-14	2014	september	11
2014-09-15	2014	september	26
2014-09-15	2014	september	17
2014-09-15	2014	september	20
2014-09-15	2014	september	21
2014-09-15	2014	september	15
2014-09-15	2014	september	16
2014-09-15	2014	september	9
2014-09-15	2014	september	23
2014-09-15	2014	september	24
2014-09-15	2014	september	27
2014-09-15	2014	september	2
2014-09-15	2014	september	4
2014-09-15	2014	september	1
2014-09-15	2014	september	12
2014-09-15	2014	september	7
2014-09-15	2014	september	10
2014-09-15	2014	september	3
2014-09-15	2014	september	8
2014-09-15	2014	september	14
2014-09-15	2014	september	30
2014-09-16	2014	september	11
2014-09-16	2014	september	x
2014-09-16	2014	september	24
2014-09-17	2014	september	17
2014-09-17	2014	september	26
2014-09-17	2014	september	20
2014-09-17	2014	september	21
2014-09-17	2014	september	9
2014-09-17	2014	september	16
2014-09-17	2014	september	15
2014-09-17	2014	september	27
2014-09-17	2014	september	24
2014-09-17	2014	september	23
2014-09-17	2014	september	2
2014-09-17	2014	september	4
2014-09-17	2014	september	1
2014-09-17	2014	september	10
2014-09-17	2014	september	12
2014-09-17	2014	september	7
2014-09-17	2014	september	11
2014-09-18	2014	september	24
2014-09-18	2014	september	3
2014-09-18	2014	september	14
2014-09-18	2014	september	11
2014-09-19	2014	september	1
2014-09-19	2014	september	2
2014-09-19	2014	september	4
2014-09-19	2014	september	10
2014-09-19	2014	september	7
2014-09-19	2014	september	12
2014-09-19	2014	september	3
2014-09-19	2014	september	14
2014-09-19	2014	september	15
2014-09-19	2014	september	16
2014-09-19	2014	september	27
2014-09-19	2014	september	11
2014-09-19	2014	september	x
2014-09-21	2014	september	17
2014-09-21	2014	september	26
2014-09-21	2014	september	20
2014-09-21	2014	september	21
2014-09-21	2014	september	15
2014-09-21	2014	september	16
2014-09-21	2014	september	9
2014-09-21	2014	september	27
2014-09-21	2014	september	24
2014-09-21	2014	september	23
2014-09-21	2014	september	4
2014-09-21	2014	september	2
2014-09-21	2014	september	1
2014-09-21	2014	september	12
2014-09-21	2014	september	10
2014-09-21	2014	september	7
2014-09-21	2014	september	3
2014-09-21	2014	september	14
2014-09-21	2014	september	8
2014-09-21	2014	september	30
2014-09-22	2014	september	26
2014-09-22	2014	september	17
2014-09-22	2014	september	20
2014-09-22	2014	september	21
2014-09-22	2014	september	15
2014-09-22	2014	september	16
2014-09-22	2014	september	9
2014-09-22	2014	september	23
2014-09-22	2014	september	24
2014-09-22	2014	september	27
2014-09-22	2014	september	2
2014-09-22	2014	september	4
2014-09-22	2014	september	1
2014-09-22	2014	september	x
2014-09-22	2014	september	12
2014-09-22	2014	september	7
2014-09-22	2014	september	10
2014-09-22	2014	september	3
2014-09-22	2014	september	8
2014-09-22	2014	september	14
2014-09-22	2014	september	30
2014-09-24	2014	september	17
2014-09-24	2014	september	26
2014-09-24	2014	september	20
2014-09-24	2014	september	21
2014-09-24	2014	september	9
2014-09-24	2014	september	16
2014-09-24	2014	september	15
2014-09-24	2014	september	27
2014-09-24	2014	september	24
2014-09-24	2014	september	23
2014-09-26	2014	september	12
2014-09-28	2014	september	23
2014-09-28	2014	september	24
2014-09-28	2014	september	27
2014-09-28	2014	september	9
2014-09-28	2014	september	15
2014-09-28	2014	september	16
2014-09-28	2014	september	17
2014-09-28	2014	september	20
2014-09-28	2014	september	21
2014-09-28	2014	september	26
2014-09-28	2014	september	4
[truncated: 1,060 more rows]

## Sheet: bird deaths (n=240)
Date	YEAR	MONTH	Bldg #	Side	SpeciesCode	Common Name
2013-10-19	2013	OCT	12	E	MODO	Mourning Dove
2013-10-22	2013	OCT	17	C	EATO	Eastern Towhee
2013-10-23	2013	OCT	10	D	HETH	Hermit Thrush
2013-10-27	2013	OCT	7	B	GCKI	Golden-crowned Kinglet
2013-10-28	2013	OCT	9	D	GRCA	Gray Catbird
2013-10-28	2013	OCT	11	B	unk	unknown
2013-10-28	2013	OCT	15	B	CACH	Carolina Chickadee
2013-10-28	2013	OCT	15	B	WBNU	White-breasted Nuthatch
2013-10-28	2013	OCT	20	A	unk	unknown
2013-10-31	2013	OCT	7	B	MODO	Mourning Dove
2013-11-01	2013	NOV	4	C	WTSP	White-throated Sparrow
2013-11-04	2013	NOV	11	D	FOSP	Fox Sparrow
2013-11-04	2013	NOV	11	C	unk	unknown
2013-11-05	2013	NOV	16	A	HETH	Hermit Thrush
2013-11-05	2013	NOV	16	D	SOSP	Song Sparrow
2013-11-07	2013	NOV	3	C	GCKI	Golden-crowned Kinglet
2013-11-07	2013	NOV	12	C	DEJU	Dark-eyed Junco
2013-11-08	2013	NOV	11	C	WTSP	White-throated Sparrow
2013-11-11	2013	NOV	24	C	unk	unknown
2013-11-13	2013	NOV	11	B	INBU	Indigo Bunting
2013-11-14	2013	NOV	1	B	GCKI	Golden-crowned Kinglet
2013-11-14	2013	NOV	3	B	NOCA	Northern Cardinal
2013-11-15	2013	NOV	8	C	WTSP	White-throated Sparrow
2013-11-25	2013	NOV	11	A	unk	unknown
2013-12-03	2013	DEC	16	D	DEJU	Dark-eyed Junco
2013-12-11	2013	DEC	7	D	GCKI	Golden-crowned Kinglet
2013-12-16	2013	DEC	4	A	DEJU	Dark-eyed Junco
2014-01-09	2014	JAN	7	C	GCKI	Golden-crowned Kinglet
2014-02-03	2014	FEB	1	D	EATO	Eastern Towhee
2014-02-20	2014	FEB	7	E	unk	unknown
2014-02-26	2014	FEB	24	C	RCKI	Ruby-crowned Kinglet
2014-03-12	2014	MAR	21	A	DEJU	Dark-eyed Junco
2014-03-12	2014	MAR	21	A	EABL	Eastern Bluebird
2014-03-16	2014	MAR	21	D	WTSP	White-throated Sparrow
2014-03-18	2014	MAR	1	B	AMRO	American Robin
2014-03-19	2014	MAR	11	D	AMRO	American Robin
2014-03-20	2014	MAR	16	D	SOSP	Song Sparrow
2014-03-24	2014	MAR	1	A	MODO	Mourning Dove
2014-03-24	2014	MAR	1	B	unk	unknown
2014-03-24	2014	MAR	4	C	DEJU	Dark-eyed Junco
2014-03-31	2014	MAR	2	D	AMRO	American Robin
2014-04-02	2014	APR	21	A	EUST	European Starling
2014-04-03	2014	APR	7	C	AMRO	American Robin
2014-04-04	2014	APR	23	B	DEJU	Dark-eyed Junco
2014-04-06	2014	APR	9	B	SAVS	Savannah Sparrow
2014-04-06	2014	APR	15	F	unk	unknown
2014-04-08	2014	APR	15	E	unk	unknown
2014-04-14	2014	APR	1	C	BRTH	Brown Thrasher
2014-04-14	2014	APR	4	A	AMRO	American Robin
2014-04-15	2014	APR	12	F	AMRO	American Robin
2014-04-16	2014	APR	16	A	MODO	Mourning Dove
2014-04-17	2014	APR	9	D	DEJU	Dark-eyed Junco
2014-04-17	2014	APR	21	E	unk	unknown
2014-04-18	2014	APR	4	B	AMRO	American Robin
2014-04-18	2014	APR	21	E	CEDW	Cedar Waxwing
2014-04-21	2014	APR	11	B	unk	unknown
2014-04-22	2014	APR	15	F	EABL	Eastern Bluebird
2014-04-22	2014	APR	20	B	AMRO	American Robin
2014-04-23	2014	APR	11	D	unk	unknown
2014-04-25	2014	APR	11	B	RTHU	Ruby-throated Hummingbird
2014-04-26	2014	APR	11	C	RTHU	Ruby-throated Hummingbird
2014-04-28	2014	APR	1	A	MODO	Mourning Dove
2014-04-28	2014	APR	12	C	AMGO	American Goldfinch
2014-04-28	2014	APR	14	B	RTHU	Ruby-throated Hummingbird
2014-04-29	2014	APR	2	B	YRWA	Yellow-rumped Warbler
2014-04-29	2014	APR	4	C	unk	unknown
2014-05-01	2014	MAY	11	B	GRCA	Gray Catbird
2014-05-01	2014	MAY	16	D	GRCA	Gray Catbird
2014-05-01	2014	MAY	17	B	GRCA	Gray Catbird
2014-05-05	2014	MAY	20	A	INBU	Indigo Bunting
2014-05-05	2014	MAY	21	E	RWBL	Red-winged Blackbird
2014-05-05	2014	MAY	24	A	GRCA	Gray Catbird
2014-05-05	2014	MAY	27	A	WTSP	White-throated Sparrow
2014-05-07	2014	MAY	15	A	RTHU	Ruby-throated Hummingbird
2014-05-07	2014	MAY	16	B	MODO	Mourning Dove
2014-05-07	2014	MAY	24	C	GRCA	Gray Catbird
2014-05-08	2014	MAY	7	A	AMRO	American Robin
2014-05-08	2014	MAY	12	C	AMGO	American Goldfinch
2014-05-08	2014	MAY	14	C	HETH	Hermit Thrush
2014-05-09	2014	MAY	1	B	GRCA	Gray Catbird
2014-05-09	2014	MAY	12	B	YBCU	Yellow-billed Cuckoo
2014-05-14	2014	MAY	15	G	GRCA	Gray Catbird
2014-05-14	2014	MAY	20	A	GRCA	Gray Catbird
2014-05-19	2014	MAY	1	B	NOFL	Northern Flicker
2014-05-19	2014	MAY	10	D	AMRO	American Robin
2014-05-19	2014	MAY	11	B	unk	unknown
2014-05-19	2014	MAY	12	B	RTHU	Ruby-throated Hummingbird
2014-05-21	2014	MAY	9	D	YBCU	Yellow-billed Cuckoo
2014-05-21	2014	MAY	20	B	AMGO	American Goldfinch
2014-05-26	2014	MAY	10	C	COYE	Common Yellowthroat
2014-05-29	2014	MAY	12	B	AMRE	American Redstart
2014-05-29	2014	MAY	12	F	YBCU	Yellow-billed Cuckoo
2014-05-29	2014	MAY	14	B	EUST	European Starling
2014-05-29	2014	MAY	14	D	NOCA	Northern Cardinal
2014-05-29	2014	MAY	30	B	AMGO	American Goldfinch
2014-05-29	2014	MAY	30	C	YBCU	Yellow-billed Cuckoo
2014-06-02	2014	JUN	12	B	CEDW	Cedar Waxwing
2014-06-02	2014	JUN	14	B	GCFL	Great Crested Flycatcher
2014-06-04	2014	JUN	20	A	MODO	Mourning Dove
2014-06-04	2014	JUN	24	A	HOFI	House Finch
2014-06-15	2014	JUN	9	A	SOSP	Song Sparrow
2014-06-15	2014	JUN	20	B	unk	unknown
2014-06-25	2014	JUN	20	D	unk	unknown
2014-06-25	2014	JUN	27	C	NOMO	Northern Mockingbird
2014-07-02	2014	JUL	1	B	MODO	Mourning Dove
2014-07-02	2014	JUL	12	D	AMRO	American Robin
2014-07-02	2014	JUL	12	B	GRCA	Gray Catbird
2014-07-02	2014	JUL	16	B	OVEN	Ovenbird
2014-07-07	2014	JUL	2	B	AMRO	American Robin
2014-07-07	2014	JUL	3	D	LOWA	Louisiana Waterthrush
2014-07-07	2014	JUL	10	F	AMRO	American Robin
2014-07-07	2014	JUL	12	D	OVEN	Ovenbird
2014-07-07	2014	JUL	14	B	HOFI	House Finch
2014-07-13	2014	JUL	3	C	unk	unknown
2014-07-13	2014	JUL	4	B	unk	unknown
2014-07-13	2014	JUL	10	E	NOCA	Northern Cardinal
2014-07-14	2014	JUL	2	B	unk	unknown
2014-07-14	2014	JUL	30	C	RWBL	Red-winged Blackbird
2014-07-16	2014	JUL	15	G	SOSP	Song Sparrow
2014-07-16	2014	JUL	17	C	unk	unknown
2014-07-16	2014	JUL	17	D	YTVI	Yellow-throated Vireo
2014-07-17	2014	JUL	11	A	AMRO	American Robin
2014-07-18	2014	JUL	11	B	CEDW	Cedar Waxwing
2014-07-21	2014	JUL	15	A	unk	unknown
2014-07-21	2014	JUL	15	B	unk	unknown
2014-07-21	2014	JUL	16	B	unk	unknown
2014-07-23	2014	JUL	21	C	RWBL	Red-winged Blackbird
2014-07-28	2014	JUL	3	C	AMRO	American Robin
2014-07-28	2014	JUL	30	D	SOSP	Song Sparrow
2014-07-30	2014	JUL	9	B	MODO	Mourning Dove
2014-07-30	2014	JUL	11	A	RTHU	Ruby-throated Hummingbird
2014-07-30	2014	JUL	14	B	NOFL	Northern Flicker
2014-07-30	2014	JUL	26	F	FISP	Field Sparrow
2014-08-01	2014	AUG	12	E	unk	unknown
2014-08-04	2014	AUG	3	C	AMRO	American Robin
2014-08-04	2014	AUG	3	C	unk	unknown
2014-08-04	2014	AUG	7	C	RTHU	Ruby-throated Hummingbird
2014-08-04	2014	AUG	12	B	NOCA	Northern Cardinal
2014-08-06	2014	AUG	15	G	GRCA	Gray Catbird
2014-08-06	2014	AUG	27	D	AMRO	American Robin
2014-08-20	2014	AUG	17	D	AMRO	American Robin
2014-08-20	2014	AUG	24	A	GRCA	Gray Catbird
2014-08-25	2014	AUG	2	B	NOFL	Northern Flicker
2014-08-25	2014	AUG	3	C	OVEN	Ovenbird
2014-08-26	2014	AUG	15	A	unk	unknown
2014-09-03	2014	SEPT	16	D	RTHU	Ruby-throated Hummingbird
2014-09-03	2014	SEPT	26	D	CONI	Common Nighthawk
2014-09-07	2014	SEPT	1	C	RTHU	Ruby-throated Hummingbird
2014-09-14	2014	SEPT	11	C	RTHU	Ruby-throated Hummingbird
2014-09-15	2014	SEPT	12	F	RTHU	Ruby-throated Hummingbird
2014-09-15	2014	SEPT	20	E	BTGW	Black-throated Green Warbler
2014-09-15	2014	SEPT	20	A	RTHU	Ruby-throated Hummingbird
2014-09-15	2014	SEPT	27	D	unk	unknown
2014-09-16	2014	SEPT	11	A	COYE	Common Yellowthroat
2014-09-16	2014	SEPT	11	C	RTHU	Ruby-throated Hummingbird
2014-09-17	2014	SEPT	10	D	COYE	Common Yellowthroat
2014-09-17	2014	SEPT	12	D	MODO	Mourning Dove
2014-09-17	2014	SEPT	23	D	unk	unknown
2014-09-17	2014	SEPT	27	D	unk	unknown
2014-09-18	2014	SEPT	11	B	unk	unknown
2014-09-18	2014	SEPT	14	D	YEWA	Yellow Warbler
2014-09-19	2014	SEPT	2	B	unk	unknown
2014-09-19	2014	SEPT	11	B	NOWA	Northern Waterthrush
2014-09-19	2014	SEPT	11	A	Thrush spp.	Thrush spp.
2014-09-19	2014	SEPT	14	A	BTBW	Black-throated Blue Warbler
2014-09-21	2014	SEPT	1	D	RTHU	Ruby-throated Hummingbird
2014-09-21	2014	SEPT	9	B	unk	unknown
2014-09-21	2014	SEPT	16	D	RTHU	Ruby-throated Hummingbird
2014-09-21	2014	SEPT	16	D	unk	unknown
2014-09-21	2014	SEPT	17	A/B	NOMO	Northern Mockingbird
2014-09-21	2014	SEPT	20	B	CEDW	Cedar Waxwing
2014-09-22	2014	SEPT	1	B	SCTA	Scarlet Tanager
2014-09-22	2014	SEPT	12	C	RTHU	Ruby-throated Hummingbird
2014-09-22	2014	SEPT	30	C	PAWA	Palm Warbler
2014-09-24	2014	SEPT	2	D	BTGW	Black-throated Green Warbler
2014-09-24	2014	SEPT	15	A	RTHU	Ruby-throated Hummingbird
2014-09-24	2014	SEPT	16	D	RTHU	Ruby-throated Hummingbird
2014-09-24	2014	SEPT	20	A	AMGO	American Goldfinch
2014-09-26	2014	SEPT	12	E	RTHU	Ruby-throated Hummingbird
2014-09-28	2014	SEPT	3	C	YBCU	Yellow-billed Cuckoo
2014-09-28	2014	SEPT	12	B	RTHU	Ruby-throated Hummingbird
2014-09-28	2014	SEPT	12	B	TEWA	Tennessee Warbler
2014-10-03	2014	OCT	11	C	RTHU	Ruby-throated Hummingbird
2014-10-05	2014	OCT	3	C	RTHU	Ruby-throated Hummingbird
2014-10-05	2014	OCT	3	B	unk	unknown
2014-10-05	2014	OCT	12	B	CSWA	Chestnut-sided Warbler
2014-10-13	2014	OCT	20	B	REVI	Red-eyed Vireo
2014-10-15	2014	OCT	11	D	GRCA	Gray Catbird
2014-10-15	2014	OCT	12	B	TUTI	Tufted Titmouse
2014-10-19	2014	OCT	1	D	MODO	Mourning Dove
2014-10-19	2014	OCT	10	E	woodpecker spp	woodpecker spp
2014-10-22	2014	OCT	12	F	AMRO	American Robin
2014-10-23	2014	OCT	24	A	WTSP	White-throated Sparrow
2014-10-29	2014	OCT	12	F	AMRO	American Robin
2014-10-30	2014	OCT	23	D	YBSA	Yellow-bellied Sapsucker
2014-11-03	2014	NOV	11	C	BHVI	Blue-headed Vireo
2014-11-03	2014	NOV	12	D	GCKI	Golden-crowned Kinglet
2014-11-04	2014	NOV	7	C	BRCR	Brown Creeper
2014-11-04	2014	NOV	7	C	GCKI	Golden-crowned Kinglet
2014-11-10	2014	NOV	7	C	GCKI	Golden-crowned Kinglet
2014-11-10	2014	NOV	12	D	DEJU	Dark-eyed Junco
2014-11-10	2014	NOV	30	C	WTSP	White-throated Sparrow
2014-11-12	2014	NOV	2	D	CEDW	Cedar Waxwing
2014-11-12	2014	NOV	21	A	unk	unknown
2014-11-18	2014	NOV	15	C	HOFI	House Finch
2014-11-19	2014	NOV	3	C	unk	unknown
2014-11-19	2014	NOV	3	C	unk	unknown
2014-11-21	2014	NOV	3	C	GCKI	Golden-crowned Kinglet
2014-11-21	2014	NOV	7	D	MODO	Mourning Dove
2014-11-21	2014	NOV	12	D	DEJU	Dark-eyed Junco
2014-11-30	2014	NOV	27	B	HETH	Hermit Thrush
2014-12-01	2014	DEC	11	A	AMWO	American Woodcock
2014-12-01	2014	DEC	30	C	AMPI	American Pipit
2014-12-02	2014	DEC	20	E	WCSP	White-crowned Sparrow
2014-12-02	2014	DEC	20	A	WTSP	White-throated Sparrow
2014-12-02	2014	DEC	21	C	unk	unknown
2014-12-24	2014	DEC	12	B	WTSP	White-throated Sparrow
2015-01-13	2015	JAN	2	C	YBSA	Yellow-bellied Sapsucker
2015-01-14	2015	JAN	30	A	NOCA	Northern Cardinal
2015-01-29	2015	JAN	16	A	MODO	Mourning Dove
2015-02-12	2015	FEB	20	A	MODO	Mourning Dove
2015-03-20	2015	MAR	7	A	AMRO	American Robin
2015-03-22	2015	MAR	15	G	SOSP	Song Sparrow
2015-03-29	2015	MAR	16	D	CEDW	Cedar Waxwing
2015-04-13	2015	APR	11	B	unk	unknown
2015-04-27	2015	APR	10	E	BRTH	Brown Thrasher
2015-04-28	2015	APR	11	A	RTHU	Ruby-throated Hummingbird
2015-04-28	2015	APR	11	B	unk	unknown
2015-05-04	2015	MAY	1	A	GRCA	Gray Catbird
2015-05-04	2015	MAY	14	A	EAKI	Easterm Kingbird
2015-05-04	2015	MAY	14	A	EAKI	Easterm Kingbird
2015-05-06	2015	MAY	14	B	RCKI	Ruby-crowned Kinglet
2015-05-06	2015	MAY	14	B	WOWA	Worm-eating Warbler
2015-05-13	2015	MAY	12	F	GRCA	Gray Catbird
2015-05-13	2015	MAY	14	B	RTHU	Ruby-throated Hummingbird
2015-05-20	2015	MAY	7	C	KILL	Killdeer
2015-05-20	2015	MAY	7	E	NOFL	Northern Flicker
2015-05-27	2015	MAY	7	E/A	CEDW	Cedar Waxwing
2015-05-27	2015	MAY	7	E/A	unk	unknown
2015-05-27	2015	MAY	31	C	INBU	Indigo Bunting

## Sheet: land cover
BuildingNumber	BirdDeaths	ForestArea	GrassArea	ImperviousArea	WaterArea	TreeArea	TotalArea (m2)
1	15	840	4391	5966	0	3721	14917.1
2	9	0	5569	7369	0	2002	14939.5
3	14	1714	4593	11427	0	2673	20406.4
4	7	0	5540	8650	0	2336	16525.9
7	17	0	5043	12386	0	755	18184.4
8	1	0	2680	9112	0	1105	12897
9	7	0	6645	8176	0	1352	16173.7
10	8	1923	4539	9263	0	2071	17796.2
11	29	4065	2693	5167	0	4223	16147.6
12	30	0	5563	11030	0	222	16815
14	14	561	4693	9848	0	1257	16358.7
15	15	0	9573	11598	0	4246	25417.6
16	15	0	5211	6935	0	3434	15580.1
17	6	0	8345	8727	0	835	17907.2
20	16	0	6569	9315	693	1139	17716.6
21	10	0	5637	7826	3277	914	17654.6
23	3	0	6642	6531	0	3140	16312.9
24	7	1688	7828	13255	0	480	23251.4
26	2	0	13587	8153	0	1480	23219.9
27	6	0	6293	8092	0	1974	16358.8
30	8	0	9382	8368	0	67	17816.8
31	1	0	7111	10914	0	0	18024.9

## Sheet: window area
Buidling Number	Building Side	image #		Area	Number of windows this size	Total (SQ INCHES)	Total (SQ METERS)
1	A	5841	1	1641.32	5	8206.58	5.29456
			2	604.658	4	2418.63	1.5604
			3	700.214	1	700.214	0.45175
	B	5824	1	1542.16	16	24674.5	15.919
			2	700.214	9	6301.93	4.06575
			3	767.291	16	12276.7	7.92041
			4	2298.2	16	36771.3	23.7234
			5	416.634	9	3749.71	2.41916
			6	1012.47	9	9112.23	5.87885
		5828	1	1133.45	1	1133.45	0.731259
			2	2180.54	1	2180.54	1.4068
			3	2331.27	1	2331.27	1.50404
			4	994.891	3	2984.67	1.92559
			5	2414.18	5	12070.9	7.78766
			6	827.453	4	3309.81	2.13536
			7	463.916	2	927.832	0.5986
			8	2800.82	4	11203.3	7.22791
			9	1370.1	2	2740.21	1.76787
	C	5831	1	1168.53	6	7011.19	4.52334
			2	544.048	2	1088.1	0.701996
	D	5834	1	593.757	1	593.757	0.383068
			2	857.688	1	857.688	0.553346
			3	815.942	1	815.942	0.526413
			4	765.226	1	765.226	0.493693
			5	830.95	1	830.95	0.536096
			6	648.441	1	648.441	0.418348
			7	2913.76	1	2913.76	1.87984
			8	908.576	1	908.576	0.586177
			9	593.067	1	593.067	0.382623
			10	2449.38	1	2449.38	1.58024
			11	926.172	1	926.172	0.597529
			12	2458.18	1	2458.18	1.58592
			13	586.34	1	586.34	0.378283
			14	4395.91	1	4395.91	2.83606
			15	4348.47	1	4348.47	2.80546
			16	3549.09	1	3549.09	2.28973
			17	1236.51	13	16074.6	10.3707
			18	2660.01	26	69160.1	44.6193
			19	548.389	9	4935.5	3.18419
			20	1014.15	16	16226.4	10.4686
			21	1222.7	9	11004.3	7.09956
			22	2721.42	16	43542.7	28.092
TOTAL 1							219.211
2	A	5865	1	1141.87	5	5709.36	3.68345
			2	501.268	4	2005.07	1.29359
			3	700.214	1	700.214	0.45175
	B	5844	1	1161.49	1	1161.49	0.749347
			2	2138.43	1	2138.43	1.37963
			3	2212.05	1	2212.05	1.42713
			4	937.464	3	2812.39	1.81444
			5	2051.07	5	10255.4	6.61636
			6	431.048	2	862.096	0.55619
			7	840.098	4	3360.39	2.16799
			8	1504.41	2	3008.82	1.94117
			9	3235.28	4	12941.1	8.3491
		5846	1	748.882	9	6739.94	4.34834
			2	1606.33	16	25701.3	16.5815
			3	353.258	9	3179.32	2.05117
			4	640.097	16	10241.6	6.60744
			5	913.872	9	8224.85	5.30634
			6	2004.05	16	32064.8	20.6869
	C	5843	1	451.763	2	903.526	0.582919
			2	1098.64	6	6591.83	4.25278
	D	5866	1	885.262	13	11508.4	7.42476
			2	1983.29	26	51565.5	33.268
			3	437.366	9	3936.29	2.53954
			4	804.333	16	12869.3	8.30278
			5	1151.09	9	10359.8	6.68373
			6	2519.64	16	40314.3	26.0092
		5870	1	648.361	6	3890.17	2.50978
			2	2964.75	1	2964.75	1.91274
			3	423.271	1	423.271	0.273078
			4	2250.86	1	2250.86	1.45216
			5	2229.91	1	2229.91	1.43865
			6	444.592	1	444.592	0.286833
			7	730.924	1	730.924	0.471563
			8	728.057	1	728.057	0.469713
			9	3616.94	1	3616.94	2.33351
			10	3525.04	1	3525.04	2.27422
			11	3473.1	1	3473.1	2.24071
TOTAL 2							190.738
4	A	5851	1	3758.11	1	3758.11	2.42458
			2	1332.73	1	1332.73	0.859822
			3	2074.87	1	2074.87	1.33862
			4	1083.67	1	1083.67	0.699143
			5	1841.99	1	1841.99	1.18838
			6	917.594	1	917.594	0.591995
			7	2701.67	1	2701.67	1.74301
			8	963.092	1	963.092	0.621348
		5852	1	2825.35	1	2825.35	1.8228
			2	967.073	1	967.073	0.623917
			3	1763.35	1	1763.35	1.13764
			4	938.301	1	938.301	0.605354
			5	2665.13	1	2665.13	1.71943
			6	2936.07	1	2936.07	1.89423
			7	1048.9	1	1048.9	0.67671
		5853	1	2437.52	1	2437.52	1.57259
			2	833.487	1	833.487	0.537732
			3	1574.1	1	1574.1	1.01555
			4	787.903	1	787.903	0.508323
			5	1583.28	1	1583.28	1.02147
			6	781.139	1	781.139	0.50396
			7	2659.17	1	2659.17	1.71559
			8	909.924	1	909.924	0.587047
	B	5854	1	3080.59	1	3080.59	1.98748
			2	1037.38	1	1037.38	0.669274
			3	2227.99	1	2227.99	1.43741
			4	1040.58	1	1040.58	0.671338
		5856	1	1851.52	1	1851.52	1.19452
			2	914.375	1	914.375	0.589918
			3	2874.38	1	2874.38	1.85443
			4	960.094	1	960.094	0.619414
			5	1900.54	1	1900.54	1.22615
		5858	1	3208.91	1	3208.91	2.07026
			2	1075.38	1	1075.38	0.693789
			3	2823.16	1	2823.16	1.82139
			4	2852.08	1	2852.08	1.84005
			5	3136.29	1	3136.29	2.02341
			6	1024.13	1	1024.13	0.660728
	C	5859	1	3157.2	2	6314.4	4.0738
			2	2994.23	2	5988.46	3.86351
			3	1943.72	2	3887.44	2.50802
			4	1878.46	2	3756.93	2.42382
			5	911.075	2	1822.15	1.17558
			6	933.142	2	1866.28	1.20405
			7	1038.95	2	2077.91	1.34058
			8	984.763	2	1969.53	1.27066
		5860	1	3216.29	1	3216.29	2.07502
			2	1059.06	1	1059.06	0.68326
			3	2825.66	1	2825.66	1.823
			4	2819.85	1	2819.85	1.81925
			5	2915.65	1	2915.65	1.88106
			6	1027.22	1	1027.22	0.662719
		5861	1	2816.67	2	5633.34	3.63441
			2	1036.68	2	2073.35	1.33764
			3	1652.78	2	3305.56	2.13261
			4	582.499	2	1165	0.75161
		5862	1	2920.41	1	2920.41	1.88413
			2	1010.47	1	1010.47	0.651916
			3	2678.44	1	2678.44	1.72802
			4	2730.76	1	2730.76	1.76177
			5	2977.13	1	2977.13	1.92072
			6	1005.91	1	1005.91	0.648973
	D	5849	1	704.722	4	2818.89	1.81863
TOTAL 4							89.8436
11	A	2097	1	3998.7	24	95968.7	61.9152
			2	2705.51	6	16233	10.4729
			3	584.325	6	3505.95	2.2619
	C	2109	1	3998.7	24	95968.7	61.9152
			2	2705.51	6	16233	10.4729
			3	584.325	6	3505.95	2.2619
	D	2102	1	3604.61	40	144184	93.022
			2	2358.75	8	18870	12.1742
			3	508.908	8	4071.26	2.62662
	B	2124	1	1528.53	1	1528.53	0.986149
			2	1641.19	1	1641.19	1.05883
			3	985.644	1	985.644	0.635898
			4	1067.92	1	1067.92	0.688978
			5	963.364	1	963.364	0.621524
			6	1027.95	1	1027.95	0.663191
			7	1469.91	1	1469.91	0.948328
			8	1515.21	1	1515.21	0.977553
			9	3284.53	1	3284.53	2.11905
		2129	1	3183.34	32	101867	65.7204
			2	1912.24	8	15297.9	9.86962
			3	441.194	8	3529.55	2.27713
		2117	1	587.603	4	2350.41	1.51639
			2	1152.44	4	4609.76	2.97403
			3	957.834	4	3831.34	2.47182
			4	1100.92	4	4403.68	2.84108
			5	1852.91	4	7411.66	4.78171
			6	1515.55	4	6062.2	3.91109
			7	1547.46	4	6189.85	3.99344
			8	863.406	10	8634.06	5.57035
			9	1677.17	10	16771.7	10.8204
			10	1419.48	10	14194.8	9.15794
			11	1687.85	10	16878.5	10.8894
			12	2893.59	10	28935.9	18.6683
			13	2251.24	10	22512.4	14.5241
			14	2424.1	10	24241	15.6393
TOTAL 11							451.449
7	A	2232&2234	1	2016.13	3	6048.38	3.90218
			2	2221.68	3	6665.06	4.30003
			3	1339.46	3	4018.38	2.5925
			4	1966.22	3	5898.65	3.80557
			5	1510.5	3	4531.49	2.92353
			6	623.88	3	1871.64	1.20751
		5766&5768	1	659.183	42	27685.7	17.8617
			2	887.653	122	108294	69.8667
			3	553.978	2	1107.96	0.714809
			4	2300.53	2	4601.06	2.96842
		5775	1	440.476	2	880.952	0.568355
			2	574.16	2	1148.32	0.74085
			3	498.298	2	996.596	0.642964
			4	722.308	2	1444.62	0.932008
			5	697.366	2	1394.73	0.899825
			6	1018.77	1	1018.77	0.657271
			7	1216.7	2	2433.4	1.56993
			8	1882.76	2	3765.53	2.42937
			9	1560.45	2	3120.91	2.01349
			10	693.388	2	1386.78	0.894692
		5777	1	779.941	4	3119.76	2.01275
			2	1834.88	4	7339.5	4.73515
			3	2231.36	4	8925.44	5.75834
			4	1485.37	4	5941.47	3.8332
			5	2628.28	4	10513.1	6.78264
			6	2392.02	4	9568.09	6.17295
		5778	1	659.183	16	10546.9	6.80446
			2	887.653	38	33730.8	21.7618
	B	5763	1	659.183	24	15820.4	10.2067
			2	887.653	56	49708.6	32.07
			1	2016.13	9	18145.2	11.7065
			2	2221.68	9	19995.2	12.9001
			3	1339.46	9	12055.1	7.77749
			4	1966.22	9	17696	11.4167
			5	1510.5	9	13594.5	8.7706
			6	623.88	9	5614.92	3.62252
			1	448.12	1	448.12	0.289109
			2	537.543	1	537.543	0.346801
			3	421.293	1	421.293	0.271801
			4	1258.01	1	1258.01	0.81162
			5	1214.39	1	1214.39	0.783479
			6	861.109	1	861.109	0.555553
			7	178.106	1	178.106	0.114907
			8	1041.89	1	1041.89	0.672186
			9	1057.72	2	2115.45	1.3648
			10	1577.33	2	3154.66	2.03526
			11	1197.02	2	2394.03	1.54453
			12	484.726	2	969.452	0.625452
	C	2223	1	676.173	6	4057.04	2.61744
			2	1614.69	6	9688.12	6.25039
			3	2063.91	6	12383.5	7.98933
			4	1406.56	6	8439.34	5.44473
			5	2265.51	6	13593.1	8.76971
			6	2020.59	6	12123.6	7.82164
		2235	1	676.173	2	1352.35	0.87248
			2	1614.69	2	3229.37	2.08346
			3	2063.91	2	4127.83	2.66311
			4	1406.56	2	2813.11	1.81491
			5	2265.51	2	4531.03	2.92324
			6	2020.59	2	4041.19	2.60721
		2239&2225	1	530.461	2	1060.92	0.684464
			2	653	2	1306	0.842579
			3	528.576	2	1057.15	0.682032
			4	616.438	2	1232.88	0.795402
			5	747.761	1	747.761	0.482425
			6	1702.12	1	1702.12	1.09814
			7	1970.95	1	1970.95	1.27158
			8	1262.36	1	1262.36	0.814421
			9	2030.57	1	2030.57	1.31004
			10	1809.85	1	1809.85	1.16765
			11	636.562	14	8911.87	5.74958
			12	1348.59	14	18880.2	12.1808
			13	2394.73	14	33526.2	21.6298
			14	1928.25	14	26995.5	17.4164
			15	1072.96	14	15021.5	9.69125
			15	1072.96	14	15021.5	9.69125
			16	1934.11	14	27077.5	17.4693
			17	839.194	14	11748.7	7.5798
			18	3018.25	1	3018.25	1.94726
			19	2547.46	1	2547.46	1.64352
			20	1104.42	1	1104.42	0.712531
			21	1928.25	1	1928.25	1.24403
		5796&5792	1	659.183	30	19775.5	12.7584
			2	887.653	56	49708.6	32.07
	D	5781&5782	1	659.183	50	32959.2	21.2639
			2	887.653	122	108294	69.8667
		5783	1	485.482	1	485.482	0.313214
			2	601.561	1	601.561	0.388103
			3	505.267	1	505.267	0.325978
			4	1193.71	1	1193.71	0.770137
			5	1310.5	1	1310.5	0.84548
			6	558.287	1	558.287	0.360184
	E	5780	1	659.183	19	12524.5	8.08029
			2	887.653	43	38169.1	24.6252
			3	622.162	1	622.162	0.401394
			4	531.314	1	531.314	0.342783
			5	657.024	1	657.024	0.423886
			6	531.77	1	531.77	0.343077
TOTAL 7							628.38
31	A	2134	1	364.596	30	10937.9	7.05668
			2	1398.52	30	41955.7	27.0681
			3	578.705	26	15046.3	9.70729
			4	2195.32	26	57078.2	36.8246
		2252	1	1748.13	1	1748.13	1.12783
			2	1712.54	1	1712.54	1.10486
			3	1129.34	1	1129.34	0.728604
		2254	1	558.75	1	558.75	0.360483
			2	2494.13	1	2494.13	1.60911
			3	2878.23	1	2878.23	1.85692
			4	909.853	1	909.853	0.587001
			5	4202.89	1	4202.89	2.71154
			6	4870.78	1	4870.78	3.14243
			7	715.195	1	715.195	0.461415
			8	260.108	1	260.108	0.167811
			9	1189.9	1	1189.9	0.767677
			10	1409.41	1	1409.41	0.909294
			11	939.957	1	939.957	0.606423
			12	2011.11	1	2011.11	1.29749
			13	1944.07	1	1944.07	1.25423
			14	459.481	1	459.481	0.296439
			15	4988.11	1	4988.11	3.21813
			16	2386.77	1	2386.77	1.53985
			17	1247.82	1	1247.82	0.805046
			18	4433.28	1	4433.28	2.86017
			19	2087.57	1	2087.57	1.34682
		2255	1	2365.12	1	2365.12	1.52588
			2	4170.13	1	4170.13	2.6904
			3	5051	1	5051	3.2587
		2256	1	3234.39	1	3234.39	2.0867
			2	2426.17	1	2426.17	1.56527
			3	2688.7	1	2688.7	1.73464
			4	2003.12	1	2003.12	1.29233
			5	1531.22	1	1531.22	0.987884
			6	1137.15	1	1137.15	0.733641
		2258	1	1852.1	1	1852.1	1.1949
			2	3386.26	1	3386.26	2.18468
			3	2627.34	1	2627.34	1.69506
			4	4750.38	1	4750.38	3.06475
			5	3446.61	1	3446.61	2.22362
			6	1199.56	1	1199.56	0.773909
			7	624.543	1	624.543	0.40293
	B		1	364.596	20	7291.92	4.70446
			2	1398.52	20	27970.5	18.0454
			3	578.705	18	10416.7	6.72043
			4	2195.32	18	39515.7	25.4939
	C	2144	1	792.769	1	792.769	0.511463
			2	753.343	1	753.343	0.486027
			3	1656.83	1	1656.83	1.06892
			4	1821.36	1	1821.36	1.17507
			5	3811.89	1	3811.89	2.45928
		2247	1	3263.21	1	3263.21	2.10529
			2	2916.13	1	2916.13	1.88137
		2248	1	1042.51	5	5212.55	3.36293
			2	3528.53	5	17642.6	11.3823
			3	6243.87	5	31219.4	20.1415
			4	3665.46	5	18327.3	11.824
			5	1155.86	5	5779.3	3.72857
			6	3319.14	5	16595.7	10.7069
			7	2915.64	5	14578.2	9.40527
			8	1647.4	5	8236.99	5.31418
		2249	1	502.708	1	502.708	0.324327
			2	2419.79	1	2419.79	1.56115
			3	6814.36	1	6814.36	4.39636
			4	4093.22	1	4093.22	2.64078
			5	2853.81	1	2853.81	1.84116
			6	4035.83	1	4035.83	2.60376
			7	2834.57	1	2834.57	1.82875
			8	1957.93	1	1957.93	1.26318
			9	1398.72	1	1398.72	0.902396
		2250	1	6688.2	1	6688.2	4.31496
			2	4692.41	1	4692.41	3.02736
			3	2944.26	1	2944.26	1.89952
			4	4150.01	1	4150.01	2.67742
			5	3085.89	1	3085.89	1.99089
			6	4374.44	1	4374.44	2.82221
			7	2299.83	1	2299.83	1.48376
			8	1621.8	1	1621.8	1.04632
		brick	1	364.596	8	2916.77	1.88178
			2	1398.52	8	11188.2	7.21817
			3	578.705	8	4629.64	2.98686
			4	2195.32	8	17562.5	11.3306
	D	2130	1	1173.73	1	1173.73	0.757244
			2	2362.81	1	2362.81	1.52439
			1	364.596	6	2187.58	1.41134
			2	1398.52	6	8391.14	5.41363
			3	578.705	6	3472.23	2.24014
			4	2195.32	6	13171.9	8.49798
		2246	1	964.854	8	7718.83	4.97988
			2	5068.06	8	40544.5	26.1577
			3	1914.96	8	15319.7	9.88367
			4	3046.36	8	24370.8	15.7231
TOTAL 31							413.98
9	A	2339		3554.54	24	85309	55.0379
				2434.13	12	29209.5	18.8448
				849.22	12	10190.6	6.57459
	B	2331		3554.54	16	56872.6	36.692
				2434.13	8	19473	12.5632
				849.22	8	6793.76	4.38306
	B	2332		1490.95	3	4472.86	2.88571
				1687.89	3	5063.67	3.26688
				2988.61	3	8965.84	5.7844
				2198.71	3	6596.14	4.25557
				2198.71	3	6596.14	4.25557
	B	2333		4360.05	12	52320.6	33.7552
				6286.47	12	75437.6	48.6693
				4072.2	12	48866.4	31.5266
	B	2334		940.425	2	1880.85	1.21345
				2092.49	2	4184.99	2.69999
				2073.99	2	4147.98	2.67611
				417.981	13	5433.75	3.50564
				2039.56	2	4079.12	2.63169
	B	2335		2836.29	1	2836.29	1.82986
				2834.5	1	2834.5	1.8287
				1323.51	1	1323.51	0.853874
	B	2336		3154.97	1	3154.97	2.03546
				1510.77	1	1510.77	0.974689
	B	2337		3554.54	18	63981.7	41.2784
				2434.13	8	19473	12.5632
				849.22	8	6793.76	4.38306
	C	2353		3554.54	24	85309	55.0379
				2434.13	12	29209.5	18.8448
				849.22	12	10190.6	6.57459
	D	2341		3554.54	16	56872.6	36.692
				2434.13	8	19473	12.5632
				849.22	8	6793.76	4.38306
	D	2344		1490.95	3	4472.86	2.88571
				1687.89	3	5063.67	3.26688
				2988.61	3	8965.84	5.7844
				2198.71	3	6596.14	4.25557
				2198.71	3	6596.14	4.25557
		2346		3154.97	1	3154.97	2.03546
				1510.77	1	1510.77	0.974689
		2347		940.425	2	1880.85	1.21345
				2092.49	2	4184.99	2.69999
				2073.99	2	4147.98	2.67611
				417.981	13	5433.75	3.50564
				2039.56	2	4079.12	2.63169
		2348		2836.29	1	2836.29	1.82986
				2834.5	1	2834.5	1.8287
				1323.51	1	1323.51	0.853874
		2349		4360.05	12	52320.6	33.7552
				6286.47	12	75437.6	48.6693
				4072.2	12	48866.4	31.5266
		2351		3554.54	18	63981.7	41.2784
				2434.13	8	19473	12.5632
				849.22	8	6793.76	4.38306
TOTAL 9							693.938
30	A	2165	1	3189.88	1	3189.88	2.05798
			2	1740.83	1	1740.83	1.12312
			3	1678.12	1	1678.12	1.08266
			4	536.659	1	536.659	0.346231
			5	2545.2	1	2545.2	1.64206
			6	2466.94	1	2466.94	1.59157
			7	598.821	1	598.821	0.386335
			8	604.093	1	604.093	0.389737
			9	196.534	1	196.534	0.126796
		2160	1	2204.73	30	66141.9	42.6721
			2	1545.81	34	52557.6	33.908
			3	442.637	34	15049.7	9.70944
		2167	1	3915.39	1	3915.39	2.52605
			2	3503.02	1	3503.02	2.26001
			3	3155.5	1	3155.5	2.0358
			4	2753.7	1	2753.7	1.77658
			5	2360.57	1	2360.57	1.52295
			6	2065.99	1	2065.99	1.3329
			7	1432.99	1	1432.99	0.924507
	B	2154	1	5354.29	5	26771.5	17.2719
		2156	1	2427.98	22	53415.5	34.4615
		2159	1	1730.18	2	3460.37	2.23249
			2	552.865	2	1105.73	0.713373
			3	2621.54	10	26215.4	16.9131
			4	1897.5	10	18975	12.2419
	C		1	2708.15	21	56871.1	36.691
			2	1895.56	21	39806.7	25.6817
			3	579.087	21	12160.8	7.84568
		6078	1	665.449	1	665.449	0.429321
			2	679.205	1	679.205	0.438196
			3	243.038	1	243.038	0.156798
			4	2373.5	1	2373.5	1.53129
			5	2343.06	1	2343.06	1.51165
			6	3384.27	1	3384.27	2.18339
			7	3536.69	1	3536.69	2.28173
			8	1236.89	1	1236.89	0.797992
			9	661.081	6	3966.49	2.55902
			10	2576.25	6	15457.5	9.97255
			11	2017.21	6	12103.3	7.80855
			12	1261.38	6	7568.28	4.88275
		6079	1	3427.96	8	27423.7	17.6927
			2	523.716	8	4189.73	2.70304
			5	581.374	10	5813.74	3.75079
	D	2147	1	2708.15	18	48746.7	31.4494
			2	1895.56	18	34120	22.0129
			3	579.087	18	10423.6	6.72487
TOTAL 30							380.354
3	A	2267		775.153	8	6201.22	4.00078
				1437.5	16	23000	14.8387
	B	2262		1000.92	12	12011	7.74901
				1365.14	24	32763.4	21.1376
		2263		1400.26	1	1400.26	0.903392
				1441.59	1	1441.59	0.930053
				1332.44	1	1332.44	0.859636
				927.442	1	927.442	0.598348
				314.945	1	314.945	0.20319
		2264		727.599	7	5093.19	3.28592
				1272.21	8	10177.7	6.56625
		2265		1918.31	1	1918.31	1.23762
				301.831	1	301.831	0.194729
				43.022	1	43.022	0.0277561
		2266		364.151	1	364.151	0.234936
				531.694	1	531.694	0.343028
				1138.36	3	3415.09	2.20328
	C	6043		1000.92	108	108099	69.7411
				1365.14	108	147435	95.1194
	D	2268		1977.1	4	7908.39	5.10218
				1594.7	8	12757.6	8.23068
				1721.24	14	24097.4	15.5467
		2269		1977.1	2	3954.2	2.55109
				1594.7	2	3189.4	2.05767
				1721.24	4	6884.98	4.44191
		2271		1300.01	2	2600.03	1.67743
				1218.1	1	1218.1	0.785871
				1977.1	2	3954.2	2.55109
				1594.7	2	3189.4	2.05767
				1721.24	4	6884.98	4.44191
		2272		1026.05	2	2052.1	1.32393
				1019.43	2	2038.85	1.31539
				1027.97	2	2055.95	1.32641
				1417.47	4	5669.88	3.65798
				1415.74	4	5662.98	3.65353
				1394.75	4	5579	3.59935
TOTAL 3							294.496
8	A	NONE				0	0
	B	2203		576	6	3456	2.22967
	C	2301&2302		576	26	14976	9.66192
	D	2273		711.016	1	711.016	0.458719
				1950.12	1	1950.12	1.25814
				576	4	2304	1.48645
		2274		711.016	1	711.016	0.458719
				1950.12	1	1950.12	1.25814
				576	4	2304	1.48645
TOTAL 8							18.2982
17	A	2178		353.17	5	1765.85	1.13926
				858.846	5	4294.23	2.77047
				612.464	5	3062.32	1.97569
				1442.69	5	7213.47	4.65384
		2179		3078.79	60	184728	119.179
	B	2170		353.17	6	2119.02	1.36711
				858.846	6	5153.08	3.32456
				612.464	6	3674.78	2.37082
				1442.69	6	8656.16	5.58461
				3308.53	12	39702.3	25.6144
	C	2172		2457.73	3	7373.18	4.75688
				3767.57	3	11302.7	7.29207
		2173		353.17	18	6357.06	4.10132
				858.846	18	15459.2	9.97368
				612.464	18	11024.4	7.11247
				1442.69	18	25968.5	16.7538
		2174		788.976	8	6311.81	4.07213
				1693.05	8	13544.4	8.73828
				4089.51	2	8179.02	5.27678
				353.17	2	706.34	0.455702
				858.846	2	1717.69	1.10819
				612.464	2	1224.93	0.790275
				1442.69	2	2885.39	1.86154
		2176		353.17	5	1765.85	1.13926
				858.846	5	4294.23	2.77047
				612.464	5	3062.32	1.97569
				1442.69	5	7213.47	4.65384
	D	2177		1225.39	1	1225.39	0.790572
				1192.87	1	1192.87	0.769592
				2528.76	1	2528.76	1.63146
				1106.87	1	1106.87	0.71411
				1023.34	1	1023.34	0.660219
				2530.76	4	10123.1	6.53099
				1308.77	4	5235.07	3.37746
				353.17	5	1765.85	1.13926
				858.846	5	4294.23	2.77047
				612.464	5	3062.32	1.97569
				1442.69	5	7213.47	4.65384
				3308.53	5	16542.6	10.6727
TOTAL 17							286.498
26	A	2198		849.122	1	849.122	0.54782
				1437.79	1	1437.79	0.927603
				2565.05	1	2565.05	1.65487
				1871.01	1	1871.01	1.2071
				584.394	1	584.394	0.377028
				1169.14	6	7014.87	4.52571
				1660.75	6	9964.49	6.42869
				503.706	6	3022.24	1.94983
				345.653	6	2073.92	1.33801
				1501.15	6	9006.91	5.8109
				411.153	6	2466.92	1.59156
				411.153	6	2466.92	1.59156
	B	2193		2087.14	1	2087.14	1.34654
				1273.11	1	1273.11	0.82136
				3687.76	1	3687.76	2.37919
				712.787	1	712.787	0.459862
				1289.11	1	1289.11	0.831679
				774.64	1	774.64	0.499767
				6243.74	1	6243.74	4.02821
				18302.1	1	18302.1	11.8078
				502.724	1	502.724	0.324337
		2194&2195		621.298	18	11183.4	7.21506
				1011.51	18	18207.2	11.7466
				1792.56	18	32266	20.8167
		2196		596.382	12	7156.58	4.61714
				1781.24	12	21374.9	13.7902
				1234.64	12	14815.6	9.55846
				419.045	12	5028.54	3.24421
	C	2190+similar for 2191		596.382	9	5367.44	3.46286
				1781.24	9	16031.1	10.3427
				1234.64	9	11111.7	7.16885
				419.045	9	3771.41	2.43316
		2191		393.842	1	393.842	0.254091
				1131.92	1	1131.92	0.730271
				1154.16	1	1154.16	0.744619
				3362.5	1	3362.5	2.16935
				306.321	1	306.321	0.197626
				918.764	1	918.764	0.59275
				306.321	1	306.321	0.197626
				918.764	1	918.764	0.59275
				1048.92	1	1048.92	0.676723
				3042.57	1	3042.57	1.96294
				2164.61	1	2164.61	1.39652
				715.075	1	715.075	0.461338
		2192		1257.09	1	1257.09	0.811021
				3688.01	1	3688.01	2.37936
				617.897	1	617.897	0.398642
				1697.11	1	1697.11	1.09491
				4254.01	9	38286.1	24.7007
				1284.59	9	11561.3	7.45888
				426.569	9	3839.12	2.47685
				1359.99	9	12239.9	7.89672
	D	2187		621.298	15	9319.47	6.01255
				1011.51	15	15172.7	9.78881
				1792.56	15	26888.3	17.3473
		2188		596.382	6	3578.29	2.30857
				1781.24	6	10687.4	6.8951
				1234.64	6	7407.82	4.77923
				419.045	6	2514.27	1.62211
		2189		1829.37	1	1829.37	1.18023
				612.519	1	612.519	0.395173
				1418.29	1	1418.29	0.915021
				506.384	1	506.384	0.326699
				860.579	1	860.579	0.555211
	E	2183		393.842	1	393.842	0.254091
				1131.92	1	1131.92	0.730271
				1154.16	1	1154.16	0.744619
				3362.5	1	3362.5	2.16935
		2184		151.554	1	151.554	0.0977766
				1441.18	1	1441.18	0.929789
				773.366	1	773.366	0.498945
				1313.12	1	1313.12	0.847171
				1908.21	2	3816.41	2.4622
				512.831	4	2051.32	1.32343
				2460.27	4	9841.09	6.34908
				828.507	4	3314.03	2.13808
				1367.44	4	5469.75	3.52886
		2185		367.688	6	2206.13	1.42331
				1777.17	6	10663	6.87935
				627.222	6	3763.33	2.42795
				1035.33	6	6211.95	4.0077
		2186		596.382	15	8945.73	5.77143
				1781.24	15	26718.6	17.2378
				1234.64	15	18519.6	11.9481
				419.045	15	6285.68	4.05527
	F	2182		621.298	30	18638.9	12.0251
				1011.51	30	30345.4	19.5776
				1792.56	30	53776.7	34.6946
TOTAL 26							396.287
14	A	2284		1410.8	171	241247	155.643
	B	2289		622.623	2	1245.25	0.803383
				767.493	2	1534.99	0.990312
				822.341	2	1644.68	1.06108
				921.119	2	1842.24	1.18854
				796.183	2	1592.37	1.02733
				888.738	2	1777.48	1.14676
				948.806	2	1897.61	1.22426
				965.26	2	1930.52	1.24549
				1331.52	2	2663.05	1.71809
				1154.11	2	2308.23	1.48918
				1000.28	2	2000.56	1.29068
				1109.34	2	2218.68	1.4314
				1157.6	2	2315.19	1.49367
				1573.7	2	3147.39	2.03057
				1334.11	2	2668.22	1.72143
				1006.03	2	2012.05	1.2981
				1151.16	2	2302.32	1.48537
				1137.61	2	2275.21	1.46788
				1137.61	2	2275.21	1.46788
		2291		622.623	12	7471.48	4.8203
				767.493	12	9209.92	5.94187
				822.341	12	9868.09	6.3665
				921.119	12	11053.4	7.13123
				796.183	12	9554.2	6.16399
				888.738	12	10664.9	6.88054
				948.806	12	11385.7	7.34558
				965.26	12	11583.1	7.47297
				1331.52	12	15978.3	10.3086
				1154.11	12	13849.4	8.93506
				1000.28	12	12003.3	7.74407
				1109.34	12	13312.1	8.58842
				1157.6	12	13891.1	8.96201
				1573.7	12	18884.4	12.1834
				1334.11	12	16009.3	10.3286
				1006.03	12	12072.3	7.78857
				1151.16	12	13813.9	8.9122
				1137.61	12	13651.3	8.80726
				1137.61	12	13651.3	8.80726
				1410.8	30	42324	27.3058
		2293		622.623	2	1245.25	0.803383
				767.493	2	1534.99	0.990312
				822.341	2	1644.68	1.06108
				921.119	2	1842.24	1.18854
				796.183	2	1592.37	1.02733
				888.738	2	1777.48	1.14676
				948.806	2	1897.61	1.22426
				965.26	2	1930.52	1.24549
				1331.52	2	2663.05	1.71809
				1154.11	2	2308.23	1.48918
				1000.28	2	2000.56	1.29068
				1109.34	2	2218.68	1.4314
				1157.6	2	2315.19	1.49367
				1573.7	2	3147.39	2.03057
				1334.11	2	2668.22	1.72143
				1006.03	2	2012.05	1.2981
				1151.16	2	2302.32	1.48537
				1137.61	2	2275.21	1.46788
				1137.61	2	2275.21	1.46788
	C	2294		463.596	1	463.596	0.299094
				471.627	1	471.627	0.304275
				507.311	1	507.311	0.327297
				1947.99	1	1947.99	1.25677
				1410.8	43	60664.4	39.1382
		2296		1410.8	41	57842.8	37.3179
		2297		1410.8	30	42324	27.3058
		2298		1410.8	30	42324	27.3058
		2299		1410.8	30	42324	27.3058
		2300		1410.8	30	42324	27.3058
	D	2278		1152.04	1	1152.04	0.743251
				1178.63	1	1178.63	0.760404
				1007.46	1	1007.46	0.649973
				1222.24	1	1222.24	0.788543
				1402.27	1	1402.27	0.904689
				984.896	1	984.896	0.635416
				950.341	1	950.341	0.613122
				889.792	1	889.792	0.574058
				749.623	1	749.623	0.483627
				861.287	1	861.287	0.555668
				736.883	1	736.883	0.475407
				683.928	1	683.928	0.441243
				1007.46	1	1007.46	0.649973
		2279		163.577	1	163.577	0.105533
				241.741	1	241.741	0.155962
				209.47	1	209.47	0.135142
				114.359	1	114.359	0.0737799
				250.64	1	250.64	0.161703
				218.143	1	218.143	0.140737
				252.559	1	252.559	0.162941
				301.178	1	301.178	0.194308
				198.535	1	198.535	0.128087
				885.37	2	1770.74	1.14241
				1176.44	2	2352.88	1.51799
				694.349	2	1388.7	0.895932
				1936.09	2	3872.18	2.49817
				332.116	1	332.116	0.214268
				298.942	1	298.942	0.192865
				226.026	1	226.026	0.145823
		2280		1491.94	3	4475.82	2.88762
				1877.88	36	67603.8	43.6153
		2282		1152.04	1	1152.04	0.743251
				1178.63	1	1178.63	0.760404
				1007.46	1	1007.46	0.649973
				1222.24	1	1222.24	0.788543
				1402.27	1	1402.27	0.904689
				984.896	1	984.896	0.635416
				950.341	1	950.341	0.613122
				889.792	1	889.792	0.574058
				749.623	1	749.623	0.483627
				861.287	1	861.287	0.555668
				736.883	1	736.883	0.475407
				683.928	1	683.928	0.441243
				1007.46	1	1007.46	0.649973
		2296		1410.8	24	33859.2	21.8446
TOTAL 14							668.23
23	A	2206	1	1053.34	3	3160.01	2.03871
			2	4353.63	3	13060.9	8.42637
			3	942.317	3	2826.95	1.82384
			4	4047.59	3	12142.8	7.83403
			5	861.804	3	2585.41	1.668
			6	3767.19	3	11301.6	7.29132
			7	797.784	3	2393.35	1.54409
			8	1633.24	3	4899.71	3.1611
		5883	1	2369.82	1	2369.82	1.52892
			2	7047.75	1	7047.75	4.54693
			3	1739.09	1	1739.09	1.12199
			4	1008.02	1	1008.02	0.650335
			5	1575.51	1	1575.51	1.01646
			6	2659.14	1	2659.14	1.71557
			7	2856.52	2	5713.03	3.68582
			8	1830.8	2	3661.59	2.36231
			9	1816.99	2	3633.97	2.34449
			10	2474.66	2	4949.31	3.1931
			11	4124.02	2	8248.04	5.3213
			12	805.684	1	805.684	0.519795
			13	3977.91	1	3977.91	2.56639
			14	10338.2	1	10338.2	6.66982
			15	5039.42	1	5039.42	3.25123
			16	24499.7	1	24499.7	15.8062
			17	5741.87	1	5741.87	3.70443
			18	28597.7	1	28597.7	18.4501
			19	6535.88	1	6535.88	4.21669
			20	33676.5	1	33676.5	21.7267
			21	8926.31	1	8926.31	5.7589
			square window	2057.43	3	6172.31	3.98212
				3632.72	3	10898.2	7.03105
				853.232	3	2559.7	1.65141
	B	2201	1	2196.82	1	2196.82	1.4173
			2	8851.03	1	8851.03	5.71033
			3	1853.12	1	1853.12	1.19556
			4	7665.89	1	7665.89	4.94572
			5	1567.09	1	1567.09	1.01103
			6	6256.44	1	6256.44	4.0364
			7	1220.97	1	1220.97	0.787723
			8	2451.16	1	2451.16	1.58139
		2202	1	2783.07	1	2783.07	1.79553
			2	1476.28	1	1476.28	0.952439
			3	8098.35	1	8098.35	5.22473
			4	1983.63	1	1983.63	1.27976
			5	10969.8	1	10969.8	7.07727
			6	2748.59	1	2748.59	1.77328
			7	13755.9	1	13755.9	8.87478
			8	3458.82	1	3458.82	2.23149
		2203	1	1098.41	1	1098.41	0.70865
			2	4425.52	1	4425.52	2.85517
			3	926.559	1	926.559	0.597779
			4	3832.94	1	3832.94	2.47286
			5	783.547	1	783.547	0.505513
			6	3128.22	1	3128.22	2.0182
			7	610.486	1	610.486	0.393861
			8	1225.58	1	1225.58	0.790695
		5879	1	2043.79	2	4087.57	2.63714
			2	867.291	1	867.291	0.559541
			3	1172.36	9	10551.2	6.80723
			4	1175.8	9	10582.2	6.8272
			5	1532.06	9	13788.5	8.8958
			6	2577.88	9	23200.9	14.9683
			7	1772.58	9	15953.2	10.2924
			8	1247.94	8	9983.56	6.44099
			9	3442.21	8	27537.6	17.7662
			10	1363.06	13	17719.7	11.4321
			sq window	2057.43	6	12344.6	7.96425
				3632.72	6	21796.3	14.0621
				853.232	6	5119.39	3.30283
	C	5889 (sq window)	1	2057.43	5	10287.2	6.63687
			2	3632.72	5	18163.6	11.7184
			3	853.232	5	4266.16	2.75236
		2208	1	943.913	1	943.913	0.608975
			2	1532.38	1	1532.38	0.988627
			3	350.312	1	350.312	0.226007
	D	(sq window)	1	2057.43	13	26746.7	17.2559
			2	3632.72	13	47225.3	30.4679
			3	853.232	13	11092	7.15613
			1	943.913	1	943.913	0.608975
			2	1532.38	1	1532.38	0.988627
			3	350.312	1	350.312	0.226007
TOTAL 23							408.438
15	A	2355		1173.49	14	16428.9	10.5992
				195.292	14	2734.09	1.76392
				3350.35	14	46904.9	30.2611
				217.797	14	3049.16	1.96719
				1173.49	12	14081.9	9.08507
				195.292	12	2343.5	1.51194
				3350.35	12	40204.2	25.9381
				457.747	12	5492.96	3.54384
		2356		3193.03	1	3193.03	2.06001
				959.335	1	959.335	0.618925
				434.29	1	434.29	0.280187
				1393.65	1	1393.65	0.899129
				1222.88	1	1222.88	0.788951
				382.538	1	382.538	0.246798
	B	2378		882.16	3	2646.48	1.7074
				2502.06	3	7506.19	4.84269
				2248.55	3	6745.65	4.35202
		2379		1827.88	5	9139.42	5.89639
				2442.39	1	2442.39	1.57573
				8842.8	1	8842.8	5.70502
				817.951	1	817.951	0.527709
		2380		876.664	1	876.664	0.565589
				2816.12	1	2816.12	1.81685
				867.744	1	867.744	0.559834
				410.846	1	410.846	0.265061
		2381		280.633	1	280.633	0.181053
				856.947	1	856.947	0.552868
				277.262	1	277.262	0.178878
				151.762	1	151.762	0.0979108
				2022.82	1	2022.82	1.30504
				585.328	1	585.328	0.37763
				640.811	1	640.811	0.413426
				2050.2	1	2050.2	1.32271
				637.906	1	637.906	0.411551
				306.736	1	306.736	0.197894
				281.843	1	281.843	0.181834
				875.767	1	875.767	0.56501
				266.28	1	266.28	0.171793
				121.683	1	121.683	0.078505
				363.754	1	363.754	0.23468
				1163.68	1	1163.68	0.750759
				363.85	1	363.85	0.234741
				165.416	1	165.416	0.10672
		2382		1543.69	2	3087.38	1.99185
				1512.61	33	49916.3	32.204
				1587.24	33	52379	33.7928
				2308.61	2	4617.23	2.97885
				5609.89	2	11219.8	7.23855
		2383		1173.49	2	2346.98	1.51418
				195.292	2	390.584	0.251989
				3350.35	2	6700.7	4.32302
				217.797	2	435.594	0.281028
				1173.49	2	2346.98	1.51418
				195.292	2	390.584	0.251989
				3350.35	2	6700.7	4.32302
				457.747	2	915.494	0.59064
		2385		1173.49	8	9387.92	6.05671
				195.292	8	1562.34	1.00796
				3350.35	8	26802.8	17.2921
				217.797	8	1742.38	1.12411
				1173.49	8	9387.92	6.05671
				195.292	8	1562.34	1.00796
				3350.35	8	26802.8	17.2921
				457.747	8	3661.98	2.36256
		2387		3193.03	1	3193.03	2.06001
				959.335	1	959.335	0.618925
				434.29	1	434.29	0.280187
				1393.65	1	1393.65	0.899129
				1222.88	1	1222.88	0.788951
				382.538	1	382.538	0.246798
		2388		1173.49	2	2346.98	1.51418
				195.292	2	390.584	0.251989
				3350.35	2	6700.7	4.32302
				457.747	2	915.494	0.59064
	C	2357		348.778	2	697.556	0.450035
				165.348	6	992.088	0.640055
				518.658	2	1037.32	0.669235
				226.304	2	452.608	0.292005
		2358		1173.49	2	2346.98	1.51418
				195.292	2	390.584	0.251989
				3350.35	2	6700.7	4.32302
				457.747	2	915.494	0.59064
		2359		1967.3	1	1967.3	1.26922
				509.273	1	509.273	0.328563
				660.01	1	660.01	0.425812
				2239.07	1	2239.07	1.44456
				762.904	1	762.904	0.492195
				393.755	1	393.755	0.254035
				395.488	6	2372.93	1.53092
				3344.6	6	20067.6	12.9468
		2360		3134.45	6	18806.7	12.1333
				2488.65	6	14931.9	9.63347
				2692.78	9	24235.1	15.6355
				1388.81	1	1388.81	0.896007
				743.743	1	743.743	0.479833
				1963.14	1	1963.14	1.26654
				985.62	1	985.62	0.635883
				4550	1	4550	2.93548
				2285.9	1	2285.9	1.47477
				1321.95	1	1321.95	0.852872
				2635.28	1	2635.28	1.70018
		2361		3388.34	1	3388.34	2.18602
				699.196	7	4894.37	3.15765
	D	2373		1287.15	6	7722.92	4.98252
				3567.93	6	21407.6	13.8113
				768.243	1	768.243	0.49564
		2374		142.835	2	285.67	0.184303
				389.838	2	779.676	0.503016
				358.158	2	716.316	0.462138
				1981.69	2	3963.38	2.55701
				954.769	1	954.769	0.615979
				1286.67	1	1286.67	0.830109
				1287.15	2	2574.31	1.66084
				3567.93	2	7135.87	4.60378
				3273.89	2	6547.79	4.22437
		2376		1035.16	2	2070.32	1.33569
				2863.3	2	5726.6	3.69457
				2641.03	2	5282.06	3.40777
				704.385	1	704.385	0.454441
	E	2370		824.678	28	23091	14.8974
				2326.66	28	65146.5	42.0299
	F	2368		1737.01	3	5211.03	3.36195
				4872.02	3	14616.1	9.42971
				407.188	2	814.376	0.525403
		2369		1105.13	1	1105.13	0.712984
				957.499	4	3830	2.47096
				2743.8	8	21950.4	14.1615
				152.195	2	304.39	0.19638
				749.987	2	1499.97	0.967723
				2012.1	2	4024.19	2.59625
				953.041	1	953.041	0.614864
	G	2362		1038.01	1	1038.01	0.669685
				2014.42	2	4028.83	2.59924
				807.215	1	807.215	0.520783
				1989.08	1	1989.08	1.28328
				1899.21	1	1899.21	1.22529
				521.056	1	521.056	0.336164
				1550.42	1	1550.42	1.00027
				3857.78	1	3857.78	2.48888
				3689.18	1	3689.18	2.38011
				1002.88	1	1002.88	0.647019
		2363		89.757	1	89.757	0.0579076
				258.397	1	258.397	0.166707
				240.751	1	240.751	0.155323
				2018.41	4	8073.64	5.20879
				815.405	4	3261.62	2.10427
				2256.56	4	9026.24	5.82337
		2364&2365		815.405	7	5707.84	3.68247
				2256.56	7	15795.9	10.1909
TOTAL 15							536.512
27	A	5919	1	2704.3	7	18930.1	12.213
			2	2377.37	7	16641.6	10.7365
			3	1927.7	7	13493.9	8.70572
			4	1139.2	7	7974.38	5.14475
		5921	1	2701.45	1	2701.45	1.74287
			2	2265.82	1	2265.82	1.46182
			3	4719.97	1	4719.97	3.04513
			4	2172.27	1	2172.27	1.40146
			5	983.192	1	983.192	0.634316
			6	6557.49	1	6557.49	4.23063
			7	2974.91	1	2974.91	1.91929
			8	6185.62	1	6185.62	3.99072
			9	1292.32	1	1292.32	0.833752
		5922	1	1822.63	1	1822.63	1.17589
		5909	1	1874.52	2	3749.04	2.41873
			2	9750.24	2	19500.5	12.5809
			3	4839.48	2	9678.96	6.24448
			4	4839.48	2	9678.96	6.24448
			5	10720.1	2	21440.2	13.8323
			6	5219.28	2	10438.6	6.73454
			7	11573.3	2	23146.6	14.9332
			8	12243.6	2	24487.2	15.7982
			9	5987.16	2	11974.3	7.72535
			10	13165.6	2	26331.1	16.9878
			11	13844.9	2	27689.8	17.8643
			12	2505.6	2	5011.2	3.23303
	D	5924	1	1468.46	2	2936.92	1.89479
			2	8671.95	2	17343.9	11.1896
			3	4012.88	2	8025.75	5.17789
			4	8259.57	2	16519.1	10.6575
			5	3823.34	2	7646.67	4.93333
			6	8083.53	2	16167.1	10.4303
			7	5523.84	2	11047.7	7.12752
			1	463.809	23	10667.6	6.88231
			2	1011.29	23	23259.6	15.0061
			3	499.955	23	11499	7.41867
			4	774.754	23	17819.3	11.4963
			5	2607.1	23	59963.3	38.6859
		5928	1	280.181	2	560.362	0.361523
			2	986.325	2	1972.65	1.27267
	C	5930(taken from 5924&5928)	1	463.809	4	1855.24	1.19692
			2	1011.29	4	4045.14	2.60977
			3	499.955	4	1999.82	1.2902
			4	774.754	4	3099.02	1.99936
			5	2607.1	4	10428.4	6.72798
			6	280.181	2	560.362	0.361523
			7	986.325	2	1972.65	1.27267
			1	762.71	1	762.71	0.49207
			2	763.8	1	763.8	0.492773
		5931	1	1296.99	2	2593.98	1.67353
			2	2179.41	2	4358.81	2.81213
			3	4588.32	2	9176.64	5.9204
			4	4607.79	2	9215.58	5.94553
			5	2214.87	2	4429.74	2.85789
			6	4636.21	2	9272.42	5.98219
			7	2255.87	2	4511.74	2.91079
			8	937.2	2	1874.4	1.20929
		5939	1	878.801	2	1757.6	1.13393
			2	1109.96	2	2219.91	1.4322
			3	583.085	2	1166.17	0.752366
			4	1595.34	2	3190.68	2.0585
			5	843.688	2	1687.38	1.08863
			6	2382.78	2	4765.56	3.07455
			7	1345.94	2	2691.89	1.7367
			8	3888.04	2	7776.07	5.01681
			9	5784.31	2	11568.6	7.46361
			10	3656.29	2	7312.59	4.71779
			11	1261.69	4	5046.78	3.25598
	B	2215	1	1465.42	2	2930.84	1.89086
			2	8355.57	2	16711.1	10.7814
			3	3822.01	2	7644.02	4.93161
			4	8421.61	2	16843.2	10.8666
			5	3868.88	2	7737.76	4.9921
			6	8494.39	2	16988.8	10.9605
			7	4855.6	2	9711.2	6.26528
		5944	1	445.276	20	8905.52	5.74549
			2	712.936	20	14258.7	9.19916
			3	996.104	20	19922.1	12.8529
			4	534.139	20	10682.8	6.8921
			5	2564.76	20	51295.1	33.0936
		5946	1	1665.97	1	1665.97	1.07482
			2	1682.74	1	1682.74	1.08564
			3	2927.09	1	2927.09	1.88844
			4	4517.08	1	4517.08	2.91424
			5	1292.61	1	1292.61	0.833942
			6	2956.22	1	2956.22	1.90723
TOTAL 27							520.03
24	A	5910	1	2413.63	35	84477.1	54.5012
		5913	1	2701.65	1	2701.65	1.743
			2	1705.66	1	1705.66	1.10042
			3	967.452	1	967.452	0.624161
			4	598.316	1	598.316	0.38601
			5	951.431	1	951.431	0.613825
			6	590.819	1	590.819	0.381173
			7	2713.97	1	2713.97	1.75095
			8	1706.91	1	1706.91	1.10123
			9	1520.13	1	1520.13	0.980726
			10	2087.13	1	2087.13	1.34654
			11	541.272	1	541.272	0.349207
			12	774.908	1	774.908	0.49994
			13	558.367	1	558.367	0.360236
			14	1149.37	1	1149.37	0.741527
			15	843.675	1	843.675	0.544305
		5916	1	3193.64	16	51098.2	32.9665
			2	2812.36	41	115307	74.3913
			1	2276.24	4	9104.94	5.87415
	B	5903	1	2892	48	138816	89.5585
	C	5895	1	1741.19	6	10447.1	6.74007
			2	1680.02	6	10080.1	6.50328
			3	1673.25	6	10039.5	6.47708
			4	1932.41	6	11594.5	7.4803
			5	1321.71	6	7930.25	5.11628
			6	701.056	5	3505.28	2.26147
			7	1082.56	10	10825.6	6.98425
		5896	1	3187.45	3	9562.36	6.16925
			2	2055.5	3	6166.5	3.97838
			3	965.191	2	1930.38	1.24541
			4	618.145	2	1236.29	0.797605
			5	2311.42	1	2311.42	1.49124
			6	1466.61	1	1466.61	0.946198
		5900	1	3064.49	34	104193	67.221
			2	1635.15	2	3270.3	2.10987
		5893	1	3193.64	6	19161.8	12.3624
			2	2812.36	12	33748.3	21.7731
		5894	1	3193.64	4	12774.6	8.24163
			2	2812.36	14	39373.1	25.4019
	D	5892	1	3152.18	8	25217.5	16.2693
			2	3700.83	2	7401.66	4.77525
TOTAL 24							484.16
10	A	5815	1	2118.16	1	2118.16	1.36656
			2	2110.93	1	2110.93	1.36189
			3	1116.35	1	1116.35	0.720226
			4	1429.47	12	17153.7	11.0669
			5	612.953	12	7355.44	4.74543
			6	1871.64	12	22459.7	14.4901
			7	1009.62	12	12115.4	7.81637
			8	1420.51	12	17046.1	10.9974
			9	992.305	12	11907.7	7.68235
			1	656.668	9	5910.01	3.8129
			2	1979.98	9	17819.9	11.4967
			3	1071.61	9	9644.52	6.22226
			4	1545.73	9	13911.6	8.97522
			5	1060.01	9	9540.08	6.15488
			6	715.377	9	6438.39	4.15379
			7	2143.24	9	19289.2	12.4446
			8	1151.22	9	10361	6.68448
			9	1628.57	9	14657.2	9.45622
			10	1094.43	9	9849.88	6.35475
	F	5810	1	664.057	1	664.057	0.428423
			2	626.044	1	626.044	0.403899
			3	911.544	1	911.544	0.588092
			4	927.862	1	927.862	0.598619
			5	931.525	1	931.525	0.600983
			6	586.699	1	586.699	0.378515
			7	690.366	1	690.366	0.445397
			8	533.891	1	533.891	0.344445
			9	569.667	13	7405.67	4.77784
			10	787.705	13	10240.2	6.60654
			11	817.963	13	10633.5	6.86032
			12	564.053	13	7332.69	4.73076
			13	796.364	13	10352.7	6.67917
			14	480.368	13	6244.78	4.02888
		5812	1	622.295	4	2489.18	1.60592
			2	1853.92	4	7415.68	4.7843
			3	1007.64	4	4030.58	2.60037
			4	1434.26	4	5737.03	3.7013
			5	979.634	4	3918.54	2.52808
	B	6072	1	561.475	1	561.475	0.362241
			2	639.246	1	639.246	0.412416
			3	490.757	1	490.757	0.316617
			4	1492.69	1	1492.69	0.963023
			5	702.447	1	702.447	0.453191
			6	930.146	1	930.146	0.600093
			7	414.378	1	414.378	0.26734
			8	509.133	2	1018.27	0.656944
			9	709.964	2	1419.93	0.916081
			10	979.658	2	1959.32	1.26407
			11	998.823	2	1997.65	1.2888
		top window start	12	417.366	20	8347.32	5.38536
			13	419.014	20	8380.28	5.40662
			14	580.41	20	11608.2	7.48915
			15	614.187	20	12283.7	7.92498
			16	603.477	20	12069.5	7.78678
		top window end	17	379.379	20	7587.58	4.8952
			18	558.734	2	1117.47	0.720946
			19	562.396	2	1124.79	0.725671
			20	767.912	2	1535.82	0.990852
			21	795.812	2	1591.62	1.02685
			22	800.132	2	1600.26	1.03243
			23	843.63	2	1687.26	1.08855
			24	817.323	2	1634.65	1.05461
			25	540.134	2	1080.27	0.696946
		6074	1	469.239	1	469.239	0.302734
			2	2942.91	2	5885.82	3.7973
			3	978.392	4	3913.57	2.52488
			4	6271.6	8	50172.8	32.3695
	C	6075		417.366	2	834.732	0.538536
				419.014	2	838.028	0.540662
				580.41	2	1160.82	0.748915
				614.187	2	1228.37	0.792498
				603.477	2	1206.95	0.778678
				379.379	2	758.758	0.48952
			1	437.35	1	437.35	0.282161
			2	2417.06	2	4834.12	3.11878
			3	946.743	6	5680.46	3.6648
			4	5520.16	6	33121	21.3683
			5	5001.34	6	30008	19.36
	D	5802		417.366	6	2504.2	1.61561
				419.014	6	2514.08	1.62199
				580.41	6	3482.46	2.24674
				614.187	6	3685.12	2.37749
				603.477	6	3620.86	2.33604
				379.379	6	2276.27	1.46856
		5803	1	449.037	1	449.037	0.289701
			2	2952.17	1	2952.17	1.90462
			3	2938.07	1	2938.07	1.89552
			4	674.492	1	674.492	0.435155
			5	4577.25	1	4577.25	2.95306
			6	1509.56	1	1509.56	0.97391
		5805	1	563.683	6	3382.1	2.18199
			2	3482.43	6	20894.6	13.4804
			3	3015.58	6	18093.5	11.6732
			4	606.224	6	3637.34	2.34667
			5	3886.56	6	23319.3	15.0447
			6	1386.02	6	8316.13	5.36524
			7	341.923	1	341.923	0.220595
			8	84.803	1	84.803	0.0547115
			9	504.46	1	504.46	0.325457
			10	637.379	1	637.379	0.411211
			11	233.677	1	233.677	0.150759
			12	451.762	1	451.762	0.291459
			13	504.795	1	504.795	0.325674
			14	416.751	1	416.751	0.268871
	E	5806	1	706.263	1	706.263	0.455653
			2	2702.66	1	2702.66	1.74365
			3	691.425	1	691.425	0.44608
			4	2020.33	1	2020.33	1.30343
			5	167.709	2	335.418	0.216398
			6	1061.12	2	2122.24	1.36918
			7	1039.72	2	2079.45	1.34158
			8	1812.88	2	3625.75	2.33919
			9	550.862	2	1101.72	0.710788
			10	486.294	2	972.588	0.627475
			11	3096.55	2	6193.11	3.99554
			12	3001.93	2	6003.85	3.87344
			13	684.351	2	1368.7	0.883032
			14	4354.93	2	8709.85	5.61925
			15	1559.47	2	3118.95	2.01222
			16	924.43	1	924.43	0.596405
			17	673.04	2	1346.08	0.868437
			18	616.504	2	1233.01	0.795487
			19	751.238	2	1502.48	0.969337
			20	605.96	2	1211.92	0.781882
		5807	1	4477.95	1	4477.95	2.88899
			2	2520.24	1	2520.24	1.62596
			3	2890.37	1	2890.37	1.86475
			4	1599.12	1	1599.12	1.03169
			5	333.57	1	333.57	0.215206
			6	480.96	1	480.96	0.310296
			7	518.49	1	518.49	0.334509
			8	498.78	1	498.78	0.321793
			9	703.35	1	703.35	0.453773
			10	714.71	1	714.71	0.461102
		5808	1	417.366	17	7095.22	4.57755
			2	419.014	17	7123.24	4.59563
			3	580.41	17	9866.97	6.36577
			4	614.187	17	10441.2	6.73623
			5	603.477	17	10259.1	6.61877
			6	379.379	17	6449.44	4.16092
			7	558.734	3	1676.2	1.08142
			8	562.396	3	1687.19	1.08851
			9	767.912	3	2303.74	1.48628
			10	795.812	3	2387.44	1.54028
			11	800.132	3	2400.4	1.54864
			12	843.63	3	2530.89	1.63283
			13	817.323	3	2451.97	1.58191
			14	540.134	3	1620.4	1.04542
TOTAL 10							489.874
16	C	2389	1	1249.6	1	1249.6	0.806191
			2	300.089	1	300.089	0.193605
			3	463.44	1	463.44	0.298993
			4	1980.63	1	1980.63	1.27783
			5	3143.91	1	3143.91	2.02832
			6	1145.78	1	1145.78	0.73921
		2390	1	3561.45	2	7122.89	4.5954
			2	1845.12	2	3690.24	2.38079
			3	2395.29	2	4790.58	3.09069
			4	897.477	2	1794.95	1.15803
			5	5812.2	2	11624.4	7.4996
			6	2321	2	4642	2.99484
		2393	1	1190.62	37	44053	28.4212
			2	193.673	37	7165.9	4.62315
			3	534.524	37	19777.4	12.7596
			4	3471.78	37	128456	82.8746
		2394	1	639.06	1	639.06	0.412296
			2	2156.97	1	2156.97	1.39159
			3	2150.11	1	2150.11	1.38717
			4	1100.72	1	1100.72	0.710142
			5	2224.98	1	2224.98	1.43547
			6	2193.08	1	2193.08	1.41489
	B		1	1190.62	15	17859.3	11.5221
			2	193.673	15	2905.1	1.87425
			3	534.524	15	8017.86	5.1728
			4	3471.78	15	52076.7	33.5978
		2396	1	2188.37	1	2188.37	1.41185
			2	2020.38	1	2020.38	1.30347
			3	1306.25	1	1306.25	0.84274
			4	1043.21	1	1043.21	0.673038
			5	913.178	1	913.178	0.589146
			6	876.222	1	876.222	0.565303
			7	698.397	1	698.397	0.450578
			8	725.491	1	725.491	0.468058
			9	1151.74	1	1151.74	0.743054
			10	1120.95	1	1120.95	0.723193
			11	502.663	1	502.663	0.324298
			12	962.401	1	962.401	0.620903
			13	919.967	1	919.967	0.593526
			14	266	1	266	0.171613
		2400	1	1056.52	1	1056.52	0.681623
			2	2393.16	1	2393.16	1.54397
			3	2248.06	1	2248.06	1.45036
		2401	1	1897.43	4	7589.71	4.89658
			2	852.063	65	55384.1	35.7316
	A	2404	1	2143.03	2	4286.07	2.7652
		2405	1	1067.04	24	25609	16.5219
			2	153.716	24	3689.18	2.38011
			3	431.488	24	10355.7	6.68109
			4	3205.78	24	76938.6	49.6377
		2402	1	4182.93	9	37646.3	24.2879
			2	991.168	13	12885.2	8.31301
			3	2214.21	34	75283.1	48.5696
			4	712.519	4	2850.08	1.83876
			5	209.738	1	209.738	0.135315
	D	2408	1	2304.25	1	2304.25	1.48661
			2	1204.38	1	1204.38	0.777016
			3	1543.18	1	1543.18	0.995597
			4	785.162	1	785.162	0.506555
			5	2747.2	1	2747.2	1.77238
			6	1410.75	1	1410.75	0.910162
			7	4548.66	1	4548.66	2.93461
			8	2311.14	1	2311.14	1.49105
			9	1856.1	1	1856.1	1.19748
			10	935.718	1	935.718	0.603688
		2409	1	841.619	1	841.619	0.542979
			2	2232.92	1	2232.92	1.44059
			3	1407.83	1	1407.83	0.908275
			4	750.021	1	750.021	0.483884
			5	1529.43	1	1529.43	0.986728
		2412	1	2132.56	2	4265.12	2.75169
			2	75.206	2	150.412	0.0970398
			3	177.006	8	1416.05	0.913578
			4	295.25	2	590.5	0.380967
		2413	1	2132.56	1	2132.56	1.37584
			1	331.566	4	1326.26	0.855652
			2	951.476	7	6660.33	4.29698
		2414	1	898.949	11	9888.44	6.37963
			2	2338.07	11	25718.7	16.5927
		2415	1	816.991	1	816.991	0.52709
			2	1955.16	1	1955.16	1.26139
			3	598.671	1	598.671	0.386239
			4	569.538	1	569.538	0.367443
			5	624.285	1	624.285	0.402764
			6	1375.12	1	1375.12	0.88717
		2416	1	2035.78	1	2035.78	1.3134
			2	642.064	1	642.064	0.414234
			3	4655.85	1	4655.85	3.00377
			4	1453.98	1	1453.98	0.938049
			5	1483.4	1	1483.4	0.957032
			6	460.268	1	460.268	0.296947
			7	1416.75	1	1416.75	0.914028
			8	405.582	1	405.582	0.261665
			9	1451.62	1	1451.62	0.936527
			10	485.876	1	485.876	0.313468
			11	3262.9	1	3262.9	2.10509
			12	981.23	1	981.23	0.63305
		2410	1	1067.04	10	10670.4	6.88413
			2	153.716	10	1537.16	0.991714
			3	431.488	10	4314.88	2.78379
			4	3205.78	10	32057.8	20.6824
TOTAL 16							527.519
20	A	2180		1090.32	12	13083.9	8.44118
				1090.32	12	13083.9	8.44118
				1090.32	12	13083.9	8.44118
				1090.32	12	13083.9	8.44118
				1090.32	12	13083.9	8.44118
				3692.1	12	44305.2	28.5839
				1794.29	12	21531.4	13.8912
				809.14	12	9709.68	6.2643
				6117.68	12	73412.2	47.3626
				2329.94	12	27959.2	18.0382
		6087		1628.97	10	16289.7	10.5094
				314.901	1	314.901	0.203162
		6088		669.063	10	6690.63	4.31653
				194.057	1	194.057	0.125198
				591.436	2	1182.87	0.763142
				1374.13	20	27482.6	17.7307
		6092		812.685	2	1625.37	1.04862
				4295.93	2	8591.85	5.54312
				958.303	3	2874.91	1.85478
				910.684	3	2732.05	1.76261
				865.899	3	2597.7	1.67593
				337.452	4	1349.81	0.870842
				918.144	3	2754.43	1.77705
				1794.29	2	3588.57	2.3152
				809.14	2	1618.28	1.04405
				6117.68	2	12235.4	7.89376
				2329.94	2	4659.87	3.00636
		6094		168.35	2	336.7	0.217225
				57.249	2	114.498	0.0738695
				101.909	6	611.454	0.394486
		6095		1411.14	1	1411.14	0.910409
				259.762	1	259.762	0.167588
				711.09	1	711.09	0.458767
				3898.63	1	3898.63	2.51524
				747.595	3	2242.78	1.44696
				282.897	3	848.691	0.547541
				1794.29	2	3588.57	2.3152
				809.14	2	1618.28	1.04405
				6117.68	2	12235.4	7.89376
				2329.94	2	4659.87	3.00636
		6096		515.982	7	3611.87	2.33024
				1399.13	7	9793.91	6.31864
	B	6101		669.063	10	6690.63	4.31653
				194.057	1	194.057	0.125198
				1794.29	13	23325.7	15.0488
				809.14	13	10518.8	6.78632
				6117.68	13	79529.8	51.3095
				2329.94	13	30289.2	19.5414
		6102		1770.74	4	7082.96	4.56964
				4254.57	4	17018.3	10.9795
				1328.1	4	5312.38	3.42734
				3427.17	4	13708.7	8.84429
				1958.23	4	7832.91	5.05348
				3038.05	4	12152.2	7.84011
				1088.72	4	4354.89	2.8096
		6105		939.956	1	939.956	0.606422
				2212.63	1	2212.63	1.4275
				676.897	1	676.897	0.436707
				1793.5	1	1793.5	1.15709
	C	6099		1461.27	7	10228.9	6.59927
				1479.75	7	10358.2	6.68272
				1409.97	7	9869.8	6.3676
		6100		1004.45	7	7031.14	4.53621
				3519.62	7	24637.4	15.895
				837.813	7	5864.69	3.78366
				280.986	7	1966.9	1.26897
				359.229	1	359.229	0.23176
				806.728	1	806.728	0.520469
				413.618	2	827.236	0.5337
				1387.88	2	2775.76	1.79081
	E	6086		1004.45	4	4017.79	2.59212
				3519.62	4	14078.5	9.08289
				837.813	4	3351.25	2.16209
				280.986	4	1123.94	0.725124
20	E	6084	1	1972.78	1	1972.78	1.27276
			2	6924.32	1	6924.32	4.4673
			3	1334.8	1	1334.8	0.861159
			4	648.215	1	648.215	0.418202
			5	748.944	1	748.944	0.483189
			6	752.326	1	752.326	0.485371
			7	1559.21	1	1559.21	1.00594
20	E	6080	1	7011.12	1	7011.12	4.5233
			2	5648.32	1	5648.32	3.64407
			3	1487.96	1	1487.96	0.959973
20	D	6106	1	2842.41	1	2842.41	1.83381
			2	6502.06	1	6502.06	4.19487
			3	3399.04	1	3399.04	2.19293
			4	6655.52	1	6655.52	4.29387
			5	4159.77	1	4159.77	2.68371
			6	10314.4	1	10314.4	6.65444
TOTAL 20							495.454
21	A	6048	1	1592.75	2	3185.5	2.05516
			2	1090.32	68	74141.8	47.8333
			3	905.877	5	4529.39	2.92218
			4	3692.1	17	62765.7	40.4939
			5	1794.29	17	30502.9	19.6792
			6	809.14	17	13755.4	8.87442
			7	6117.68	17	104001	67.097
			8	2329.94	17	39608.9	25.5541
		6049	1	1507.27	7	10550.9	6.80703
			2	1197.34	7	8381.41	5.40735
			3	810.409	7	5672.86	3.6599
				260.811	8	2086.49	1.34612
	B	6052		1794.29	5	8971.43	5.78801
				809.14	5	4045.7	2.61012
				6117.68	5	30588.4	19.7344
				2329.94	5	11649.7	7.51591
		6053	1	393.333	10	3933.33	2.53763
			2	1454.94	10	14549.4	9.38668
			3	1478.99	10	14789.9	9.54185
			4	1514.37	10	15143.7	9.77013
			5	1492.44	10	14924.4	9.62864
			6	382.951	10	3829.51	2.47065
		6054	1	480.737	10	4807.37	3.10152
		6060	1	480.737	10	4807.37	3.10152
		6052	1	876.795	7	6137.56	3.95971
			2	606.058	7	4242.41	2.73703
	C	6061	1	1502.2	10	15022	9.69157
			2	3004.49	10	30044.9	19.3838
			3	249.148	10	2491.48	1.6074
		6064	1	1613.81	2	3227.62	2.08233
			2	445.602	2	891.204	0.574969
			3	526.495	2	1052.99	0.679347
			4	1929.19	2	3858.38	2.48927
			5	267.139	23	6144.2	3.96399
			6	733.077	23	16860.8	10.8779
			7	554.303	23	12749	8.22512
			8	1871.45	23	43043.5	27.7699
		6066	1	480.737	10	4807.37	3.10152
		6065	1	846.351	1	846.351	0.546032
			2	2368	1	2368	1.52774
			3	1616.38	1	1616.38	1.04282
			4	2687.24	1	2687.24	1.7337
			5	1026.78	1	1026.78	0.662435
			6	3387.17	1	3387.17	2.18527
			7	1178.54	1	1178.54	0.760345
			8	1720.48	3	5161.45	3.32996
			9	4608.07	3	13824.2	8.91883
			10	3130.42	3	9391.27	6.05887
			11	5243.65	3	15731	10.149
			12	2008.45	3	6025.36	3.88732
			13	6541.84	3	19625.5	12.6616
			14	2505.56	3	7516.67	4.84946
	E	6081	1	4873.14	1	4873.14	3.14395
			2	3226.35	8	25810.8	16.6521
21	E	6080	1	7011.12	1	7011.12	4.5233
			2	5648.32	1	5648.32	3.64407
			3	1487.96	1	1487.96	0.959973
21	E	6084	1	1972.78	1	1972.78	1.27276
			2	6924.32	1	6924.32	4.4673
			3	1334.8	1	1334.8	0.861159
			4	648.215	1	648.215	0.418202
			5	748.944	1	748.944	0.483189
			6	752.326	1	752.326	0.485371
			7	1559.21	1	1559.21	1.00594
	D	6068	1	2842.41	1	2842.41	1.83381
			2	6502.06	1	6502.06	4.19487
			3	3399.04	1	3399.04	2.19293
			4	6655.52	1	6655.52	4.29387
			5	4159.77	1	4159.77	2.68371
			6	10314.4	1	10314.4	6.65444
TOTAL 21						0	532.145
12	A	2308		2228.24	1	2228.24	1.43757
				369.264	1	369.264	0.238234
				518.404	1	518.404	0.334454
				801.541	1	801.541	0.517122
				513.528	1	513.528	0.331308
				1202.59	1	1202.59	0.775864
				1525.91	5	7629.55	4.92228
				887.48	5	4437.4	2.86283
				585.262	5	2926.31	1.88794
				1890.44	5	9452.18	6.09817
				4429.52	5	22147.6	14.2888
				2781.25	16	44500	28.7096
				846.362	16	13541.8	8.73662
				2203.77	16	35260.3	22.7485
				884.245	4	3536.98	2.28192
				506.261	4	2025.04	1.30648
				814.856	2	1629.71	1.05142
				459.657	2	919.314	0.593105
				235.678	1	235.678	0.15205
				2080.08	1	2080.08	1.34199
	B	5747		1227.2	3	3681.6	2.37522
				808.23	3	2424.69	1.56431
				2376.85	3	7130.55	4.60035
				866.72	3	2600.16	1.67752
				613.98	3	1841.94	1.18835
				957.6	3	2872.8	1.85342
				645.96	3	1937.88	1.25024
				1873.1	3	5619.3	3.62535
				678.72	3	2036.16	1.31365
				468.23	3	1404.69	0.90625
				755.707	5	3778.53	2.43776
				512.949	5	2564.74	1.65467
				1576.41	5	7882.05	5.08518
				580.63	5	2903.15	1.873
				428.069	5	2140.35	1.38086
				1002.13	6	6012.8	3.87922
				685.527	6	4113.16	2.65365
				2141.59	6	12849.6	8.29002
				755.388	6	4532.33	2.92408
				578.344	6	3470.06	2.23875
				314.293	1	314.293	0.202769
				1124.79	3	3374.36	2.177
				2074.11	12	24889.3	16.0576
				523.407	12	6280.88	4.05218
				1661.42	12	19937.1	12.8626
				692.589	4	2770.36	1.78732
				416.245	4	1664.98	1.07418
		5748-5749		432.986	2	865.972	0.55869
				891.455	2	1782.91	1.15026
				317.552	2	635.104	0.409744
				211.593	2	423.186	0.273023
				1952.58	2	3905.15	2.51945
				1226	1	1226	0.790964
				843.975	1	843.975	0.544499
				2074.11	24	49778.6	32.1152
				523.407	24	12561.8	8.10435
				1661.42	21	34889.8	22.5095
				692.589	7	4848.12	3.12782
				416.245	7	2913.72	1.87981
				1704.21	2	3408.43	2.19898
				1945.45	2	3890.91	2.51026
				1640.94	2	3281.87	2.11733
	C	2323		1019.89	4	4079.56	2.63197
				662.354	4	2649.42	1.7093
				2107.86	4	8431.42	5.43962
				760.935	4	3043.74	1.9637
				606.35	4	2425.4	1.56477
		2324		1831.08	1	1831.08	1.18134
				175.326	1	175.326	0.113113
				345.472	1	345.472	0.222885
				675.62	1	675.62	0.435883
				475.084	1	475.084	0.306505
				268.948	1	268.948	0.173514
				1181.33	1	1181.33	0.762144
				409.537	1	409.537	0.264217
				625.151	1	625.151	0.403322
		2327		953.32	3	2859.96	1.84513
				595.37	3	1786.11	1.15233
				1793.4	3	5380.2	3.47109
				644.04	3	1932.12	1.24653
				458.96	3	1376.88	0.888308
				728.44	3	2185.32	1.40988
				471.24	3	1413.72	0.912076
				1380.13	3	4140.39	2.67121
				499.8	3	1499.4	0.967353
				349.66	3	1048.98	0.67676
				1227.2	3	3681.6	2.37522
				808.23	3	2424.69	1.56431
				2376.85	3	7130.55	4.60035
				866.72	3	2600.16	1.67752
				613.98	3	1841.94	1.18835
				957.6	3	2872.8	1.85342
				645.96	3	1937.88	1.25024
				1873.1	3	5619.3	3.62535
				678.72	3	2036.16	1.31365
				468.23	3	1404.69	0.90625
		5742		428.25	7	2997.75	1.93403
				134.451	7	941.157	0.607197
				145.427	7	1017.99	0.656766
				244.207	7	1709.45	1.10287
				990.281	7	6931.97	4.47223
				518.096	20	10361.9	6.6851
				647.093	20	12941.9	8.34957
				200.271	20	4005.42	2.58414
				555.439	3	1666.32	1.07504
				469.743	3	1409.23	0.909178
		5745-2328		3152.09	6	18912.5	12.2016
				960.756	6	5764.54	3.71905
				1522.9	6	9137.38	5.89507
				2694.54	9	24250.8	15.6457
				884.375	9	7959.38	5.13507
				1283.15	9	11548.4	7.45056
	D	5761		428.25	6	2569.5	1.65774
				134.451	6	806.706	0.520454
				145.427	6	872.562	0.562942
				244.207	6	1465.24	0.945316
				990.281	6	5941.69	3.83334
				518.096	12	6217.15	4.01106
				647.093	12	7765.12	5.00974
				200.271	12	2403.25	1.55048
	E	2317		649.324	3	1947.97	1.25675
				661.509	3	1984.53	1.28034
				904.694	3	2714.08	1.75102
				2340.67	3	7022.02	4.53033
				2654.88	3	7964.64	5.13847
				1260.05	3	3780.14	2.4388
				1284.26	3	3852.77	2.48565
				897.91	3	2693.73	1.73789
				897.91	3	2693.73	1.73789
				1772.07	3	5316.2	3.4298
		2318		428.25	3	1284.75	0.828869
				134.451	4	537.804	0.34697
				145.427	4	581.708	0.375295
				244.207	3	732.621	0.472658
				990.281	3	2970.84	1.91667
				518.096	9	4662.86	3.00829
				647.093	6	3882.56	2.50487
				200.271	6	1201.63	0.775241
				555.439	3	1666.32	1.07504
				469.743	3	1409.23	0.909178
	F	2314		1940.54	2	3881.07	2.50391
				389.91	1	389.91	0.251554
				947.036	1	947.036	0.61099
				282.514	2	565.028	0.364533
				216.129	1	216.129	0.139438
				258.318	1	258.318	0.166656
				858.312	1	858.312	0.553749
				362.285	1	362.285	0.233732
				507.754	1	507.754	0.327583
				1768.75	1	1768.75	1.14112
				1962.74	1	1962.74	1.26628
				577.26	1	577.26	0.372425
				75.465	1	75.465	0.048687
				1085.6	1	1085.6	0.700384
				431.23	1	431.23	0.278212
		2315		378.707	1	378.707	0.244327
				666.619	1	666.619	0.430076
				159.934	1	159.934	0.103183
				424.414	1	424.414	0.273815
				30.508	1	30.508	0.0196825
				118.347	1	118.347	0.0763528
				68.092	1	68.092	0.0439302
				1781.49	1	1781.49	1.14934
				1025.27	1	1025.27	0.661461
		2316		1385.29	1	1385.29	0.893734
				1635.66	1	1635.66	1.05526
				1026.73	1	1026.73	0.662408
		5755		428.25	5	2141.25	1.38145
				134.451	6	806.706	0.520454
				145.427	6	872.562	0.562942
				244.207	5	1221.03	0.787763
				990.281	5	4951.4	3.19445
				518.096	12	6217.15	4.01106
				647.093	10	6470.93	4.17479
				200.271	10	2002.71	1.29207
				555.439	3	1666.32	1.07504
				469.743	3	1409.23	0.909178
TOTAL 12							492.175

## Sheet: bird deaths per survey per mo
Month	survey days	# bird deaths	Average bird deaths/survey/month			Year	Survey days
January	29	4	0.137931			2013	47
February	20	4	0.2			2014	189
March	29	13	0.448276			2015	52
April	38	29	0.763158
May	20	42	2.1
June	10	8	0.8
July	14	29	2.07143
August	11	12	1.09091
September	21	37	1.7619
October	32	23	0.71875
November	38	30	0.789474
December	26	9	0.346154
